# Supplementary material for: Short-Term Caloric Restriction Attenuates Obesity-Induced Pro-inflammatory Response in Male Rhesus Macaques
Source: Nutrients. 2020 Feb 18;12(2):511. doi: 10.3390/nu12020511 (PMC7071433; doi:10.3390/nu12020511)
Supplement: Supplementary file 1 [file nutrients-12-00511-s001.xlsx]

## Sheet: Table S1
Diet-specific changes in gene expression. Differentially expressed genes (DEGs) were identified using three comparisons: WSD/CHOW, CR/WSD, and CR/CH. FC, Log2 (fold change).
Ensembl_ID	WSD/CHOW_FC	WSD/CHOW_CPM	WSD/CHOW_FDR	CR/CHOW_FC	CR/CHOW_CPM	CR/CHOW_FDR	CR/WSD_FC	CR/WSD_CPM	CR/WSD_FDR
A1BG	0.078791	0.0289521	0.976189	0.0746811	0.0289521	1	-0.00410987	0.0289521	1
A1BG-AS1	-0.0353887	-0.726789	0.996652	0.220475	-0.726789	1	0.255863	-0.726789	0.902075
A1CF	0.293335	0.931108	0.718857	0.0351176	0.931108	1	-0.258217	0.931108	0.823008
A2M	0.16746	9.90488	0.824266	-0.258737	9.90488	0.852611	-0.426198	9.90488	0.337972
A2M-AS1	0.0964673	4.76842	0.931052	-0.211039	4.76842	0.953031	-0.307507	4.76842	0.621057
A2ML1	0.120222	0.235532	0.947541	-0.255806	0.235532	0.999185	-0.376028	0.235532	0.73651
A2MP1	0.39323	-1.03927	0.7971	-0.722286	-1.03927	0.762372	-1.11552	-1.03927	0.224571
A3GALT2	-0.00106867	0.194435	1	0.081333	0.194435	1	0.0824017	0.194435	0.96963
A4GALT	-0.248107	3.77915	0.68313	-0.155974	3.77915	1	0.0921325	3.77915	0.945274
A4GNT	-0.474775	-1.63561	0.822593	-0.315429	-1.63561	1	0.159346	-1.63561	0.967099
AA06	0.745457	-2.39608	0.804121	0.725332	-2.39608	0.991415	-0.0201249	-2.39608	1
AAAS	-0.0245475	4.20419	0.993541	-0.158539	4.20419	1	-0.133991	4.20419	0.900633
AACS	-0.733517	6.67693	0.00277229	-1.60431	6.67693	8.54688e-11	-0.870792	6.67693	0.00215448
AACSP1	-0.672341	4.6019	0.0114634	-1.49832	4.6019	8.4748e-09	-0.825978	4.6019	0.00804897
AADAC	0.392886	-0.304202	0.738968	1.19456	-0.304202	0.0174709	0.801672	-0.304202	0.190653
AADACL2	-1.05963	-1.9953	0.528726	-0.229636	-1.9953	1	0.829992	-1.9953	0.760147
AADACL2-AS1	0.900266	-2.72081	0.826141	0.0314054	-2.72081	1	-0.868861	-2.72081	0.883316
AADACL3	0.578402	0.174208	0.276132	-0.357659	0.174208	0.948342	-0.936061	0.174208	0.108438
AADACL4	-0.605548	-1.22922	0.578311	-0.868742	-1.22922	0.591035	-0.263194	-1.22922	0.934089
AADACP1	0.242147	-1.79905	0.935851	-1.38592	-1.79905	0.477812	-1.62806	-1.79905	0.234318
AADAT	-0.264969	1.90639	0.706626	-0.0704921	1.90639	1	0.194477	1.90639	0.859703
AAED1	-0.0210897	4.43126	0.994871	0.323085	4.43126	0.710507	0.344175	4.43126	0.52181
AAGAB	0.194583	4.94131	0.774947	-0.16484	4.94131	0.999999	-0.359422	4.94131	0.494273
AAK1	0.232109	6.64132	0.694178	0.0873663	6.64132	1	-0.144742	6.64132	0.882724
ALAS2	3.56373	4.33607	3.14267e-52	1.23659	4.33607	0.00021131	-2.32714	4.33607	1.0657e-19
AAMP	0.0439093	5.59482	0.979351	-0.0785741	5.59482	1	-0.122483	5.59482	0.909582
AANAT	0.377552	-1.2673	0.843358	0.490111	-1.2673	0.955987	0.112559	-1.2673	0.974896
AAR2	0.0147564	4.32831	0.997674	0.0138205	4.32831	1	-0.00093589	4.32831	1
AARD	0.332422	-1.83308	0.908403	-0.147853	-1.83308	1	-0.480275	-1.83308	0.871568
AARS	0.173	6.98798	0.81317	-0.291431	6.98798	0.784318	-0.464431	6.98798	0.253046
AARS2	-0.128164	4.37468	0.894393	-0.0190208	4.37468	1	0.109143	4.37468	0.926941
AARSD1	0.0235581	3.45671	0.994871	-0.0979333	3.45671	1	-0.121491	3.45671	0.919256
AASDH	-0.210794	4.07218	0.751103	-0.00141912	4.07218	1	0.209375	4.07218	0.799374
AASDHPPT	-0.07912	4.65016	0.952058	-0.0308342	4.65016	1	0.0482858	4.65016	0.975623
AASS	-0.661511	3.93727	0.0131839	-0.433476	3.93727	0.451981	0.228035	3.93727	0.774132
AATBC	0.0302845	0.6949	0.994871	0.451634	0.6949	0.659583	0.42135	0.6949	0.599221
AATF	-0.0353673	4.74413	0.986478	0.0907039	4.74413	1	0.126071	4.74413	0.907689
AATK	0.140639	1.90166	0.899374	-0.190737	1.90166	1	-0.331375	1.90166	0.660497
AATK-AS1	0.07748	-0.975133	0.985706	0.344371	-0.975133	1	0.266891	-0.975133	0.907966
ABALON	0.18663	4.08107	0.799725	0.0742267	4.08107	1	-0.112403	4.08107	0.924089
ABAT	-0.624311	2.81027	0.035935	-0.0849399	2.81027	1	0.539371	2.81027	0.216785
ABCA1	-0.293468	8.54369	0.528363	0.398795	8.54369	0.461449	0.692264	8.54369	0.0177611
ABCA10	-0.448424	4.69145	0.185684	0.851271	4.69145	0.0029325	1.29969	4.69145	9.04914e-08
ABCA11P	-0.325833	3.46924	0.509567	0.742983	3.46924	0.022612	1.06882	3.46924	7.97083e-05
ABCA12	0.520871	0.714687	0.340149	0.702561	0.714687	0.230668	0.181689	0.714687	0.896434
ABCA13	0.0884799	1.32144	0.956488	-0.334189	1.32144	0.854586	-0.422669	1.32144	0.556454
ABCA17P	-0.0535099	-0.897068	0.991503	-0.695185	-0.897068	0.719072	-0.641675	-0.897068	0.646267
ABCA2	0.205223	6.98164	0.746888	-0.0605411	6.98164	1	-0.265764	6.98164	0.688234
ABCA3	0.287636	4.74258	0.561773	0.254807	4.74258	0.877777	-0.032829	4.74258	0.987374
ABCA4	-0.0117483	2.44098	1	0.135684	2.44098	1	0.147432	2.44098	0.900149
ABCA5	-0.494518	5.05115	0.10339	-0.318554	5.05115	0.723301	0.175964	5.05115	0.847913
ABCA6	-0.12701	8.09744	0.891723	0.400891	8.09744	0.463461	0.527902	8.09744	0.130124
ABCA7	-0.042892	5.53168	0.980002	-0.622624	5.53168	0.073551	-0.579732	5.53168	0.104995
ABCA8	-0.0338903	8.09416	0.98659	0.855422	8.09416	0.00167019	0.889312	8.09416	0.00051721
ABCA9	-0.529947	6.4693	0.0601552	0.826706	6.4693	0.00284556	1.35665	6.4693	6.51458e-09
ABCA9-AS1	-0.524085	2.06465	0.18621	0.759259	2.06465	0.036855	1.28334	2.06465	9.52321e-06
ABCB1	0.573005	3.86758	0.0492912	0.00196695	3.86758	1	-0.571038	3.86758	0.141236
ABCB10	0.117949	5.33088	0.904697	0.00234967	5.33088	1	-0.115599	5.33088	0.918855
ABCB11	0.206508	-0.171362	0.889683	-0.204609	-0.171362	1	-0.411116	-0.171362	0.744801
HBZ	3.35303	5.46493	7.26102e-49	0.788802	5.46493	0.0662478	-2.56422	5.46493	5.07127e-23
ABCB5	0.0631004	-0.098418	0.983392	0.0330376	-0.098418	1	-0.0300628	-0.098418	0.998847
ABCB6	-0.0675459	4.76277	0.962854	-0.0745996	4.76277	1	-0.00705374	4.76277	1
ABCB7	-0.129757	4.73986	0.892175	0.0410993	4.73986	1	0.170856	4.73986	0.853277
ABCB8	0.0939967	3.54655	0.936612	-0.384636	3.54655	0.593537	-0.478633	3.54655	0.287922
ABCB9	0.0183229	1.3102	0.997674	0.156398	1.3102	1	0.138075	1.3102	0.927081
ABCC1	0.0101471	6.00433	1	-0.361593	6.00433	0.588597	-0.37174	6.00433	0.454718
ABCC10	-0.0759135	3.9958	0.954307	-0.0488277	3.9958	1	0.0270858	3.9958	0.991998
ABCC11	-0.927404	3.34021	0.0205928	2.60408	3.34021	1.96996e-13	3.53148	3.34021	2.04499e-22
ABCC12	-0.124953	-0.0396445	0.952415	0.540162	-0.0396445	0.631361	0.665115	-0.0396445	0.362665
ABCC13	0.454875	-0.319169	0.617157	0.361331	-0.319169	0.954249	-0.093544	-0.319169	0.968185
ABCC2	-0.252137	1.57278	0.743791	-0.512848	1.57278	0.431605	-0.260711	1.57278	0.787218
ABCC3	0.27307	4.91371	0.598494	0.107432	4.91371	1	-0.165638	4.91371	0.862128
ABCC4	0.407297	3.75799	0.287821	-0.070908	3.75799	1	-0.478205	3.75799	0.28626
ABCC5	0.0517806	5.57934	0.974726	0.16637	5.57934	0.994313	0.114589	5.57934	0.919001
ABCC5-AS1	-0.28446	-0.733642	0.859099	0.110746	-0.733642	1	0.395206	-0.733642	0.796038
ABCC6	-0.314562	1.07134	0.682456	-0.86485	1.07134	0.0607828	-0.550289	1.07134	0.422426
ABCC6P1	-0.299398	-0.95268	0.887586	-0.38117	-0.95268	0.993987	-0.0817718	-0.95268	0.98654
ABCC6P2	0.34217	-1.7353	0.910221	-1.75505	-1.7353	0.437056	-2.09722	-1.7353	0.182617
ABCC8	-0.110705	1.54812	0.935075	-0.599261	1.54812	0.298998	-0.488555	1.54812	0.438697
ABCC9	-0.548306	6.42794	0.04703	-0.41758	6.42794	0.427839	0.130725	6.42794	0.900149
ABCD1	-0.08501	4.21361	0.94631	0.0136447	4.21361	1	0.0986547	4.21361	0.937643
ABCD2	0.198298	6.76424	0.771024	-0.600638	6.76424	0.112184	-0.798936	6.76424	0.0069446
ABCD3	0.24218	5.73162	0.676521	-0.0676551	5.73162	1	-0.309835	5.73162	0.598407
ABCD4	-0.0923604	4.95302	0.935041	-0.0276014	4.95302	1	0.064759	4.95302	0.962619
ABCE1	0.18213	6.06146	0.797632	0.0857608	6.06146	1	-0.0963696	6.06146	0.93683
ABCF1	0.202543	6.38437	0.751812	0.00518538	6.38437	1	-0.197357	6.38437	0.808716
ABCF2	0.37365	5.37686	0.326199	-0.133635	5.37686	1	-0.507285	5.37686	0.197221
ABCF3	0.0638397	4.83808	0.965279	-0.0582866	4.83808	1	-0.122126	4.83808	0.912341
ABCG1	0.0224949	6.34833	0.994871	1.22988	6.34833	6.20378e-07	1.20738	6.34833	1.49557e-06
ABCG2	-0.0507662	6.00528	0.97538	-0.51428	6.00528	0.216999	-0.463514	6.00528	0.262466
ABCG4	0.378359	0.904702	0.558831	0.18986	0.904702	1	-0.188499	0.904702	0.886547
ABCG5	-0.153736	0.771186	0.910394	0.167517	0.771186	1	0.321252	0.771186	0.757315
ABCG8	-0.600931	-0.786522	0.499136	-0.698819	-0.786522	0.657619	-0.0978876	-0.786522	0.97777
ABHD1	-0.0422466	2.28665	0.9839	-0.264913	2.28665	0.916138	-0.222666	2.28665	0.82149
ABHD10	0.323402	2.89781	0.525565	0.341079	2.89781	0.718844	0.0176772	2.89781	0.9994
ABHD11	0.0326386	3.60694	0.989125	0.116222	3.60694	1	0.083583	3.60694	0.951335
ABHD11-AS1	-0.450179	-0.902109	0.720178	0.0558954	-0.902109	1	0.506074	-0.902109	0.761056
ABHD12	0.291705	5.53107	0.5432	-0.0889606	5.53107	1	-0.380666	5.53107	0.443552
ABHD12B	0.674022	-0.192712	0.219547	0.425556	-0.192712	0.888575	-0.248466	-0.192712	0.877126
ABHD13	-0.023734	4.94483	0.994005	0.0140868	4.94483	1	0.0378207	4.94483	0.982621
ABHD14A	0.233421	4.19004	0.709672	0.39423	4.19004	0.524873	0.160809	4.19004	0.869043
ABHD14A-ACY1	-0.161807	5.0892	0.838586	-0.164852	5.0892	0.999399	-0.00304449	5.0892	1
ABHD14B	0.0331555	4.46058	0.987879	0.337284	4.46058	0.668934	0.304128	4.46058	0.619437
ABHD15	0.258202	4.50271	0.650207	-0.00951963	4.50271	1	-0.267722	4.50271	0.703982
ABHD16A	0.211692	5.62731	0.740086	0.0964805	5.62731	1	-0.115211	5.62731	0.918855
ABHD16B	0.0910622	2.61474	0.946198	-0.132913	2.61474	1	-0.223975	2.61474	0.805163
ABHD17A	0.0384891	5.26107	0.983392	-0.0767006	5.26107	1	-0.11519	5.26107	0.919001
ABHD17B	-0.057869	3.76677	0.97338	0.0545404	3.76677	1	0.112409	3.76677	0.925209
ABHD17C	0.237698	3.65895	0.709904	0.0435207	3.65895	1	-0.194177	3.65895	0.834115
ABHD18	-0.131217	3.10398	0.898742	-0.0130758	3.10398	1	0.118141	3.10398	0.924022
ABHD2	0.360266	7.77299	0.352353	-0.117432	7.77299	1	-0.477697	7.77299	0.237552
ABHD3	0.252888	4.34554	0.661611	-0.138382	4.34554	1	-0.39127	4.34554	0.438697
ABHD4	0.340483	4.99004	0.419121	0.323989	4.99004	0.6999	-0.0164939	4.99004	0.9994
ABHD5	0.363758	6.16305	0.346935	0.0149135	6.16305	1	-0.348844	6.16305	0.516636
ABHD6	0.301072	3.94949	0.541477	0.0281093	3.94949	1	-0.272962	3.94949	0.695744
ABHD8	-0.151972	3.50494	0.865135	-0.120553	3.50494	1	0.031419	3.50494	0.989882
ABI1	0.170877	5.98761	0.819576	0.195439	5.98761	0.965552	0.024562	5.98761	0.992168
ABI2	-0.0467539	5.47773	0.978086	0.124953	5.47773	1	0.171707	5.47773	0.849728
ABI3	-0.0547803	2.37432	0.976216	0.027764	2.37432	1	0.0825443	2.37432	0.95593
ABI3BP	-0.167946	7.50577	0.824383	0.544	7.50577	0.156802	0.711947	7.50577	0.0120212
ABL1	-0.00341434	6.93826	1	0.109381	6.93826	1	0.112796	6.93826	0.919132
ABL2	0.0657749	6.44827	0.963213	0.0520708	6.44827	1	-0.0137041	6.44827	0.999783
ABLIM1	0.147712	8.06213	0.859444	0.408803	8.06213	0.456702	0.261091	8.06213	0.680886
ABLIM2	0.610783	2.44108	0.0481431	0.107043	2.44108	1	-0.50374	2.44108	0.287922
ABLIM3	-0.367915	5.9298	0.351911	-0.96477	5.9298	0.00040527	-0.596855	5.9298	0.092753
ABO	-0.0988055	0.383966	0.963213	0.129268	0.383966	1	0.228073	0.383966	0.87573
ABR	0.0100392	6.53454	1	-0.0983523	6.53454	1	-0.108391	6.53454	0.924237
ABRA	0.292017	0.576874	0.750018	0.178147	0.576874	1	-0.11387	0.576874	0.952691
ABRACL	0.569389	2.57842	0.0712843	-0.179552	2.57842	1	-0.748941	2.57842	0.0317367
ABT1	0.136379	3.88877	0.885406	0.102556	3.88877	1	-0.0338226	3.88877	0.987089
ABTB1	-0.0562758	4.30945	0.974285	0.0354244	4.30945	1	0.0917001	4.30945	0.943063
ABTB2	0.506077	3.90654	0.111856	0.113649	3.90654	1	-0.392427	3.90654	0.43731
ACAA1	0.0741377	4.97057	0.954981	-0.237746	4.97057	0.909026	-0.311884	4.97057	0.610983
ACAA2	0.121354	6.29284	0.90009	-0.0235366	6.29284	1	-0.14489	6.29284	0.886029
ACACA	-1.38406	8.83436	6.00344e-11	-1.93648	8.83436	1.89644e-15	-0.55242	8.83436	0.133036
ACACB	-0.501655	10.1464	0.0906094	-0.842044	10.1464	0.00349002	-0.340389	10.1464	0.534419
ACAD10	-0.495102	4.0969	0.118034	-0.47759	4.0969	0.327504	0.0175121	4.0969	0.999359
ACAD11	0.417553	5.19842	0.224424	0.126385	5.19842	1	-0.291168	5.19842	0.64313
ACAD8	-0.22947	3.46451	0.731869	0.172786	3.46451	0.998302	0.402256	3.46451	0.433745
ACAD9	0.117523	5.99752	0.906969	-0.847413	5.99752	0.00337943	-0.964936	5.99752	0.00042656
ACADL	-0.316213	3.74849	0.514599	-0.256029	3.74849	0.894617	0.0601835	3.74849	0.966687
ACADM	0.325373	6.83699	0.456549	0.168901	6.83699	0.992885	-0.156472	6.83699	0.873439
ACADS	0.143422	5.4049	0.871266	-0.336562	5.4049	0.673462	-0.479984	5.4049	0.24244
ACADSB	-0.383966	5.94119	0.30382	-0.273638	5.94119	0.833823	0.110328	5.94119	0.922582
ACADVL	0.354574	7.4479	0.363724	0.0599132	7.4479	1	-0.294661	7.4479	0.629367
ACAN	-2.54886	3.57515	5.38237e-30	-2.73976	3.57515	1.90315e-21	-0.190898	3.57515	0.872169
ACAP1	0.14089	2.13921	0.896475	0.0590621	2.13921	1	-0.0818278	2.13921	0.957367
ACAP2	0.152714	6.83019	0.850242	0.0436107	6.83019	1	-0.109103	6.83019	0.923341
ACAP3	0.00830164	5.63776	1	-0.0552785	5.63776	1	-0.0635802	5.63776	0.962619
ACAT1	0.115318	6.53697	0.908667	-0.206507	6.53697	0.955987	-0.321825	6.53697	0.571445
ACAT2	-0.0795607	5.12641	0.952004	-0.453105	5.12641	0.367232	-0.373544	5.12641	0.464739
ACBD3	0.0359664	6.02742	0.985839	-0.0323772	6.02742	1	-0.0683436	6.02742	0.960286
ACBD4	0.087019	3.77922	0.945713	0.0727066	3.77922	1	-0.0143124	3.77922	0.999783
ACBD5	-0.113572	6.32574	0.909674	-0.0575379	6.32574	1	0.0560342	6.32574	0.967723
ACBD6	-0.00921921	4.22756	1	0.0342217	4.22756	1	0.0434409	4.22756	0.979302
ACBD7	-0.0207635	-1.8389	1	0.252956	-1.8389	1	0.27372	-1.8389	0.946857
ACCS	-0.0846534	3.48038	0.949904	0.086828	3.48038	1	0.171481	3.48038	0.863076
ACCSL	0.0475066	0.762211	0.98659	0.27365	0.762211	0.966793	0.226144	0.762211	0.865779
ACD	-0.195689	1.89197	0.825023	0.0692884	1.89197	1	0.264978	1.89197	0.765435
ACE	-0.491094	6.83316	0.0973199	-0.000962971	6.83316	1	0.490131	6.83316	0.199187
ACE2	0.253408	1.35822	0.756449	-0.385829	1.35822	0.810303	-0.639237	1.35822	0.235491
ACER1	-0.285667	-1.26996	0.898742	0.114245	-1.26996	1	0.399912	-1.26996	0.864495
ACER2	0.213532	5.21651	0.740985	-0.00177814	5.21651	1	-0.21531	5.21651	0.791822
ACER3	0.296425	6.87436	0.531091	-0.156207	6.87436	1	-0.452633	6.87436	0.29058
ACHE	-0.312774	0.64853	0.711563	0.237127	0.64853	0.9896	0.549901	0.64853	0.412167
ACIN1	-0.121471	6.67077	0.899181	0.0512138	6.67077	1	0.172685	6.67077	0.844607
ACKR1	0.182271	4.98663	0.804179	-0.13395	4.98663	1	-0.316221	4.98663	0.587561
ACKR2	0.435206	4.18692	0.229051	0.595996	4.18692	0.133931	0.16079	4.18692	0.869108
ACKR3	0.330759	7.45148	0.442288	0.546364	7.45148	0.15985	0.215605	7.45148	0.769986
ACKR4	0.0415437	2.71989	0.9839	0.191387	2.71989	0.992885	0.149843	2.71989	0.895963
ACLY	-1.46899	9.25012	9.27326e-13	-2.30998	9.25012	1.65202e-20	-0.840985	9.25012	0.00258755
ACMSD	-0.335299	-1.1781	0.850545	-0.37914	-1.1781	0.993867	-0.0438415	-1.1781	0.998275
ACO1	0.145119	7.48116	0.86424	-0.225498	7.48116	0.92645	-0.370618	7.48116	0.46211
ACO2	-0.311566	7.41877	0.492965	-0.498192	7.41877	0.241825	-0.186626	7.41877	0.827067
ACOD1	1.25842	-0.782268	0.0112907	0.577789	-0.782268	0.889834	-0.680628	-0.782268	0.5891
ACOT1	0.0244092	4.24462	0.993729	-0.354274	4.24462	0.641905	-0.378683	4.24462	0.470895
ACOT11	1.06553	1.66431	5.95192e-05	0.325652	1.66431	0.864299	-0.739882	1.66431	0.0720405
ACOT12	0.102418	-1.15496	0.979303	0.519535	-1.15496	0.91893	0.417117	-1.15496	0.833996
ACOT13	-0.0583862	4.70156	0.972135	-0.243237	4.70156	0.903424	-0.184851	4.70156	0.834616
ACOT2	0.0175274	4.27206	0.997569	-0.339058	4.27206	0.682758	-0.356585	4.27206	0.518681
ACOT4	0.161153	1.24256	0.894932	-0.200019	1.24256	1	-0.361172	1.24256	0.689815
ACOT6	0.0254862	2.27171	0.994871	-0.173857	2.27171	1	-0.199343	2.27171	0.850738
ACOT7	0.348929	2.81684	0.459531	-0.0756383	2.81684	1	-0.424568	2.81684	0.425105
ACOT8	-0.109859	3.32036	0.920059	-0.114017	3.32036	1	-0.00415825	3.32036	1
ACOT9	0.260153	5.37252	0.631262	0.135972	5.37252	1	-0.124181	5.37252	0.908451
ACOX1	0.160855	6.32396	0.834524	-0.0910817	6.32396	1	-0.251937	6.32396	0.718721
ACOX2	-0.315742	5.00227	0.494714	-0.24693	5.00227	0.899144	0.0688124	5.00227	0.961451
ACOX3	0.0454604	3.98398	0.979351	0.0567557	3.98398	1	0.0112953	3.98398	1
ACOXL	-0.295796	0.263644	0.783002	0.471712	0.263644	0.708108	0.767507	0.263644	0.190652
ACP1	0.182013	5.35887	0.800238	0.0434546	5.35887	1	-0.138559	5.35887	0.891482
ACP2	0.0441887	4.94486	0.979601	0.100501	4.94486	1	0.0563124	4.94486	0.967901
ACP5	-0.230832	4.89323	0.711341	-0.173963	4.89323	0.992362	0.0568698	4.89323	0.967888
ACP6	0.048775	4.18195	0.977472	0.0970361	4.18195	1	0.0482611	4.18195	0.976556
ACP7	0.0725108	-0.375985	0.982178	0.537557	-0.375985	0.713543	0.465046	-0.375985	0.682279
ACPP	0.210896	2.37326	0.804179	0.8764	2.37326	0.0124008	0.665504	2.37326	0.101962
ACPT	-0.022546	-0.538278	0.998664	0.227015	-0.538278	1	0.249561	-0.538278	0.898312
ACR	-0.161778	-0.867797	0.952004	0.676468	-0.867797	0.656158	0.838246	-0.867797	0.37529
ACRBP	0.433104	-0.492952	0.668234	0.174368	-0.492952	1	-0.258736	-0.492952	0.89253
ACRC	-0.21425	1.4249	0.816892	-0.340126	1.4249	0.845425	-0.125877	1.4249	0.936651
ACRV1	-0.0522645	-0.719809	0.990713	-0.423239	-0.719809	0.953314	-0.370975	-0.719809	0.842469
ACSBG1	0.0687935	2.03469	0.969909	0.275622	2.03469	0.900166	0.206828	2.03469	0.837216
ACSBG2	-0.109844	0.723424	0.950326	0.00195692	0.723424	1	0.111801	0.723424	0.951636
ACSF2	-0.710209	6.22064	0.00379201	-0.561103	6.22064	0.140077	0.149106	6.22064	0.880335
ACSF3	0.066817	3.91868	0.964471	0.138354	3.91868	1	0.0715375	3.91868	0.959911
ACSL1	-0.183358	9.75914	0.798308	-1.0485	9.75914	6.03019e-05	-0.865146	9.75914	0.00162489
ACSL3	-0.0400575	5.63796	0.98298	-0.397606	5.63796	0.50356	-0.357548	5.63796	0.484435
ACSL4	0.220389	6.41902	0.721542	-0.0325676	6.41902	1	-0.252956	6.41902	0.716842
ACSL5	0.594386	5.66012	0.0241549	0.521964	5.66012	0.188812	-0.0724229	5.66012	0.957008
ACSL6	0.149296	3.03638	0.876864	-0.562318	3.03638	0.240915	-0.711614	3.03638	0.0507439
ACSM1	-0.33637	-0.90807	0.827641	-0.0263793	-0.90807	1	0.30999	-0.90807	0.881245
ACSM2A	-0.783708	0.377101	0.0873961	-1.17167	0.377101	0.0194683	-0.387959	0.377101	0.773617
ACSM2B	-0.786941	0.320211	0.089657	-1.14114	0.320211	0.0277538	-0.354196	0.320211	0.810761
ACSM3	-0.28912	4.38122	0.576531	0.300963	4.38122	0.786327	0.590083	4.38122	0.092753
ACSM4	0.105607	0.750574	0.952183	0.154713	0.750574	1	0.0491068	0.750574	0.984857
ACSM5	-0.738339	4.37548	0.00362816	-0.740552	4.37548	0.023844	-0.00221301	4.37548	1
ACSM6	-0.647898	-2.15488	0.825534	0.985457	-2.15488	0.774357	1.63336	-2.15488	0.277754
ACSS1	-0.210387	4.32173	0.749749	0.0854126	4.32173	1	0.2958	4.32173	0.636268
ACSS2	-0.490194	8.17354	0.111748	-1.29187	8.17354	5.05469e-07	-0.801675	8.17354	0.00563776
ACSS3	-0.773261	6.89848	0.0011869	-0.533625	6.89848	0.183194	0.239636	6.89848	0.743486
ACTA1	0.0627631	3.20881	0.970184	-0.221653	3.20881	0.953314	-0.284416	3.20881	0.69074
ACTA2	-0.169302	6.85467	0.824282	-0.161765	6.85467	1	0.00753754	6.85467	1
ACTA2-AS1	-0.104552	5.80443	0.921449	-0.148386	5.80443	1	-0.0438344	5.80443	0.97777
ACTB	0.0858235	10.6324	0.940357	-0.0675222	10.6324	1	-0.153346	10.6324	0.872115
ACTBL2	0.0551914	0.175654	0.986478	0.88282	0.175654	0.0846389	0.827628	0.175654	0.11193
ACTC1	0.121048	2.36054	0.913588	0.103863	2.36054	1	-0.0171856	2.36054	0.999783
ACTG1	0.0651478	9.99257	0.963213	0.0905549	9.99257	1	0.0254071	9.99257	0.991998
ACTG1P17	0.108905	0.883772	0.946198	0.0440844	0.883772	1	-0.0648209	0.883772	0.974977
ACTG1P20	-0.11657	3.15472	0.912676	-0.0619075	3.15472	1	0.0546621	3.15472	0.972392
ACTG1P4	0.202216	2.85319	0.787205	0.174205	2.85319	1	-0.0280106	2.85319	0.991998
ACTG2	-0.57608	3.20423	0.0681469	0.842874	3.20423	0.0043714	1.41895	3.20423	6.36696e-08
ACTL10	0.0745392	0.687324	0.974285	0.0716298	0.687324	1	-0.00290935	0.687324	1
ACTL6A	-0.0350043	3.80168	0.98659	-0.122934	3.80168	1	-0.0879296	3.80168	0.947576
ACTL6B	0.0522742	-1.06736	0.993625	0.250228	-1.06736	1	0.197954	-1.06736	0.945657
ACTL7A	0.311358	-0.311981	0.792115	0.2568	-0.311981	1	-0.0545574	-0.311981	0.988972
ACTL7B	0.288383	-0.816759	0.863347	0.060822	-0.816759	1	-0.227561	-0.816759	0.922582
ACTL8	-0.0314418	-0.26136	0.996905	0.00387608	-0.26136	1	0.0353179	-0.26136	0.99702
ACTL9	-0.397391	-1.14579	0.785344	-0.675513	-1.14579	0.785745	-0.278122	-1.14579	0.919813
ACTN1	0.00685018	7.27003	1	-0.0631898	7.27003	1	-0.07004	7.27003	0.959911
ACTN1-AS1	0.518713	-1.57772	0.740448	-0.96517	-1.57772	0.737909	-1.48388	-1.57772	0.204454
ACTN2	-0.303195	1.37619	0.67955	-0.363336	1.37619	0.814444	-0.0601412	1.37619	0.976767
ACTN3	-0.202885	3.73528	0.774409	-0.154594	3.73528	1	0.0482904	3.73528	0.976598
ACTN4	0.216349	7.65235	0.726925	0.024022	7.65235	1	-0.192327	7.65235	0.816064
ACTR10	-0.00210148	5.11375	1	-0.0311826	5.11375	1	-0.0290811	5.11375	0.990727
ACTR1A	0.245259	6.64868	0.664253	-0.183766	6.64868	0.978988	-0.429025	6.64868	0.326483
ACTR1B	-0.0389067	5.49397	0.983392	-0.0170098	5.49397	1	0.0218969	5.49397	0.995204
ACTR2	0.187659	7.85348	0.782023	-0.0527491	7.85348	1	-0.240408	7.85348	0.7357
ACTR3	0.252314	7.40144	0.644028	0.0478816	7.40144	1	-0.204433	7.40144	0.79473
ACTR3B	-0.145559	3.11145	0.878354	-0.27245	3.11145	0.877777	-0.126891	3.11145	0.915036
ACTR3BP2	0.103615	-1.0962	0.97711	0.401284	-1.0962	0.985748	0.297669	-1.0962	0.898985
ACTR3BP5	0.0333091	-0.895935	0.997569	0.0692852	-0.895935	1	0.0359761	-0.895935	0.999349
ACTR3C	-0.153796	1.91416	0.885295	-0.240728	1.91416	0.958455	-0.0869323	1.91416	0.956717
ACTR5	0.0851574	3.11913	0.950326	0.247892	3.11913	0.912376	0.162735	3.11913	0.875444
ACTR6	0.0405805	2.86854	0.98393	0.143387	2.86854	1	0.102807	2.86854	0.938552
ACTR8	-0.100246	5.02775	0.924926	-0.0746911	5.02775	1	0.0255551	5.02775	0.991998
ACTRT1	-0.121575	-1.49083	0.977068	-0.43999	-1.49083	0.996732	-0.318416	-1.49083	0.918882
ACTRT2	0.221522	-0.390679	0.894393	0.330345	-0.390679	0.978988	0.108823	-0.390679	0.963524
ACTRT3	0.0104299	1.17295	1	-0.0700207	1.17295	1	-0.0804507	1.17295	0.963524
ACVR1	-0.387215	5.37741	0.289448	-0.331992	5.37741	0.680884	0.055223	5.37741	0.968185
ACVR1B	0.271158	4.55905	0.608585	0.356555	4.55905	0.612931	0.0853971	4.55905	0.948398
ACVR1C	-0.42948	7.73679	0.204643	0.180451	7.73679	0.987778	0.609931	7.73679	0.0608085
ACVR2A	-0.186519	4.8186	0.795642	0.0858263	4.8186	1	0.272346	4.8186	0.682279
ACVR2B	-0.154751	4.48102	0.854657	0.22059	4.48102	0.938994	0.375341	4.48102	0.463077
ACVR2B-AS1	-0.14781	-0.396228	0.947248	-0.108863	-0.396228	1	0.0389471	-0.396228	0.996887
ACVRL1	-0.0656209	6.29008	0.963213	-0.0606131	6.29008	1	0.00500773	6.29008	1
ACY1	-0.342682	4.66354	0.432631	-0.377093	4.66354	0.568257	-0.0344112	4.66354	0.986173
ACY3	-1.18757	-1.8124	0.326434	-0.198213	-1.8124	1	0.989362	-1.8124	0.645315
ACYP1	0.193216	2.04904	0.825534	0.220702	2.04904	0.973567	0.0274859	2.04904	0.993027
ACYP2	0.241024	3.15486	0.715235	-0.0945854	3.15486	1	-0.33561	3.15486	0.589645
ADA	-0.493975	4.33319	0.113342	-0.0952191	4.33319	1	0.398756	4.33319	0.427062
ADAD1	0.262054	-0.122878	0.833661	-0.046988	-0.122878	1	-0.309042	-0.122878	0.824662
ADAD2	-0.0538588	-0.279444	0.987763	0.0491717	-0.279444	1	0.10303	-0.279444	0.965466
ADAL	0.0845537	3.33812	0.950076	-0.167062	3.33812	1	-0.251616	3.33812	0.746138
ADAM10	0.164716	6.55349	0.827015	-0.147741	6.55349	1	-0.312457	6.55349	0.585313
ADAM11	-0.441814	1.59768	0.348753	-0.777238	1.59768	0.0691462	-0.335424	1.59768	0.694632
ADAM12	-1.87499	6.22575	1.1417e-18	-2.35092	6.22575	1.31602e-20	-0.475925	6.22575	0.29605
ADAM15	0.145227	6.84065	0.862954	-0.229113	6.84065	0.91893	-0.37434	6.84065	0.446518
ADAM17	0.319999	5.84633	0.466019	-0.0932435	5.84633	1	-0.413243	5.84633	0.365689
ADAM18	0.321205	0.0366408	0.776283	0.292876	0.0366408	0.999399	-0.028329	0.0366408	0.99968
ADAM19	-0.69439	4.34611	0.00626264	-1.0222	4.34611	0.000252712	-0.327807	4.34611	0.587192
ADAM1A	-0.298476	1.82646	0.651169	0.0463001	1.82646	1	0.344776	1.82646	0.645057
ADAM2	-0.668303	-1.13532	0.499019	-0.602629	-1.13532	0.820265	0.0656748	-1.13532	0.991333
ADAM20	-0.15644	1.96212	0.881837	-0.601632	1.96212	0.259929	-0.445192	1.96212	0.480234
ADAM20P1	-0.217189	4.31646	0.740448	-0.50141	4.31646	0.286617	-0.284221	4.31646	0.674198
ADAM21	0.0864802	0.523938	0.969644	-0.192028	0.523938	1	-0.278508	0.523938	0.829554
ADAM21P1	0.251473	0.148755	0.832808	-0.100022	0.148755	1	-0.351496	0.148755	0.7742
ADAM22	-0.434685	6.25886	0.204016	-0.360281	6.25886	0.62007	0.0744044	6.25886	0.95593
ADAM23	-0.294612	2.12635	0.635981	0.0194521	2.12635	1	0.314064	2.12635	0.677933
ADAM28	-0.158035	0.528403	0.910394	-0.222441	0.528403	1	-0.0644065	0.528403	0.979302
ADAM29	-0.153853	-0.622508	0.948719	0.402968	-0.622508	0.931281	0.556821	-0.622508	0.62204
ADAM30	-0.0214883	-0.831933	1	-0.0988168	-0.831933	1	-0.0773286	-0.831933	0.984066
ADAM32	0.238756	1.74586	0.756065	0.236498	1.74586	0.965989	-0.00225845	1.74586	1
ADAM33	0.107957	4.11048	0.920707	0.955781	4.11048	0.000390449	0.847824	4.11048	0.00367202
ADAM3A	-0.193237	-0.679368	0.923675	0.0394475	-0.679368	1	0.232685	-0.679368	0.918855
ADAM5	0.718614	-1.56503	0.611132	1.1783	-1.56503	0.323236	0.459683	-1.56503	0.822586
ADAM6	-0.0149102	0.29377	1	-0.243197	0.29377	1	-0.228287	0.29377	0.882078
ADAM7	-0.172981	-0.623477	0.933268	-0.107317	-0.623477	1	0.0656638	-0.623477	0.986921
ADAM8	0.238872	2.26571	0.737256	-0.303776	2.26571	0.855823	-0.542648	2.26571	0.250225
ADAM9	0.105757	7.36413	0.916743	0.0991565	7.36413	1	-0.0066004	7.36413	1
ADAMDEC1	0.287108	2.61958	0.711341	-2.12447	2.61958	4.91136e-11	-2.41158	2.61958	5.72689e-14
ADAMTS1	0.186101	7.16235	0.786984	0.229496	7.16235	0.916829	0.0433955	7.16235	0.97777
ADAMTS10	-0.379408	5.01961	0.320458	0.136143	5.01961	1	0.51555	5.01961	0.179056
ADAMTS12	-0.490632	6.32028	0.097877	-0.19121	6.32028	0.970288	0.299422	6.32028	0.613046
ADAMTS13	-0.120391	1.85585	0.922409	-0.131051	1.85585	1	-0.0106599	1.85585	1
ADAMTS14	-1.51462	4.29751	4.97581e-13	-1.55532	4.29751	8.57757e-10	-0.0406963	4.29751	0.981178
ADAMTS15	0.514603	6.04119	0.0805897	0.0138591	6.04119	1	-0.500744	6.04119	0.210274
ADAMTS16	-1.10081	5.08834	4.13e-07	-1.38292	5.08834	3.21039e-08	-0.282106	5.08834	0.672796
ADAMTS17	-0.806514	2.30591	0.00290609	-0.826647	2.30591	0.0221749	-0.0201336	2.30591	0.999371
ADAMTS18	0.0575377	2.43775	0.974726	-0.218568	2.43775	0.968752	-0.276105	2.43775	0.734071
ADAMTS19	0.0330685	0.567039	0.993818	0.0604737	0.567039	1	0.0274052	0.567039	0.997757
ADAMTS19-AS1	0.23892	-1.10304	0.918022	0.656772	-1.10304	0.762297	0.417853	-1.10304	0.818151
ADAMTS2	-0.440122	7.94756	0.176137	-0.415355	7.94756	0.447449	0.0247667	7.94756	0.992116
ADAMTS20	0.215599	0.15809	0.872815	0.2554	0.15809	1	0.0398009	0.15809	0.991998
ADAMTS3	-0.119488	3.60733	0.909859	0.550359	3.60733	0.185604	0.669846	3.60733	0.0365639
ADAMTS4	-0.030489	2.433	0.991743	-0.951051	2.433	0.00409575	-0.920562	2.433	0.00495973
ADAMTS5	1.34473	9.15975	2.59922e-11	0.736603	9.15975	0.0131321	-0.608131	9.15975	0.0745285
ADAMTS6	-0.168146	4.24759	0.838168	-0.644904	4.24759	0.0726144	-0.476757	4.24759	0.263435
ADAMTS7	-0.579992	3.05714	0.0537533	-0.0373072	3.05714	1	0.542684	3.05714	0.200597
ADAMTS7P1	-0.593082	2.90822	0.0488303	5.32796e-05	2.90822	1	0.593135	2.90822	0.138033
ADAMTS8	0.234222	1.55887	0.777575	0.753064	1.55887	0.056985	0.518842	1.55887	0.320632
ADAMTS9	-0.0460929	6.5532	0.978437	-0.555352	6.5532	0.151797	-0.509259	6.5532	0.182182
ADAMTS9-AS1	-0.134849	3.2989	0.893241	-0.172501	3.2989	1	-0.0376511	3.2989	0.984254
ADAMTS9-AS2	-0.391384	2.32919	0.419561	0.108505	2.32919	1	0.499888	2.32919	0.331992
ADAMTSL1	-0.699977	5.83897	0.00397671	0.0180117	5.83897	1	0.717988	5.83897	0.0142561
ADAMTSL2	0.51073	1.44049	0.228473	-0.217911	1.44049	0.998434	-0.728641	1.44049	0.102607
ADAMTSL3	0.401368	4.31437	0.283253	0.0360046	4.31437	1	-0.365363	4.31437	0.493581
ADAMTSL4	0.047343	6.12019	0.97749	0.344217	6.12019	0.631629	0.296874	6.12019	0.613046
ADAMTSL4-AS1	0.154649	2.20553	0.878424	0.154292	2.20553	1	-0.00035698	2.20553	1
ADAMTSL5	0.207677	3.59997	0.763286	0.440176	3.59997	0.429539	0.232498	3.59997	0.766837
ADAP1	0.2013	4.03304	0.769754	-0.396073	4.03304	0.551485	-0.597373	4.03304	0.100349
HBD	3.14326	7.94266	2.21585e-47	1.28352	7.94266	3.6297e-05	-1.85974	7.94266	5.32233e-13
ADAR	0.0753645	7.39204	0.952348	0.0293632	7.39204	1	-0.0460013	7.39204	0.976595
ADARB1	-0.00984542	4.89856	1	-0.182604	4.89856	0.98807	-0.172758	4.89856	0.853246
ADARB2	-0.155899	1.02039	0.903315	0.163194	1.02039	1	0.319093	1.02039	0.743011
ADAT1	0.0684883	2.53164	0.967491	0.0204433	2.53164	1	-0.048045	2.53164	0.979193
ADAT2	0.128455	2.00992	0.91015	-0.341694	2.00992	0.795124	-0.470149	2.00992	0.404328
ADAT3	-0.268648	2.03126	0.690324	-0.287741	2.03126	0.886196	-0.0190934	2.03126	0.99954
ADCK1	0.387072	2.34142	0.389169	-0.0885292	2.34142	1	-0.475601	2.34142	0.360736
ADCK2	-0.1996	4.27532	0.771377	-0.21324	4.27532	0.951725	-0.0136402	4.27532	0.999837
ADCK3	-0.871992	6.24802	0.000151181	-0.985944	6.24802	0.000279319	-0.113952	6.24802	0.921802
ADCK4	-0.198206	4.20559	0.774541	-0.0733064	4.20559	1	0.124899	4.20559	0.910609
ADCK5	-0.1476	3.09113	0.875831	-0.0567231	3.09113	1	0.0908766	3.09113	0.948023
ADCY1	-0.355354	3.3834	0.437193	0.627904	3.3834	0.0895343	0.983258	3.3834	0.000344473
ADCY10	-1.25077	4.3451	1.02637e-08	-1.96968	4.3451	3.67995e-14	-0.718911	4.3451	0.0444856
ADCY10P1	-0.0327069	2.62873	0.990242	-0.119011	2.62873	1	-0.0863041	2.62873	0.95251
ADCY2	-0.176858	1.26941	0.878552	0.486794	1.26941	0.520646	0.663653	1.26941	0.153385
ADCY3	0.116389	4.69832	0.908102	-0.180214	4.69832	0.987778	-0.296603	4.69832	0.638251
ADCY4	-0.0989026	4.50546	0.928466	-0.437541	4.50546	0.416281	-0.338638	4.50546	0.55961
ADCY5	-0.0702691	5.34813	0.959449	-0.719635	5.34813	0.0304949	-0.649366	5.34813	0.0583879
ADCY6	-0.00341771	7.11023	1	-0.275363	7.11023	0.826054	-0.271946	7.11023	0.676345
ADCY7	0.0162059	6.45119	0.997674	-0.113209	6.45119	1	-0.129415	6.45119	0.900149
ADCY8	0.497753	0.787527	0.319508	0.0783949	0.787527	1	-0.419358	0.787527	0.598939
ADCY9	-0.109523	4.86527	0.914461	0.184924	4.86527	0.980831	0.294447	4.86527	0.626796
ADCYAP1	0.132141	2.6463	0.902985	0.472013	2.6463	0.389449	0.339873	2.6463	0.598939
ADCYAP1R1	-0.328931	2.4695	0.557097	0.869468	2.4695	0.00495537	1.1984	2.4695	3.59186e-05
ADD1	0.0313741	7.79693	0.988519	0.253717	7.79693	0.867424	0.222343	7.79693	0.762037
ADD2	0.353149	1.85777	0.532777	0.519758	1.85777	0.369659	0.166609	1.85777	0.881742
ADD3	-0.0392784	7.79015	0.983357	0.383317	7.79015	0.522622	0.422595	7.79015	0.308086
ADD3-AS1	-0.0391388	2.21783	0.98659	0.273998	2.21783	0.900903	0.313137	2.21783	0.661521
ADGB	-0.596553	-0.347546	0.428821	-0.0519691	-0.347546	1	0.544584	-0.347546	0.624065
ADGRA1	0.227481	0.610529	0.825023	-0.0487906	0.610529	1	-0.276272	0.610529	0.814162
ADGRA1-AS1	0.393973	-2.34888	0.930384	0.110859	-2.34888	1	-0.283114	-2.34888	0.960425
ADGRA2	-0.388092	7.12852	0.278933	0.129915	7.12852	1	0.518007	7.12852	0.143428
ADGRA3	0.281898	5.87754	0.572106	0.217067	5.87754	0.938994	-0.0648309	5.87754	0.96257
ADGRB1	0.143655	0.569338	0.918965	-0.118233	0.569338	1	-0.261888	0.569338	0.835034
ADGRB2	0.550562	3.28347	0.0703424	0.382564	3.28347	0.591431	-0.167999	3.28347	0.872082
ADGRB3	-0.793182	3.38661	0.00248541	0.113842	3.38661	1	0.907024	3.38661	0.00234183
ADGRD1	-0.262903	6.0366	0.626086	0.254832	6.0366	0.879185	0.517735	6.0366	0.146245
ADGRE1	0.046339	1.97254	0.98298	-0.0723341	1.97254	1	-0.118673	1.97254	0.934925
HBB	3.11214	10.9748	1.01735e-46	1.26455	10.9748	4.63923e-05	-1.8476	10.9748	5.70627e-13
ADGRE3	0.0699823	-0.466953	0.983392	0.581733	-0.466953	0.651757	0.511751	-0.466953	0.62242
ADGRE4P	0.633886	0.982789	0.145052	0.789338	0.982789	0.119241	0.155452	0.982789	0.918891
ADGRE5	0.412246	6.60873	0.221864	-0.10367	6.60873	1	-0.515916	6.60873	0.167475
ADGRF1	-0.00731161	0.382401	1	-0.625132	0.382401	0.463461	-0.617821	0.382401	0.407053
ADGRF2	-0.0804424	0.743832	0.970576	-0.333892	0.743832	0.906123	-0.25345	0.743832	0.846606
ADGRF3	-0.257184	4.73234	0.647214	0.0213569	4.73234	1	0.278541	4.73234	0.669407
ADGRF4	-0.124812	0.114661	0.950329	0.284849	0.114661	0.975996	0.409662	0.114661	0.69487
ADGRF5	0.0214305	7.04331	0.994871	-0.568312	7.04331	0.127351	-0.589742	7.04331	0.087993
ADGRG1	0.134485	4.33676	0.887737	-0.30121	4.33676	0.786327	-0.435695	4.33676	0.359996
ADGRG2	0.046765	4.74505	0.978437	-0.084532	4.74505	1	-0.131297	4.74505	0.900633
ADGRG3	-0.48234	0.738323	0.479464	1.07221	0.738323	0.0061314	1.55455	0.738323	1.36907e-05
ADGRG4	-0.0101288	0.401217	1	-0.195382	0.401217	1	-0.185254	0.401217	0.908602
ADGRG5	0.10128	0.877942	0.952181	-0.207331	0.877942	1	-0.308611	0.877942	0.762561
ADGRG6	0.234267	5.36671	0.701999	0.213021	5.36671	0.953345	-0.0212456	5.36671	0.995936
ADGRG7	0.241398	-0.803601	0.899645	-0.053483	-0.803601	1	-0.294881	-0.803601	0.886577
ADGRL1	0.0187767	6.0405	0.996652	0.0520683	6.0405	1	0.0332916	6.0405	0.98661
ADGRL2	-0.104511	7.11314	0.918022	-0.355707	7.11314	0.599664	-0.251196	7.11314	0.717823
ADGRL3	-0.199223	5.53491	0.767914	-0.18134	5.53491	0.988522	0.0178835	5.53491	0.998676
ADGRL3-AS1	-0.255565	-1.11424	0.904029	-0.745084	-1.11424	0.758214	-0.489519	-1.11424	0.82149
ADGRL4	0.173531	6.25921	0.815739	-0.507979	6.25921	0.227143	-0.68151	6.25921	0.0287551
ADGRV1	-0.195975	1.53639	0.838586	0.310343	1.53639	0.866392	0.506318	1.53639	0.3663
ADH1A	-1.81331	8.2209	1.1666e-18	-0.339087	8.2209	0.642849	1.47423	8.2209	1.03229e-09
ADH1B	-1.79367	10.8082	1.48754e-18	-0.373344	10.8082	0.545086	1.42033	10.8082	2.6699e-09
ADH1C	-1.29825	7.18063	5.06262e-10	0.333071	7.18063	0.657349	1.63132	7.18063	2.12597e-12
ADH4	-0.0826231	1.11982	0.970995	-0.421527	1.11982	0.748096	-0.338904	1.11982	0.730626
ADH5	-0.220565	6.83557	0.723838	-0.205258	6.83557	0.955987	0.0153067	6.83557	0.999783
ADH6	-2.47426	3.00792	1.22191e-19	0.153553	3.00792	1	2.62781	3.00792	3.84086e-17
ADH7	-0.6202	4.84313	0.024064	0.639568	4.84313	0.06917	1.25977	4.84313	2.82771e-07
ADHFE1	-1.17423	3.42929	5.3916e-07	-0.53841	3.42929	0.244743	0.635824	3.42929	0.0863459
ADI1	0.184041	4.80137	0.799837	-0.0593241	4.80137	1	-0.243365	4.80137	0.741357
ADIG	-0.595887	-1.26323	0.619171	-0.103988	-1.26323	1	0.491898	-1.26323	0.811703
ADIPOQ	0.459366	10.2099	0.139868	0.387477	10.2099	0.520152	-0.0718888	10.2099	0.958076
ADIPOQ-AS1	0.430635	10.0251	0.191175	0.36763	10.0251	0.575876	-0.0630046	10.0251	0.963366
ADIPOR1	0.208343	6.52794	0.742698	-0.045755	6.52794	1	-0.254098	6.52794	0.710765
ADIPOR2	0.0205755	8.14714	0.994871	-0.397575	8.14714	0.499663	-0.41815	8.14714	0.36384
ADIRF	0.490978	7.68726	0.0978778	0.681109	7.68726	0.0306474	0.190131	7.68726	0.822349
ADK	0.418653	5.28375	0.219845	0.0406706	5.28375	1	-0.377982	5.28375	0.458868
ADM	-0.175922	5.76007	0.811956	0.379202	5.76007	0.528058	0.555124	5.76007	0.119815
ADM2	-0.153849	0.891603	0.904571	-0.463109	0.891603	0.673223	-0.30926	0.891603	0.774696
ADM5	0.0503254	0.961839	0.983392	-0.119239	0.961839	1	-0.169564	0.961839	0.904384
ADNP	-0.210716	6.7646	0.738968	0.0773026	6.7646	1	0.288018	6.7646	0.634653
ADNP2	-0.144012	4.83138	0.869549	0.0584814	4.83138	1	0.202494	4.83138	0.804767
ADNP-AS1	0.215803	2.20336	0.778749	0.149639	2.20336	1	-0.0661641	2.20336	0.965894
ADO	0.337961	7.76934	0.428191	-0.163978	7.76934	1	-0.50194	7.76934	0.227279
ADORA1	0.525131	4.08632	0.0794748	0.0329029	4.08632	1	-0.492228	4.08632	0.243061
ADORA2A	0.0157087	1.846	0.998411	0.277392	1.846	0.903244	0.261683	1.846	0.767521
ADORA2A-AS1	-0.308064	1.00072	0.695994	0.194253	1.00072	1	0.502317	1.00072	0.449394
ADORA2B	0.689855	2.49597	0.0156336	0.142944	2.49597	1	-0.546911	2.49597	0.215393
ADORA3	-0.0111789	3.14962	1	-0.226157	3.14962	0.951725	-0.214978	3.14962	0.806429
ADPGK	0.00957213	4.93485	1	-0.177314	4.93485	0.989253	-0.186886	4.93485	0.829804
ADPGK-AS1	-0.0377102	1.91361	0.988085	-0.00919081	1.91361	1	0.0285194	1.91361	0.99263
ADPRH	0.288125	4.50709	0.562993	-0.413472	4.50709	0.484959	-0.701597	4.50709	0.0293563
ADPRHL1	-0.0608103	-0.427984	0.98659	0.0845929	-0.427984	1	0.145403	-0.427984	0.951033
ADPRHL2	0.200134	4.04651	0.77122	0.0720569	4.04651	1	-0.128077	4.04651	0.907966
ADPRM	-0.104182	2.21329	0.935544	0.217024	2.21329	0.971165	0.321206	2.21329	0.655705
ADRA1A	-0.210194	5.34954	0.746117	-0.907643	5.34954	0.00183555	-0.697449	5.34954	0.0331507
ADRA1B	-0.726246	1.80364	0.0222259	-0.385414	1.80364	0.695627	0.340832	1.80364	0.667963
ADRA1D	0.258128	1.04259	0.754138	-0.250857	1.04259	0.978925	-0.508985	1.04259	0.446379
ADRA2B	-0.188786	1.54565	0.85239	-0.192458	1.54565	1	-0.00367118	1.54565	1
ADRA2C	-0.0371187	1.43715	0.989717	-0.284284	1.43715	0.92645	-0.247166	1.43715	0.811465
ADRB1	-0.204637	1.91566	0.81879	0.44119	1.91566	0.520653	0.645827	1.91566	0.122163
ADRB2	-0.464734	3.92981	0.166348	-0.433543	3.92981	0.453935	0.0311915	3.92981	0.989882
ADRB3	-0.978599	2.9601	8.56741e-05	-0.84593	2.9601	0.0120395	0.132669	2.9601	0.913913
ADRM1	0.137854	5.54199	0.876711	-0.0254665	5.54199	1	-0.16332	5.54199	0.863088
ADSL	0.128394	4.25277	0.894431	-0.0397008	4.25277	1	-0.168094	4.25277	0.860957
ADSS	-0.0425773	4.92012	0.980843	0.0196565	4.92012	1	0.0622338	4.92012	0.963366
ADSSL1	-0.339235	3.51116	0.467536	-0.0175144	3.51116	1	0.32172	3.51116	0.593498
ADTRP	0.173275	3.19255	0.838586	0.208247	3.19255	0.971165	0.0349724	3.19255	0.986359
AEBP1	-0.862574	9.05898	0.000111804	0.220745	9.05898	0.942494	1.08332	9.05898	3.19428e-05
AEBP2	-0.0737209	5.42339	0.954561	0.218844	5.42339	0.936085	0.292565	5.42339	0.628971
AEN	0.173591	3.45304	0.827641	0.132398	3.45304	1	-0.0411923	3.45304	0.981054
AES	-0.0752651	6.55433	0.952878	0.390871	6.55433	0.500031	0.466136	6.55433	0.230159
AFAP1	-0.0853335	6.03154	0.943097	0.0308063	6.03154	1	0.11614	6.03154	0.917465
AFAP1-AS1	-0.263172	3.27635	0.659721	-0.00737976	3.27635	1	0.255793	3.27635	0.73651
AFAP1L1	-0.690098	5.09631	0.00586256	-0.64049	5.09631	0.0629911	0.0496079	5.09631	0.974754
AFAP1L2	-0.263998	4.26816	0.639052	-0.151584	4.26816	1	0.112414	4.26816	0.9236
AFF1	0.0281149	7.66499	0.990758	0.193398	7.66499	0.967106	0.165283	7.66499	0.853453
AFF2	-0.015245	2.75749	0.997957	0.118532	2.75749	1	0.133777	2.75749	0.908743
AFF3	0.611863	4.09689	0.0239858	0.17467	4.09689	0.996711	-0.437193	4.09689	0.33689
AFF4	-0.00998313	7.797	1	0.130927	7.797	1	0.14091	7.797	0.886577
AFG3L1P	-0.198912	3.09101	0.789597	-0.0567394	3.09101	1	0.142172	3.09101	0.897908
AFG3L2	-0.245448	2.49702	0.720385	-0.136117	2.49702	1	0.109331	2.49702	0.936651
AFM	-0.313426	-1.23484	0.869549	-0.826609	-1.23484	0.649308	-0.513182	-1.23484	0.805194
AFMID	-0.425604	1.66386	0.433225	0.776213	1.66386	0.0625244	1.20182	1.66386	0.0005087
AFP	0.210161	-1.07378	0.92473	0.107736	-1.07378	1	-0.102426	-1.07378	0.97568
AFTPH	0.0493293	5.75294	0.976189	0.151689	5.75294	1	0.102359	5.75294	0.931577
AGA	0.415515	4.66411	0.232592	0.129784	4.66411	1	-0.285731	4.66411	0.659359
AGAP1	-0.135021	5.97652	0.880042	0.102973	5.97652	1	0.237994	5.97652	0.739115
AGAP11	-0.188569	3.58302	0.802719	0.140586	3.58302	1	0.329155	3.58302	0.581215
AGAP12P	-0.134563	1.98153	0.906502	0.0512262	1.98153	1	0.185789	1.98153	0.867691
AGAP1-IT1	-0.15024	0.590509	0.916879	-0.0646879	0.590509	1	0.0855525	0.590509	0.965894
AGAP2	-0.196318	1.91076	0.820792	-0.34011	1.91076	0.79331	-0.143792	1.91076	0.913017
AGAP2-AS1	-0.581291	-0.20315	0.376671	-0.444196	-0.20315	0.845425	0.137094	-0.20315	0.953379
AGAP3	-0.154422	5.36483	0.850313	0.10335	5.36483	1	0.257772	5.36483	0.700124
AGAP4	-0.407747	3.70285	0.277305	-0.00825349	3.70285	1	0.399493	3.70285	0.427946
AGAP5	-0.24084	4.33986	0.689498	-0.127407	4.33986	1	0.113434	4.33986	0.922232
AGAP6	-0.361908	2.68554	0.440527	-0.0120417	2.68554	1	0.349866	2.68554	0.57724
AGAP7P	-0.325508	2.45289	0.538049	0.0369796	2.45289	1	0.362488	2.45289	0.563828
AGAP9	-0.379866	3.59496	0.350351	0.00825693	3.59496	1	0.388123	3.59496	0.453878
AGBL1	0.604539	0.462101	0.201568	0.165415	0.462101	1	-0.439124	0.462101	0.610983
AGBL1-AS1	-0.367656	-2.21209	0.926802	-0.0342419	-2.21209	1	0.333414	-2.21209	0.945201
AGBL2	-0.103749	1.04578	0.951154	-0.0798449	1.04578	1	0.0239039	1.04578	0.998395
AGBL3	-0.180325	1.53016	0.865095	0.128956	1.53016	1	0.309282	1.53016	0.729282
AGBL4	0.434985	0.116591	0.569856	0.428395	0.116591	0.83251	-0.00659044	0.116591	1
AGBL4-IT1	-0.0482022	-2.80793	1	0.528918	-2.80793	1	0.57712	-2.80793	0.936114
AGBL5	0.0352026	5.20993	0.986478	-0.0276608	5.20993	1	-0.0628635	5.20993	0.963077
AGBL5-AS1	0.342325	-1.23417	0.852144	-0.0340188	-1.23417	1	-0.376344	-1.23417	0.872169
AGER	-0.0985261	1.65877	0.947338	0.083373	1.65877	1	0.181899	1.65877	0.879126
AGFG1	0.130452	6.64207	0.886902	0.162622	6.64207	0.999185	0.0321695	6.64207	0.987103
AGFG2	0.026972	3.79493	0.992653	-0.184824	3.79493	0.988522	-0.211796	3.79493	0.799743
AGGF1	-0.00266673	6.06972	1	0.00276523	6.06972	1	0.00543196	6.06972	1
AGK	0.0616911	4.58932	0.969189	0.0555662	4.58932	1	-0.00612481	4.58932	1
AGL	-0.278344	6.76874	0.575705	-0.539547	6.76874	0.164556	-0.261203	6.76874	0.697373
AGMAT	-0.101417	1.73416	0.942048	-0.393971	1.73416	0.701119	-0.292553	1.73416	0.744808
AGMO	0.389558	1.99912	0.453464	0.397677	1.99912	0.658755	0.00811872	1.99912	1
AGO1	0.0109469	6.24203	1	0.174409	6.24203	0.989253	0.163462	6.24203	0.859437
AGO2	0.0356224	5.54644	0.986288	0.183729	5.54644	0.978925	0.148106	5.54644	0.878884
AGO3	-0.11843	5.13418	0.904658	-0.128233	5.13418	1	-0.00980273	5.13418	1
AGO4	0.0407016	6.01075	0.982178	0.125545	6.01075	1	0.0848431	6.01075	0.946601
AGPAT1	0.0635082	4.82312	0.966012	-0.0865424	4.82312	1	-0.150051	4.82312	0.879187
AGPAT2	-0.211059	8.77525	0.742698	-1.09398	8.77525	3.67805e-05	-0.882925	8.77525	0.0015659
AGPAT3	0.227748	6.66171	0.703851	-0.220961	6.66171	0.932158	-0.44871	6.66171	0.292997
AGPAT4	-0.0496405	4.3534	0.976774	0.0101773	4.3534	1	0.0598178	4.3534	0.965894
AGPAT4-IT1	-0.14548	0.392797	0.922409	-0.0264873	0.392797	1	0.118993	0.392797	0.95166
AGPAT5	0.195403	4.85042	0.774873	0.00357884	4.85042	1	-0.191824	4.85042	0.822823
AGPS	-0.0424192	6.6994	0.980002	-0.0514063	6.6994	1	-0.00898711	6.6994	1
AGR2	0.128299	-0.784221	0.960329	-0.651751	-0.784221	0.755695	-0.78005	-0.784221	0.476011
AGR3	0.738691	-1.89969	0.664336	0.675493	-1.89969	0.972014	-0.0631986	-1.89969	0.99954
AGRN	-0.378423	5.66324	0.315388	-0.0937207	5.66324	1	0.284702	5.66324	0.652777
AGRP	-0.258265	-0.855143	0.886035	-0.492874	-0.855143	0.900213	-0.234609	-0.855143	0.923712
AGT	-1.0181	1.57087	0.00025792	-0.660929	1.57087	0.147508	0.357172	1.57087	0.661521
AGTPBP1	0.117182	4.80689	0.907363	-0.0929903	4.80689	1	-0.210172	4.80689	0.792695
AGTR1	-0.78012	5.53169	0.00083265	-0.12152	5.53169	1	0.6586	5.53169	0.0317027
AGTR2	-0.279949	1.48551	0.703699	-1.12506	1.48551	0.00288306	-0.845109	1.48551	0.0507505
AGTRAP	0.316515	4.2516	0.498758	0.067099	4.2516	1	-0.249416	4.2516	0.73651
AGXT	-0.186727	-1.17758	0.95143	0.0275442	-1.17758	1	0.214271	-1.17758	0.945274
AGXT2	-0.00628389	0.360877	1	0.242298	0.360877	0.999399	0.248582	0.360877	0.854986
AHCTF1	0.0839808	7.14814	0.944081	0.0282367	7.14814	1	-0.0557441	7.14814	0.967276
AHCTF1P1	0.0772584	7.10263	0.952033	0.023964	7.10263	1	-0.0532944	7.10263	0.969711
AHCY	0.00692378	4.8132	1	-0.201953	4.8132	0.965552	-0.208877	4.8132	0.795847
AHCYL1	0.133421	6.89279	0.881974	0.105224	6.89279	1	-0.0281969	6.89279	0.990994
AHCYL2	0.0527	4.40401	0.974726	0.0734766	4.40401	1	0.0207766	4.40401	0.996953
AHDC1	-0.512109	4.74877	0.0853026	-0.205107	4.74877	0.958455	0.307002	4.74877	0.61208
AHI1	-0.0248466	4.68814	0.993402	-0.150493	4.68814	1	-0.125646	4.68814	0.90861
AHNAK	0.101577	13.5515	0.921559	0.232502	13.5515	0.908012	0.130925	13.5515	0.89644
AHNAK2	-0.28673	9.23989	0.544481	0.37281	9.23989	0.554892	0.659541	9.23989	0.0300837
AHR	0.497441	6.35263	0.0895442	0.349647	6.35263	0.611473	-0.147794	6.35263	0.880771
AHRR	0.0141879	3.02742	0.998411	-0.120969	3.02742	1	-0.135157	3.02742	0.906663
AHSA1	0.316724	5.42664	0.48032	-0.121333	5.42664	1	-0.438057	5.42664	0.311365
AHSA2	-0.0551972	5.86271	0.974193	-0.148721	5.86271	1	-0.0935234	5.86271	0.939727
AHSG	1.04843	-1.60807	0.299228	0.272182	-1.60807	1	-0.776249	-1.60807	0.645867
AHSP	0.200356	-1.34715	0.942525	0.025924	-1.34715	1	-0.174432	-1.34715	0.95593
AICDA	-0.146491	-1.34314	0.964471	-0.775045	-1.34314	0.726872	-0.628554	-1.34314	0.731895
AIDA	0.12381	7.18331	0.895651	0.039502	7.18331	1	-0.0843078	7.18331	0.946332
AIF1	0.565702	3.58901	0.0531406	0.164911	3.58901	1	-0.400791	3.58901	0.447064
AIF1L	0.167774	5.15058	0.826909	-0.026541	5.15058	1	-0.194315	5.15058	0.817682
AIFM1	-0.0364467	4.73065	0.985844	-0.317469	4.73065	0.734294	-0.281022	4.73065	0.668801
AIFM2	0.634082	6.07816	0.0127333	0.249904	6.07816	0.891517	-0.384179	6.07816	0.446877
AIFM3	-0.0961223	1.34087	0.952181	-0.175929	1.34087	1	-0.0798069	1.34087	0.96364
AIG1	0.0105766	5.28057	1	0.266284	5.28057	0.846339	0.255707	5.28057	0.707086
AIM1	0.476773	6.99538	0.112084	0.0461823	6.99538	1	-0.43059	6.99538	0.335804
AIM1L	-0.0694578	1.06492	0.974285	0.481026	1.06492	0.556116	0.550483	1.06492	0.333132
AIM2	0.0792896	3.93705	0.952181	-0.346877	3.93705	0.664116	-0.426166	3.93705	0.381632
AIMP1	-0.0138473	4.61254	0.998136	0.112019	4.61254	1	0.125866	4.61254	0.907841
AIMP2	0.35906	3.57701	0.398274	-0.00704184	3.57701	1	-0.366101	3.57701	0.511786
AIP	-0.0745916	5.17508	0.954076	0.121412	5.17508	1	0.196003	5.17508	0.811988
AIPL1	0.173839	-1.00461	0.94631	-0.014235	-1.00461	1	-0.188074	-1.00461	0.945874
AIRE	-0.0174747	1.90066	0.997674	0.0226237	1.90066	1	0.0400984	1.90066	0.985814
AIRN	0.0981979	1.10804	0.952181	-0.301743	1.10804	0.911329	-0.399941	1.10804	0.607225
AJAP1	0.0488193	1.17533	0.98393	0.351543	1.17533	0.837066	0.302724	1.17533	0.755346
AJUBA	-0.137289	3.01163	0.894091	0.259203	3.01163	0.897122	0.396493	3.01163	0.467151
AK1	0.334668	3.30771	0.483086	-0.453213	3.30771	0.446165	-0.787881	3.30771	0.016446
AK2	0.290592	6.86747	0.541779	-0.14261	6.86747	1	-0.433201	6.86747	0.322324
AK3	0.120528	7.52076	0.900835	-0.0346302	7.52076	1	-0.155158	7.52076	0.872082
AK4	0.18508	7.44734	0.795587	-0.170015	7.44734	0.996711	-0.355095	7.44734	0.501103
AK5	-0.35179	1.60838	0.534109	-0.267153	1.60838	0.934829	0.084637	1.60838	0.960692
AK6	0.158342	3.25495	0.858323	0.169267	3.25495	1	0.0109255	3.25495	1
AK7	0.249313	0.318446	0.822593	0.140805	0.318446	1	-0.108508	0.318446	0.957008
AK8	0.0548192	1.55358	0.978437	0.18127	1.55358	1	0.126451	1.55358	0.930925
AK9	-0.0446899	1.401	0.985839	-0.0542462	1.401	1	-0.00955625	1.401	1
AKAIN1	0.152532	-1.23725	0.957164	-0.724246	-1.23725	0.800484	-0.876778	-1.23725	0.505909
AKAP1	0.401637	6.35505	0.248404	0.248694	6.35505	0.884116	-0.152943	6.35505	0.875519
AKAP10	0.0799197	5.48236	0.950326	0.014216	5.48236	1	-0.0657038	5.48236	0.962096
AKAP11	0.0697851	6.91697	0.957983	0.12069	6.91697	1	0.0509045	6.91697	0.971621
AKAP12	0.348681	9.73586	0.380971	0.076385	9.73586	1	-0.272296	9.73586	0.672796
AKAP13	-0.0570308	8.861	0.972049	0.128542	8.861	1	0.185572	8.861	0.822823
AKAP14	0.111078	-1.66452	0.983392	0.506712	-1.66452	0.978804	0.395634	-1.66452	0.886167
AKAP17A	-0.0222101	5.33949	0.994871	0.00649836	5.33949	1	0.0287085	5.33949	0.990994
AKAP2	0.309458	8.39125	0.488967	-0.0480527	8.39125	1	-0.35751	8.39125	0.487257
AKAP3	-0.00922158	1.41345	1	0.16649	1.41345	1	0.175712	1.41345	0.888837
AKAP4	0.236224	-0.950884	0.913036	-0.0179567	-0.950884	1	-0.254181	-0.950884	0.922133
AKAP5	0.519596	3.78224	0.0935103	0.235771	3.78224	0.92133	-0.283824	3.78224	0.685418
AKAP6	-0.24533	3.74132	0.689993	-0.194064	3.74132	0.978525	0.0512662	3.74132	0.974896
AKAP7	0.207351	3.92749	0.760299	0.136546	3.92749	1	-0.070805	3.92749	0.960692
AKAP8	-0.107944	5.04836	0.915448	-0.0118008	5.04836	1	0.0961435	5.04836	0.938102
AKAP8L	-0.142073	5.13458	0.871812	-0.0425498	5.13458	1	0.0995236	5.13458	0.936101
AKAP9	-0.143787	7.91408	0.864756	0.0828633	7.91408	1	0.22665	7.91408	0.755793
AKIP1	-0.119147	3.51875	0.909674	-0.269021	3.51875	0.874373	-0.149874	3.51875	0.888454
AKIRIN1	0.18713	5.3598	0.789307	-0.201044	5.3598	0.96279	-0.388174	5.3598	0.425811
AKIRIN2	0.248628	4.4855	0.669884	0.171308	4.4855	0.993987	-0.0773199	4.4855	0.954053
AKNA	-0.0921869	4.79747	0.935544	0.110266	4.79747	1	0.202453	4.79747	0.802476
AKNAD1	-0.241432	2.50072	0.735266	0.616767	2.50072	0.129351	0.858198	2.50072	0.00618082
AKR1A1	0.108775	5.3055	0.913734	0.0787498	5.3055	1	-0.030025	5.3055	0.989882
AKR1B1	0.399597	5.07596	0.264976	-0.203546	5.07596	0.959158	-0.603143	5.07596	0.0817093
HBA1	3.08657	10.6617	1.10007e-46	0.874974	10.6617	0.0130229	-2.2116	10.6617	1.7718e-18
HBA2	3.08657	10.6617	1.10007e-46	0.874974	10.6617	0.0130229	-2.2116	10.6617	1.7718e-18
AKR1C1	0.157577	9.93625	0.850306	-0.963785	9.93625	0.00042641	-1.12136	9.93625	1.0865e-05
AKR1C2	0.208576	10.2372	0.751232	-0.931686	10.2372	0.000781	-1.14026	10.2372	7.52696e-06
AKR1C3	0.170056	8.1917	0.825534	-0.948359	8.1917	0.000536561	-1.11841	8.1917	1.14703e-05
AKR1C4	0.394492	6.37616	0.286645	-0.650357	6.37616	0.056922	-1.04485	6.37616	7.28076e-05
AKR1C6P	0.0711503	1.00932	0.974285	-0.377307	1.00932	0.852719	-0.448457	1.00932	0.584442
HBE1	3.07871	8.06173	1.77245e-45	1.22636	8.06173	9.48654e-05	-1.85236	8.06173	5.62531e-13
AKR1D1	0.342798	-1.04516	0.845042	0.965837	-1.04516	0.28837	0.623039	-1.04516	0.591545
AKR1E2	-0.0261533	2.79666	0.993625	-0.258732	2.79666	0.91331	-0.232579	2.79666	0.792726
AKR7A2	0.340527	7.21299	0.416561	0.0236427	7.21299	1	-0.316885	7.21299	0.587192
AKR7A2P1	0.617845	4.4295	0.0230928	0.122148	4.4295	1	-0.495697	4.4295	0.243215
AKR7A3	0.617165	4.43012	0.0233278	0.12119	4.43012	1	-0.495975	4.43012	0.243061
AKR7L	0.330962	5.52141	0.453216	-0.00459698	5.52141	1	-0.335559	5.52141	0.563353
AKT1	-0.033153	6.48212	0.986683	-0.117228	6.48212	1	-0.0840748	6.48212	0.94715
AKT1S1	-0.129842	5.01671	0.889981	-0.181206	5.01671	0.985834	-0.0513633	5.01671	0.97238
AKT2	0.0299519	7.49196	0.989732	-0.197652	7.49196	0.965552	-0.227604	7.49196	0.760451
AKT3	-0.0412285	6.88482	0.981838	0.211845	6.88482	0.945458	0.253074	6.88482	0.704835
AKTIP	0.214741	5.26854	0.738384	0.258136	5.26854	0.868052	0.0433944	5.26854	0.978459
ALAD	0.325221	6.11717	0.463616	-0.313328	6.11717	0.752426	-0.638549	6.11717	0.0625308
ALAS1	0.317019	5.00514	0.487146	0.169622	5.00514	0.995961	-0.147397	5.00514	0.885093
S100A9	3.06468	2.27341	4.12999e-35	0.538383	2.27341	0.515877	-2.5263	2.27341	1.41686e-18
ALB	0.638541	-0.899941	0.441375	-0.170066	-0.899941	1	-0.808607	-0.899941	0.44859
ALCAM	0.608612	6.42019	0.0216445	0.826429	6.42019	0.00398421	0.217817	6.42019	0.767521
ALDH16A1	-0.152558	3.90413	0.861726	0.0399982	3.90413	1	0.192556	3.90413	0.827978
ALDH18A1	-0.276483	5.69907	0.58213	-0.375671	5.69907	0.561526	-0.0991879	5.69907	0.935345
ALDH1A1	-0.226571	7.98325	0.711542	0.282368	7.98325	0.817139	0.508939	7.98325	0.159541
PF4	2.98309	0.624772	4.87608e-22	1.70489	0.624772	0.000119987	-1.27819	0.624772	0.000540002
ALDH1A3	0.318229	6.29638	0.48032	-0.0339556	6.29638	1	-0.352185	6.29638	0.503689
ALDH1B1	-0.541896	5.40076	0.0736572	-1.24743	5.40076	2.17493e-06	-0.705536	5.40076	0.0349243
ALDH1L1	-0.629381	6.52526	0.0163591	-0.349278	6.52526	0.631361	0.280103	6.52526	0.666126
ALDH1L1-AS1	-0.645208	1.31977	0.103957	-0.404568	1.31977	0.736697	0.24064	1.31977	0.846307
ALDH1L1-AS2	-0.158484	1.59791	0.890101	-0.188024	1.59791	1	-0.0295402	1.59791	0.993027
ALDH1L2	-0.031665	5.99038	0.988519	-0.292587	5.99038	0.791549	-0.260922	5.99038	0.701479
ALDH2	-0.200832	8.71381	0.759731	-0.211376	8.71381	0.951725	-0.0105443	8.71381	1
ALDH3A1	0.490505	4.92448	0.126131	1.11025	4.92448	3.79958e-05	0.619744	4.92448	0.0554056
ALDH3A2	0.0900926	6.5579	0.935861	0.0321161	6.5579	1	-0.0579765	6.5579	0.965894
ALDH3B1	0.0975497	3.87787	0.932141	0.148902	3.87787	1	0.0513524	3.87787	0.974451
ALDH3B2	-0.255598	2.26386	0.718857	0.55044	2.26386	0.288181	0.806038	2.26386	0.0211592
ALDH4A1	0.485182	4.51567	0.121938	0.266179	4.51567	0.8669	-0.219003	4.51567	0.781575
ALDH5A1	0.0513587	3.94759	0.976189	0.191151	3.94759	0.978925	0.139792	3.94759	0.895963
ALDH6A1	-0.477856	5.97202	0.119756	-0.118534	5.97202	1	0.359322	5.97202	0.472765
ALDH7A1	-0.287153	4.17339	0.573821	-0.0374935	4.17339	1	0.24966	4.17339	0.734856
ALDH8A1	-0.0547463	1.47964	0.979351	-0.390018	1.47964	0.76329	-0.335272	1.47964	0.704835
ALDH9A1	0.306227	6.87534	0.502185	-0.337474	6.87534	0.656635	-0.643701	6.87534	0.0441117
ALDOA	0.0122623	9.17174	0.998664	-0.594463	9.17174	0.0880948	-0.606726	9.17174	0.0683054
ALDOB	0.0927597	-0.89735	0.978646	0.168314	-0.89735	1	0.0755539	-0.89735	0.983845
ALDOC	0.494405	9.42119	0.0995573	-0.312608	9.42119	0.764421	-0.807013	9.42119	0.00711485
ALG1	-0.110251	3.77145	0.916895	0.0700274	3.77145	1	0.180278	3.77145	0.846164
ALG10	0.0472266	3.5658	0.978437	0.0195554	3.5658	1	-0.0276712	3.5658	0.991998
ALG10B	0.0309275	4.81328	0.989717	0.0740179	4.81328	1	0.0430904	4.81328	0.979352
ALG11	0.209232	4.92718	0.744854	-0.057431	4.92718	1	-0.266663	4.92718	0.693876
ALG12	-0.0757315	4.10167	0.954561	0.0461867	4.10167	1	0.121918	4.10167	0.913589
ALG13	-0.101067	4.02156	0.927337	-0.0532065	4.02156	1	0.047861	4.02156	0.976595
ALG14	0.32266	3.21638	0.51313	-0.157925	3.21638	1	-0.480586	3.21638	0.304551
ALG1L	-0.199025	2.62596	0.802343	0.0723272	2.62596	1	0.271352	2.62596	0.728169
ALG1L2	-0.196807	2.4339	0.81114	0.076158	2.4339	1	0.272965	2.4339	0.731895
ALG1L9P	-0.0874711	2.00264	0.952878	0.18908	2.00264	0.998207	0.276551	2.00264	0.740663
ALG2	0.236792	4.78504	0.693124	-0.0828631	4.78504	1	-0.319655	4.78504	0.589748
ALG3	0.173285	3.70751	0.825534	-0.116081	3.70751	1	-0.289366	3.70751	0.667963
ALG5	0.237713	4.07403	0.699815	-0.001825	4.07403	1	-0.239538	4.07403	0.755549
ALG6	-0.28938	4.31894	0.563043	-0.210685	4.31894	0.955282	0.0786956	4.31894	0.953069
ALG8	-0.0820476	3.45999	0.952141	-0.0536739	3.45999	1	0.0283738	3.45999	0.991873
ALG9	0.655847	5.08144	0.00947985	0.233708	5.08144	0.917027	-0.422139	5.08144	0.364615
ALK	-0.285534	1.90421	0.671641	-0.295905	1.90421	0.886835	-0.0103711	1.90421	1
ALKBH1	0.120589	2.60219	0.912162	0.0681501	2.60219	1	-0.0524388	2.60219	0.975722
ALKBH2	-0.0585158	2.77534	0.974285	0.0958354	2.77534	1	0.154351	2.77534	0.888454
ALKBH3	0.0292097	4.00463	0.990758	0.122295	4.00463	1	0.0930855	4.00463	0.943602
ALKBH3-AS1	-0.122791	1.29553	0.928026	-0.0221481	1.29553	1	0.100643	1.29553	0.95166
ALKBH4	0.14062	3.706	0.88296	0.360987	3.706	0.63211	0.220368	3.706	0.785175
ALKBH5	0.187115	6.44268	0.786002	0.06065	6.44268	1	-0.126465	6.44268	0.903547
ALKBH6	0.269944	2.81034	0.660674	0.0933952	2.81034	1	-0.176549	2.81034	0.865722
ALKBH7	-0.0723188	4.11378	0.957955	0.00304803	4.11378	1	0.0753668	4.11378	0.95593
ALKBH8	0.0672118	3.67166	0.964471	0.146719	3.67166	1	0.0795067	3.67166	0.953379
ALLC	-0.139315	-1.60543	0.974505	0.388918	-1.60543	1	0.528233	-1.60543	0.806838
ALMS1	-0.101215	6.08294	0.922409	0.173999	6.08294	0.990045	0.275214	6.08294	0.663467
ALMS1P1	-0.158475	1.60488	0.887737	0.199582	1.60488	0.994998	0.358057	1.60488	0.624466
ALOX12	-0.305804	3.25953	0.549577	-0.153004	3.25953	1	0.1528	3.25953	0.886815
ALOX12-AS1	-0.196427	2.56673	0.804438	-0.201095	2.56673	0.982658	-0.00466805	2.56673	1
ALOX12B	0.16379	-0.714294	0.938923	0.0127088	-0.714294	1	-0.151081	-0.714294	0.952981
ALOX12P2	-0.599181	-0.0540635	0.360771	0.220741	-0.0540635	1	0.819922	-0.0540635	0.224287
ALOX15	1.22638	1.85562	1.99609e-05	1.84149	1.85562	1.59618e-10	0.615111	1.85562	0.132956
ALOX15B	0.659721	0.569686	0.184607	1.44654	0.569686	0.000112355	0.786821	0.569686	0.0973918
ALOX15P1	0.947399	0.415408	0.0299604	1.68925	0.415408	3.63229e-06	0.741853	0.415408	0.130453
ALOX5	0.418342	3.77707	0.255155	-0.169064	3.77707	1	-0.587407	3.77707	0.113747
ALOX5AP	0.531504	3.77859	0.0775021	0.373712	3.77859	0.596157	-0.157793	3.77859	0.875116
ALOXE3	0.248175	0.259469	0.825023	0.195187	0.259469	1	-0.052988	0.259469	0.985011
ALPI	-0.720485	-0.945842	0.388535	-0.17856	-0.945842	1	0.541925	-0.945842	0.728273
ALPK1	-0.186376	4.98965	0.794836	0.114135	4.98965	1	0.300512	4.98965	0.619564
ALPK2	0.61454	0.705497	0.155766	0.144431	0.705497	1	-0.470109	0.705497	0.537817
ALPK3	-0.171054	3.86113	0.827296	-0.385134	3.86113	0.572304	-0.21408	3.86113	0.795999
ALPL	0.0076126	1.89836	1	-0.186054	1.89836	1	-0.193666	1.89836	0.866277
ALPP	0.0276619	-1.02394	0.998664	0.625102	-1.02394	0.761337	0.59744	-1.02394	0.650645
ALPPL2	-0.133921	-1.09085	0.969701	0.364478	-1.09085	0.993451	0.498399	-1.09085	0.767027
ALS2	-0.157161	5.1373	0.844779	0.0130201	5.1373	1	0.170181	5.1373	0.851526
ALS2CL	-0.11727	3.64582	0.910394	-0.159728	3.64582	1	-0.0424579	3.64582	0.98105
ALS2CR11	0.239212	1.0155	0.789367	-0.176374	1.0155	1	-0.415586	1.0155	0.591657
ALS2CR12	0.690596	1.03529	0.0565792	0.411106	1.03529	0.737159	-0.27949	1.03529	0.778297
ALX1	-0.42271	-0.307958	0.689993	-0.180853	-0.307958	1	0.241857	-0.307958	0.900633
ALX3	-0.757528	-0.228513	0.179297	-0.551492	-0.228513	0.706908	0.206036	-0.228513	0.924237
ALX4	0.128684	1.56761	0.916879	0.114063	1.56761	1	-0.0146214	1.56761	1
ALYREF	0.115355	3.56804	0.911711	-0.0457245	3.56804	1	-0.16108	3.56804	0.875378
AMACR	0.390418	3.35989	0.340564	0.137027	3.35989	1	-0.253391	3.35989	0.740475
AMBN	-0.472726	-1.41128	0.799725	-0.179333	-1.41128	1	0.293393	-1.41128	0.927684
AMBP	-0.0633834	-1.50714	0.992381	-0.488076	-1.50714	0.978525	-0.424692	-1.50714	0.869108
AMBRA1	-0.11167	5.36142	0.910394	0.072863	5.36142	1	0.184533	5.36142	0.831341
AMD1	0.255692	5.87313	0.639468	0.0893801	5.87313	1	-0.166312	5.87313	0.856562
AMDHD1	-0.155818	1.6984	0.892371	-0.565616	1.6984	0.351079	-0.409798	1.6984	0.569136
AMDHD2	-0.244462	4.56414	0.67924	-0.106956	4.56414	1	0.137505	4.56414	0.89644
AMELX	-0.0104197	-0.045376	1	-0.0403328	-0.045376	1	-0.0299131	-0.045376	0.998395
AMELY	0.198739	-1.08043	0.932302	-0.0580043	-1.08043	1	-0.256743	-1.08043	0.92
AMER1	-0.141603	3.65743	0.878475	-0.226399	3.65743	0.942494	-0.0847956	3.65743	0.950465
AMER2	-0.0301978	1.97778	0.992653	0.186229	1.97778	1	0.216426	1.97778	0.832199
AMER3	0.025734	-0.180979	0.997674	0.285023	-0.180979	0.993987	0.259289	-0.180979	0.875378
AMFR	0.116967	6.77854	0.904571	0.120075	6.77854	1	0.00310781	6.77854	1
AMH	-0.0234424	-0.467532	0.998411	-0.159008	-0.467532	1	-0.135566	-0.467532	0.955909
AMHR2	-0.324943	0.69218	0.702726	0.275566	0.69218	0.965552	0.600508	0.69218	0.35767
AMIGO1	0.287353	2.59658	0.630348	0.374496	2.59658	0.653499	0.0871432	2.59658	0.952032
AMIGO2	0.193745	5.92833	0.782023	-0.120299	5.92833	1	-0.314044	5.92833	0.622998
AMIGO3	0.0304772	3.11771	0.990713	-0.00568783	3.11771	1	-0.036165	3.11771	0.985393
AMMECR1	-0.0942142	3.9231	0.935544	0.079664	3.9231	1	0.173878	3.9231	0.851272
AMMECR1L	0.149052	5.04161	0.859444	-0.0319709	5.04161	1	-0.181023	5.04161	0.837216
AMN	-0.250563	0.854105	0.794815	0.0942235	0.854105	1	0.344787	0.854105	0.722145
AMN1	-0.0558887	3.3399	0.974633	0.270157	3.3399	0.868967	0.326046	3.3399	0.599221
AMOT	-0.61257	5.7312	0.0188382	0.070306	5.7312	1	0.682876	5.7312	0.0265374
AMOTL1	0.010417	7.19225	1	-0.0382387	7.19225	1	-0.0486557	7.19225	0.974699
AMOTL2	0.383586	7.07661	0.290427	0.363148	7.07661	0.577884	-0.0204376	7.07661	0.996559
AMPD1	0.173067	-1.28567	0.952018	-1.17375	-1.28567	0.404005	-1.34682	-1.28567	0.200597
AMPD2	-0.421097	4.66202	0.222184	-0.358569	4.66202	0.6235	0.0625282	4.66202	0.963722
AMPD3	0.180562	3.90835	0.812709	0.140383	3.90835	1	-0.0401788	3.90835	0.981634
AMPH	0.273007	1.05837	0.738968	-0.117141	1.05837	1	-0.390148	1.05837	0.631909
AMT	-0.298516	4.59028	0.537541	-0.113467	4.59028	1	0.185049	4.59028	0.834115
AMTN	0.118821	-2.13292	0.98659	0.0902317	-2.13292	1	-0.0285895	-2.13292	1
AMY1A	-0.385206	2.97187	0.382062	0.143509	2.97187	1	0.528715	2.97187	0.227279
AMY1B	-0.391791	2.95934	0.36771	0.159829	2.95934	1	0.55162	2.95934	0.192901
AMY1C	-0.395354	2.96092	0.360696	0.156516	2.96092	1	0.55187	2.96092	0.192578
AMY2A	-0.434247	3.63873	0.237762	0.13765	3.63873	1	0.571897	3.63873	0.140375
AMY2B	-0.457285	3.55217	0.193939	-0.0689287	3.55217	1	0.388356	3.55217	0.474029
AMZ1	0.0647158	1.48106	0.974285	0.292702	1.48106	0.900166	0.227986	1.48106	0.829586
AMZ2	0.163955	4.86496	0.833023	0.180108	4.86496	0.987278	0.0161528	4.86496	0.99968
AMZ2P1	-0.0375749	2.4687	0.98659	-0.0193392	2.4687	1	0.0182357	2.4687	0.999604
ANAPC1	0.122662	5.93779	0.898452	0.0450183	5.93779	1	-0.0776437	5.93779	0.952032
ANAPC10	0.0209677	3.54056	0.995176	0.0589433	3.54056	1	0.0379756	3.54056	0.983951
ANAPC11	0.106486	4.47956	0.918586	-0.0653215	4.47956	1	-0.171807	4.47956	0.855268
ANAPC13	0.0585138	5.2749	0.970995	0.116545	5.2749	1	0.0580307	5.2749	0.966
ANAPC15	0.169729	3.66201	0.832719	-0.13692	3.66201	1	-0.306649	3.66201	0.640808
ANAPC16	-0.011981	5.28439	0.999135	0.0287893	5.28439	1	0.0407703	5.28439	0.980565
ANAPC1P1	0.131842	4.00222	0.892089	0.00627528	4.00222	1	-0.125567	4.00222	0.910386
ANAPC2	-0.0211311	4.66034	0.994871	-0.0467406	4.66034	1	-0.0256095	4.66034	0.991998
ANAPC4	0.000323391	4.94669	1	0.0547418	4.94669	1	0.0544184	4.94669	0.969711
ANAPC5	-0.0822245	5.95334	0.947077	-0.139864	5.95334	1	-0.057639	5.95334	0.966129
ANAPC7	0.00965929	5.43306	1	-0.0638211	5.43306	1	-0.0734804	5.43306	0.95593
ANG	0.00326821	5.41546	1	0.579506	5.41546	0.112184	0.576238	5.41546	0.0849777
ANGEL1	-0.146633	4.87201	0.865209	-0.0205863	4.87201	1	0.126047	4.87201	0.905595
ANGEL2	-0.0517276	5.03082	0.974726	0.0650965	5.03082	1	0.116824	5.03082	0.917757
ANGPT1	0.286683	5.97036	0.565774	-0.00723866	5.97036	1	-0.293922	5.97036	0.646267
ANGPT2	0.229345	5.17266	0.710734	-0.589959	5.17266	0.116477	-0.819304	5.17266	0.00453785
ANGPT4	-0.473918	0.385327	0.498844	0.346377	0.385327	0.888647	0.820295	0.385327	0.118444
ANGPTL1	-0.0656416	6.41463	0.963616	0.200124	6.41463	0.963523	0.265765	6.41463	0.68743
ANGPTL2	-0.545808	7.76602	0.0485976	-0.476737	7.76602	0.284783	0.0690704	7.76602	0.960118
ANGPTL3	-0.0800607	1.84953	0.961165	0.133222	1.84953	1	0.213283	1.84953	0.837216
ANGPTL4	0.884262	5.8901	0.000134088	1.24591	5.8901	9.34067e-07	0.36165	5.8901	0.542066
ANGPTL5	0.718108	5.23723	0.00484304	1.16078	5.23723	8.03623e-06	0.442675	5.23723	0.286444
ANGPTL6	-0.127282	1.78384	0.91538	0.0665083	1.78384	1	0.19379	1.78384	0.866253
ANGPTL7	-0.366826	2.19454	0.494767	0.867044	2.19454	0.00795984	1.23387	2.19454	1.80674e-05
ANGPTL8	-1.84211	4.56518	5.95617e-17	-3.10937	4.56518	7.3551e-32	-1.26726	4.56518	3.61863e-05
ANHX	0.725012	-1.19047	0.468104	0.370271	-1.19047	1	-0.35474	-1.19047	0.872389
ANK1	0.545465	2.69488	0.0895442	0.640452	2.69488	0.100589	0.0949865	2.69488	0.945042
ANK2	0.0779716	8.79331	0.951154	-0.119186	8.79331	1	-0.197157	8.79331	0.806429
ANK3	-0.145605	5.31875	0.868504	0.602347	5.31875	0.0974162	0.747952	5.31875	0.0129485
ANKAR	-0.194075	3.41683	0.796492	-0.077341	3.41683	1	0.116734	3.41683	0.924089
ANKDD1A	-0.0447817	0.631561	0.987478	-0.119665	0.631561	1	-0.0748836	0.631561	0.971779
ANKDD1B	-0.0237491	3.17789	0.994871	-0.00349894	3.17789	1	0.0202502	3.17789	0.997629
ANKEF1	-0.590687	1.15735	0.152091	-0.974982	1.15735	0.0222936	-0.384295	1.15735	0.688234
ANKFN1	0.134759	2.75488	0.898742	0.368036	2.75488	0.66823	0.233277	2.75488	0.77927
ANKFY1	0.141064	6.45479	0.870135	0.0177313	6.45479	1	-0.123333	6.45479	0.907575
ANKH	-0.151922	5.49695	0.85425	0.0909655	5.49695	1	0.242887	5.49695	0.733071
ANKHD1	-0.121095	7.177	0.899181	0.0406547	7.177	1	0.16175	7.177	0.860719
ANKHD1-EIF4EBP3	-0.117253	7.20178	0.903782	0.0475804	7.20178	1	0.164834	7.20178	0.856562
ANKIB1	0.0753945	6.39339	0.952497	-0.0516911	6.39339	1	-0.127086	6.39339	0.9025
ANKK1	0.146477	0.889806	0.910394	-0.0788675	0.889806	1	-0.225344	0.889806	0.86068
ANKLE1	-0.0540538	-0.441418	0.98869	-0.473059	-0.441418	0.86267	-0.419005	-0.441418	0.764843
ANKLE2	0.166716	6.17777	0.826017	-0.2131	6.17777	0.946232	-0.379816	6.17777	0.447401
ANKMY1	-0.0816744	2.06114	0.956916	-0.0887516	2.06114	1	-0.00707719	2.06114	1
ANKMY2	0.211661	5.16675	0.740985	0.370261	5.16675	0.56872	0.1586	5.16675	0.871338
ANKRA2	0.0264439	3.05218	0.993402	0.262006	3.05218	0.891083	0.235562	3.05218	0.769507
ANKRD1	-1.1759	-0.884349	0.04342	-0.711474	-0.884349	0.637124	0.464424	-0.884349	0.811465
ANKRD10	-0.136652	6.16995	0.877334	-0.261162	6.16995	0.856366	-0.12451	6.16995	0.906954
ANKRD11	-0.1565	6.26875	0.843309	0.145163	6.26875	1	0.301663	6.26875	0.608638
ANKRD13A	0.233589	6.13908	0.690951	0.0368313	6.13908	1	-0.196758	6.13908	0.810864
ANKRD13B	-0.513884	3.503	0.104329	-0.310029	3.503	0.784768	0.203855	3.503	0.821613
ANKRD13C	0.0177824	5.76981	0.997265	-0.0538648	5.76981	1	-0.0716472	5.76981	0.957008
ANKRD13D	-0.00210591	3.87306	1	0.0149919	3.87306	1	0.0170978	3.87306	0.9994
ANKRD16	-0.204356	2.93614	0.783507	-0.0584979	2.93614	1	0.145859	2.93614	0.897766
ANKRD17	-0.0711689	6.43008	0.956593	-0.0918461	6.43008	1	-0.0206772	6.43008	0.996297
ANKRD18A	-0.185738	4.18339	0.802881	-0.383612	4.18339	0.576315	-0.197874	4.18339	0.825266
ANKRD18B	-0.185233	4.18256	0.80338	-0.383236	4.18256	0.577518	-0.198003	4.18256	0.825266
ANKRD18CP	-0.200434	4.06579	0.773841	-0.429086	4.06579	0.460132	-0.228652	4.06579	0.776742
ANKRD18DP	-0.378054	1.79546	0.519665	-0.444058	1.79546	0.611025	-0.0660043	1.79546	0.971779
ANKRD19P	-0.318333	6.85101	0.466019	-0.0871464	6.85101	1	0.231187	6.85101	0.748127
ANKRD2	-0.204064	0.436278	0.868504	-0.467058	0.436278	0.702777	-0.262994	0.436278	0.847151
ANKRD20A1	-0.480519	-1.61446	0.804352	-1.04369	-1.61446	0.658498	-0.563166	-1.61446	0.851143
ANKRD20A11P	-0.70625	-1.67439	0.623641	-0.357069	-1.67439	1	0.349181	-1.67439	0.918855
ANKRD20A12P	-0.298446	2.57958	0.609885	-0.376622	2.57958	0.66851	-0.0781763	2.57958	0.960706
ANKRD20A2	-0.480519	-1.61446	0.804352	-1.04369	-1.61446	0.658498	-0.563166	-1.61446	0.851143
ANKRD20A3	-0.298652	-1.47904	0.903315	-1.2662	-1.47904	0.42165	-0.967551	-1.47904	0.603149
ANKRD20A4	-0.480519	-1.61446	0.804352	-1.04369	-1.61446	0.658498	-0.563166	-1.61446	0.851143
ANKRD20A5P	-0.402482	-1.60189	0.854908	-1.06894	-1.60189	0.636175	-0.666459	-1.60189	0.799374
ANKRD20A8P	-0.42035	-1.63669	0.855282	-0.240999	-1.63669	1	0.179351	-1.63669	0.965549
ANKRD20A9P	0.00801033	0.740695	1	-0.433407	0.740695	0.761903	-0.441417	0.740695	0.606902
ANKRD22	0.393595	0.546323	0.570726	0.430754	0.546323	0.755695	0.0371591	0.546323	0.991873
ANKRD23	-0.392785	3.14394	0.341193	0.0747579	3.14394	1	0.467543	3.14394	0.310028
ANKRD24	-0.0189818	1.81157	0.997674	0.205079	1.81157	0.992362	0.22406	1.81157	0.825266
ANKRD26	-0.272522	4.76881	0.602789	-0.303553	4.76881	0.769691	-0.0310307	4.76881	0.989581
ANKRD26P1	-0.139995	3.72825	0.885884	0.219419	3.72825	0.951725	0.359414	3.72825	0.518175
ANKRD26P3	-0.264806	3.46378	0.656836	-0.250272	3.46378	0.906834	0.014534	3.46378	0.999783
ANKRD27	0.027995	5.63629	0.990854	0.140982	5.63629	1	0.112987	5.63629	0.92
ANKRD28	0.0563089	6.44343	0.973374	0.11423	6.44343	1	0.0579206	6.44343	0.965894
ANKRD29	0.305293	3.53948	0.542331	0.16161	3.53948	1	-0.143683	3.53948	0.895269
ANKRD30A	-0.000717851	-0.816445	1	-0.289253	-0.816445	1	-0.288535	-0.816445	0.889557
ANKRD30B	-0.0299044	-0.550479	0.997569	-0.383558	-0.550479	0.961031	-0.353653	-0.550479	0.83161
ANKRD30BL	0.215616	0.0210256	0.875831	0.456769	0.0210256	0.765763	0.241154	0.0210256	0.869108
ANKRD30BP2	0.550775	-1.81527	0.793316	-0.280944	-1.81527	1	-0.831719	-1.81527	0.684012
ANKRD30BP3	0.652044	-1.99814	0.791414	-0.522969	-1.99814	1	-1.17501	-1.99814	0.633485
ANKRD31	-0.219378	1.32188	0.816804	0.230486	1.32188	0.981704	0.449864	1.32188	0.507454
ANKRD33	0.139971	-0.650723	0.95609	0.591454	-0.650723	0.734737	0.451483	-0.650723	0.748116
ANKRD33B	-0.879041	5.20551	0.000101969	0.0130056	5.20551	1	0.892047	5.20551	0.00105863
ANKRD34A	0.366083	1.68202	0.5061	0.229942	1.68202	0.974376	-0.136141	1.68202	0.922434
ANKRD34B	-0.302925	-0.177729	0.795642	0.216945	-0.177729	1	0.51987	-0.177729	0.594578
ANKRD34C	0.107262	-0.495391	0.968684	-0.55244	-0.495391	0.82023	-0.659703	-0.495391	0.549051
ANKRD34C-AS1	0.45409	-1.65447	0.834601	1.16995	-1.65447	0.366377	0.715862	-1.65447	0.668842
ANKRD35	-0.299832	1.7904	0.651169	0.0366895	1.7904	1	0.336521	1.7904	0.662495
ANKRD36	0.0816133	1.80992	0.963213	0.126925	1.80992	1	0.0453118	1.80992	0.984066
ANKRD36B	0.0506474	1.53137	0.98298	0.0781522	1.53137	1	0.0275048	1.53137	0.996399
ANKRD36BP1	-0.128894	3.96989	0.896269	0.284128	3.96989	0.819988	0.413022	3.96989	0.386868
ANKRD36BP2	-0.353922	0.184466	0.718857	-0.27063	0.184466	0.992567	0.0832917	0.184466	0.974054
ANKRD36C	0.0855621	2.31828	0.952882	0.00269594	2.31828	1	-0.0828662	2.31828	0.957008
ANKRD37	-0.017868	1.38385	0.997674	-0.0743415	1.38385	1	-0.0564735	1.38385	0.977954
ANKRD39	-0.146222	2.84561	0.880179	0.0179613	2.84561	1	0.164183	2.84561	0.877799
ANKRD40	0.22912	6.3214	0.703851	0.149164	6.3214	1	-0.0799563	6.3214	0.951162
ANKRD42	-0.0700961	4.24209	0.961102	-0.104253	4.24209	1	-0.0341572	4.24209	0.986472
ANKRD44	0.165071	5.05539	0.830677	-0.141353	5.05539	1	-0.306424	5.05539	0.613859
ANKRD44-IT1	-0.00354526	0.492396	1	-0.25403	0.492396	0.993987	-0.250484	0.492396	0.856786
ANKRD45	-0.251516	-1.30868	0.916743	-0.414829	-1.30868	0.99458	-0.163312	-1.30868	0.962963
ANKRD46	0.0148902	4.72727	0.997674	0.132514	4.72727	1	0.117624	4.72727	0.918205
ANKRD49	-0.0529389	2.92055	0.976737	0.133662	2.92055	1	0.186601	2.92055	0.847151
ANKRD50	-0.219304	6.0921	0.723445	-0.0461685	6.0921	1	0.173135	6.0921	0.846187
ANKRD52	0.332421	5.66259	0.434829	0.034492	5.66259	1	-0.297929	5.66259	0.626969
ANKRD53	-0.187651	0.364534	0.88924	-0.0302523	0.364534	1	0.157399	0.364534	0.928969
ANKRD54	0.123544	3.43805	0.904448	-0.0166338	3.43805	1	-0.140178	3.43805	0.898312
ANKRD55	-0.555414	-0.825908	0.591614	-0.0476526	-0.825908	1	0.507761	-0.825908	0.735054
ANKRD6	-0.479125	3.34857	0.158841	0.0318743	3.34857	1	0.510999	3.34857	0.235984
ANKRD60	0.117755	0.350713	0.950076	0.0999668	0.350713	1	-0.0177878	0.350713	1
ANKRD61	-0.100665	0.748404	0.954561	-0.119328	0.748404	1	-0.0186638	0.748404	0.999837
ANKRD62	-0.148858	3.71534	0.869179	-0.315845	3.71534	0.764165	-0.166987	3.71534	0.869108
ANKRD62P1-PARP4P3	0.127153	3.64872	0.899181	-0.0340765	3.64872	1	-0.16123	3.64872	0.873491
ANKRD63	0.439362	0.352541	0.496812	-0.156541	0.352541	1	-0.595903	0.352541	0.385096
ANKRD65	0.169638	0.526618	0.903315	0.293943	0.526618	0.958455	0.124306	0.526618	0.945378
ANKRD66	0.9842	-1.77316	0.404048	-0.594852	-1.77316	1	-1.57905	-1.77316	0.261812
ANKRD7	0.40386	-1.69254	0.843358	-0.414057	-1.69254	1	-0.817917	-1.69254	0.655705
ANKRD9	0.286488	2.63875	0.623303	0.0866758	2.63875	1	-0.199812	2.63875	0.834115
ANKS1A	0.237416	5.67706	0.684647	0.11104	5.67706	1	-0.126375	5.67706	0.905595
ANKS1B	-0.125627	4.26299	0.899616	0.353422	4.26299	0.639995	0.479049	4.26299	0.23306
ANKS3	-0.201838	3.1793	0.781676	-0.12106	3.1793	1	0.0807784	3.1793	0.954053
ANKS4B	-0.711682	-1.3982	0.580271	-0.447262	-1.3982	0.985599	0.264419	-1.3982	0.936789
ANKS6	-0.189827	4.71089	0.786984	-0.0350468	4.71089	1	0.15478	4.71089	0.875148
ANKUB1	0.258127	-1.17732	0.90659	0.163705	-1.17732	1	-0.0944224	-1.17732	0.98105
ANKZF1	-0.232897	5.72156	0.695994	0.00622456	5.72156	1	0.239121	5.72156	0.737886
OXTR	2.92894	4.88442	2.65516e-44	1.66589	4.88442	2.95794e-11	-1.26306	4.88442	5.03233e-06
ANO1	0.237475	3.34727	0.718857	-0.293316	3.34727	0.833823	-0.530791	3.34727	0.201779
ANO10	0.0956691	5.11866	0.93105	-0.205829	5.11866	0.958455	-0.301498	5.11866	0.625893
ANO1-AS2	-0.0577951	-1.32989	0.992653	-1.03464	-1.32989	0.433288	-0.976848	-1.32989	0.423798
ANO2	0.474277	3.01669	0.199746	0.593958	3.01669	0.15963	0.119681	3.01669	0.922434
ANO3	1.53002	5.41803	7.37065e-14	1.49341	5.41803	1.00309e-07	-0.0366186	5.41803	0.988158
ANO4	0.604495	3.32038	0.0396359	0.561991	3.32038	0.185567	-0.0425036	3.32038	0.981054
ANO5	-0.20365	0.939359	0.852503	0.267168	0.939359	0.955987	0.470818	0.939359	0.492789
ANO6	0.133204	8.34763	0.880914	0.138514	8.34763	1	0.00531017	8.34763	1
ANO7	0.0410879	1.29514	0.987688	0.235807	1.29514	0.977481	0.19472	1.29514	0.875519
ANO8	0.0170438	4.39455	0.997569	-0.00496783	4.39455	1	-0.0220116	4.39455	0.995719
ANO9	0.120274	0.259637	0.949904	0.386981	0.259637	0.852719	0.266707	0.259637	0.833719
ANOS1	-0.969925	3.42935	4.67145e-05	-0.259995	3.42935	0.888575	0.709929	3.42935	0.0305719
ANP32A	-0.000732109	5.45542	1	0.120479	5.45542	1	0.121211	5.45542	0.911136
ANP32A-IT1	-0.126643	2.68676	0.90743	-0.289544	2.68676	0.8587	-0.162901	2.68676	0.882078
ANP32AP1	-0.00436759	4.4472	1	0.0997343	4.4472	1	0.104102	4.4472	0.932861
ANP32B	0.0527462	4.99748	0.974633	0.0648504	4.99748	1	0.0121042	4.99748	1
ANP32C	-0.00143137	4.53806	1	0.102124	4.53806	1	0.103556	4.53806	0.932997
ANP32D	0.00726689	3.9653	1	0.0964442	3.9653	1	0.0891773	3.9653	0.945963
ANP32E	0.126681	4.97815	0.894393	0.0837482	4.97815	1	-0.0429327	4.97815	0.979302
ANPEP	-0.634238	5.39063	0.0147727	0.0422364	5.39063	1	0.676474	5.39063	0.0444791
ANTXR1	-0.367138	7.88478	0.334389	0.138836	7.88478	1	0.505974	7.88478	0.16029
ANTXR2	-0.0623037	7.48198	0.965977	-0.00997686	7.48198	1	0.0523268	7.48198	0.970039
ANTXRL	-0.179196	-0.555824	0.932141	0.220894	-0.555824	1	0.40009	-0.555824	0.78208
ANTXRLP1	-0.00218719	-0.0556114	1	0.121967	-0.0556114	1	0.124155	-0.0556114	0.952099
GYPE	2.87442	2.12346	3.95128e-32	1.0008	2.12346	0.0203083	-1.87362	2.12346	2.06128e-10
ANXA10	0.538168	-0.259992	0.495034	-0.960673	-0.259992	0.291788	-1.49884	-0.259992	0.00698749
ANXA11	0.164823	7.44602	0.826017	0.0995243	7.44602	1	-0.0652989	7.44602	0.962081
ANXA13	-0.111416	-1.28687	0.977348	0.0136491	-1.28687	1	0.125065	-1.28687	0.970473
ANXA2	0.421279	10.2283	0.203387	-0.0326788	10.2283	1	-0.453958	10.2283	0.263702
ANXA2P1	0.421943	10.2946	0.201923	-0.0360326	10.2946	1	-0.457975	10.2946	0.256299
ANXA2P2	0.416343	10.0706	0.213286	-0.0316784	10.0706	1	-0.448021	10.0706	0.276062
ANXA2P3	0.422515	10.2529	0.201411	-0.0312961	10.2529	1	-0.453812	10.2529	0.263967
ANXA2R	-0.295948	1.3449	0.694491	-0.0787103	1.3449	1	0.217237	1.3449	0.857923
ANXA3	0.217964	4.51726	0.738918	-0.0279828	4.51726	1	-0.245947	4.51726	0.741139
ANXA4	0.236217	6.20768	0.686694	0.253949	6.20768	0.872062	0.0177315	6.20768	0.998395
ANXA5	-0.0725382	9.70625	0.954944	-0.278531	9.70625	0.816902	-0.205993	9.70625	0.789304
ANXA6	-0.0442742	8.23467	0.978861	0.0044965	8.23467	1	0.0487707	8.23467	0.974451
ANXA7	0.196462	7.44868	0.762634	0.16272	7.44868	0.998862	-0.0337422	7.44868	0.985393
ANXA8	0.531691	1.24119	0.232745	0.610948	1.24119	0.335905	0.0792567	1.24119	0.963722
ANXA8L1	0.530751	1.24628	0.233807	0.606356	1.24628	0.344159	0.0756052	1.24628	0.965894
ANXA9	-0.26494	0.186157	0.824389	0.587462	0.186157	0.494504	0.852402	0.186157	0.115187
AOAH	0.640451	1.81227	0.0485976	0.0565755	1.81227	1	-0.583875	1.81227	0.217151
AOAH-IT1	0.793953	-1.81612	0.578356	-0.632541	-1.81612	0.985365	-1.42649	-1.81612	0.306751
AOC1	-0.323562	-0.52591	0.797673	-0.321154	-0.52591	0.991964	0.00240762	-0.52591	1
CRYAB	2.83826	7.84264	4.96441e-45	1.7418	7.84264	1.24339e-11	-1.09647	7.84264	0.00013287
AOC3	0.261111	7.97958	0.630695	-0.166144	7.97958	0.999399	-0.427255	7.97958	0.360645
AOC4P	0.236	3.72518	0.716754	-0.251622	3.72518	0.912643	-0.487621	3.72518	0.292554
AOX1	-0.957177	9.21371	1.44124e-05	-0.323567	9.21371	0.69433	0.633609	9.21371	0.0423981
AOX3P-AOX2P	-0.258616	4.6574	0.657673	-0.669868	4.6574	0.0574384	-0.411252	4.6574	0.3961
AP1AR	-0.0223986	2.87383	0.994871	0.141268	2.87383	1	0.163667	2.87383	0.876111
AP1B1	0.0902199	6.18827	0.935861	-0.211945	6.18827	0.946232	-0.302165	6.18827	0.613859
AP1B1P1	0.0701167	3.00579	0.963213	-0.167978	3.00579	1	-0.238094	3.00579	0.774316
AP1G1	0.183095	6.52835	0.794836	0.0866049	6.52835	1	-0.0964902	6.52835	0.936777
AP1G2	0.00649769	4.20909	1	0.288741	4.20909	0.810303	0.282243	4.20909	0.665759
AP1M1	0.0963764	5.54963	0.928782	-0.0272837	5.54963	1	-0.12366	5.54963	0.907966
AP1M2	1.4704	0.330895	8.12255e-05	2.36934	0.330895	9.80597e-11	0.898944	0.330895	0.060228
AP1S1	0.0841107	3.96751	0.947792	-0.0619613	3.96751	1	-0.146072	3.96751	0.888622
AP1S2	0.254232	5.09895	0.65083	0.156628	5.09895	1	-0.0976044	5.09895	0.937432
AP1S3	0.43125	0.882418	0.485153	0.545542	0.882418	0.475754	0.114292	0.882418	0.94686
AP2A1	-0.0856568	5.95469	0.94255	0.00433655	5.95469	1	0.0899934	5.95469	0.942291
AP2A2	0.205495	6.45562	0.74602	0.0691959	6.45562	1	-0.1363	6.45562	0.892355
AP2B1	0.0267646	7.32879	0.991743	0.0402429	7.32879	1	0.0134783	7.32879	0.999783
AP2M1	0.160658	6.95394	0.833725	-0.0590367	6.95394	1	-0.219694	6.95394	0.769313
AP2S1	0.224576	5.10031	0.718441	-0.258608	5.10031	0.871372	-0.483184	5.10031	0.239415
AP3B1	-0.0184547	6.4565	0.996912	-0.155158	6.4565	1	-0.136703	6.4565	0.892419
AP3B2	0.0230882	2.73126	0.994871	-0.157235	2.73126	1	-0.180324	2.73126	0.867489
AP3D1	0.0530386	6.28754	0.974285	0.0127714	6.28754	1	-0.0402672	6.28754	0.980757
AP3M1	0.222377	6.19307	0.716599	-0.0635695	6.19307	1	-0.285946	6.19307	0.645057
AP3M2	0.0197452	5.15374	0.995412	-0.151701	5.15374	1	-0.171446	5.15374	0.853807
AP3S1	-0.0127864	5.3487	0.998664	-0.194699	5.3487	0.970271	-0.181912	5.3487	0.834401
AP3S2	0.226213	5.49157	0.711752	-0.100748	5.49157	1	-0.326962	5.49157	0.561847
AP4B1	-0.106814	3.49313	0.922409	0.133468	3.49313	1	0.240283	3.49313	0.760391
AP4B1-AS1	-0.203741	2.23298	0.803148	0.0175325	2.23298	1	0.221273	2.23298	0.818047
AP4E1	0.120273	4.84259	0.903315	-0.162209	4.84259	1	-0.282482	4.84259	0.665044
AP4M1	-0.102891	3.60228	0.926802	0.112551	3.60228	1	0.215442	3.60228	0.792726
AP4S1	-0.0111482	2.84124	1	-0.106684	2.84124	1	-0.0955362	2.84124	0.94528
AP5B1	0.0276608	4.57299	0.991743	-0.116767	4.57299	1	-0.144428	4.57299	0.888454
AP5M1	0.0770853	5.26581	0.952181	-0.00968977	5.26581	1	-0.0867751	5.26581	0.945867
AP5S1	0.0431179	3.56036	0.982134	-0.0955036	3.56036	1	-0.138621	3.56036	0.900149
AP5Z1	-0.196538	4.54521	0.774873	0.00895899	4.54521	1	0.205497	4.54521	0.800849
APAF1	0.0267231	5.64497	0.991901	-0.12415	5.64497	1	-0.150873	5.64497	0.875519
APBA1	-0.165554	4.01419	0.838586	0.122234	4.01419	1	0.287787	4.01419	0.650997
APBA2	-0.326184	0.182329	0.740985	0.272016	0.182329	0.978925	0.5982	0.182329	0.412724
APBA3	0.0172997	3.88105	0.997569	-0.137596	3.88105	1	-0.154895	3.88105	0.878607
APBB1	-0.0316452	4.27793	0.989175	0.306772	4.27793	0.762872	0.338417	4.27793	0.537817
APBB1IP	0.0458499	5.96208	0.978303	0.0298813	5.96208	1	-0.0159686	5.96208	0.999604
APBB2	-0.109906	6.94836	0.911642	-0.0656204	6.94836	1	0.0442853	6.94836	0.977329
APBB3	-0.188999	3.06143	0.810288	0.0201137	3.06143	1	0.209112	3.06143	0.815243
APC	0.0282783	6.71511	0.990713	0.113615	6.71511	1	0.0853366	6.71511	0.945657
APC2	-0.143233	3.29718	0.880179	0.0830489	3.29718	1	0.226282	3.29718	0.781575
APCDD1L	-1.1164	2.16359	6.58125e-06	-0.382641	2.16359	0.658498	0.733755	2.16359	0.052599
APCDD1L-AS1	-1.15981	1.38839	2.81149e-05	-0.207268	1.38839	0.992742	0.952543	1.38839	0.0109181
APCS	-0.922534	-2.27236	0.690951	-0.323354	-2.27236	1	0.59918	-2.27236	0.886815
APEH	-0.0148311	5.45783	0.997674	-0.0573435	5.45783	1	-0.0425125	5.45783	0.979586
APELA	0.0430927	-1.06736	0.995176	0.54786	-1.06736	0.8669	0.504767	-1.06736	0.748138
APEX1	-0.0458975	5.68086	0.978335	-0.0643211	5.68086	1	-0.0184235	5.68086	0.998264
APEX2	0.223637	4.07856	0.734614	0.121011	4.07856	1	-0.102626	4.07856	0.935811
APH1A	-0.122277	5.92106	0.898742	0.00625867	5.92106	1	0.128536	5.92106	0.901048
APH1B	0.135737	5.65733	0.879985	0.0503626	5.65733	1	-0.0853746	5.65733	0.946345
API5	-0.011539	5.54921	0.999548	0.0512873	5.54921	1	0.0628262	5.54921	0.962888
APIP	0.253957	4.64599	0.657673	-0.0634405	4.64599	1	-0.317397	4.64599	0.594646
APITD1	0.11893	1.46226	0.928002	-0.0404658	1.46226	1	-0.159396	1.46226	0.902435
APITD1-CORT	0.128544	1.49614	0.916743	-0.123523	1.49614	1	-0.252067	1.49614	0.798175
APLF	-0.184123	3.92893	0.806897	0.0642807	3.92893	1	0.248404	3.92893	0.73651
APLN	0.357768	2.03468	0.505339	-0.306513	2.03468	0.88705	-0.664281	2.03468	0.136875
APLNR	-0.577224	4.07916	0.0432846	-1.28382	4.07916	1.19162e-06	-0.706595	4.07916	0.0352825
APLP1	-0.0169665	0.695913	0.998664	-0.383525	0.695913	0.846106	-0.366558	0.695913	0.714487
APLP2	0.26043	8.38404	0.618961	0.248595	8.38404	0.879312	-0.0118353	8.38404	1
APMAP	0.365097	7.78354	0.341474	-0.148439	7.78354	1	-0.513536	7.78354	0.184903
APOA1	-0.0177267	-0.594406	1	-0.686726	-0.594406	0.626133	-0.669	-0.594406	0.524541
APOA1-AS	-0.1714	-0.618908	0.935629	0.365832	-0.618908	0.95633	0.537232	-0.618908	0.640903
APOA2	0.505409	-1.66452	0.771377	-0.205875	-1.66452	1	-0.711284	-1.66452	0.693762
APOA4	0.0348837	-0.266728	0.994871	0.296485	-0.266728	0.989253	0.261602	-0.266728	0.874483
APOA5	0.572445	3.02686	0.0831377	0.586546	3.02686	0.186409	0.0141013	3.02686	0.999837
APOB	0.396933	1.65517	0.444744	0.470957	1.65517	0.520152	0.0740242	1.65517	0.963366
APOBEC1	-0.344839	-1.32799	0.860238	-0.223537	-1.32799	1	0.121303	-1.32799	0.972891
APOBEC2	-0.0962594	0.544299	0.962854	0.0213773	0.544299	1	0.117637	0.544299	0.950465
APOBEC3A	1.17994	0.417428	0.000361328	0.462722	0.417428	0.777534	-0.71722	0.417428	0.21845
GYPA	2.80087	3.1844	5.76114e-35	1.10703	3.1844	0.00163932	-1.69384	3.1844	1.44423e-09
APOBEC3B	1.08491	1.00283	0.000263952	0.263016	1.00283	0.978804	-0.821897	1.00283	0.066193
APOBEC3B-AS1	1.23221	0.604044	8.71648e-05	0.635785	0.604044	0.416723	-0.596423	0.604044	0.342537
APOBEC3C	0.267782	2.42045	0.67842	0.093312	2.42045	1	-0.17447	2.42045	0.870895
APOBEC3D	0.139952	0.595107	0.922409	-0.433556	0.595107	0.78844	-0.573507	0.595107	0.42619
APOBEC3F	0.234002	1.99604	0.753592	0.229106	1.99604	0.965397	-0.0048957	1.99604	1
APOBEC3G	0.555868	1.77544	0.119756	0.0830319	1.77544	1	-0.472837	1.77544	0.41603
APOBEC3H	0.587911	0.323506	0.249383	0.278399	0.323506	0.984131	-0.309512	0.323506	0.79239
APOBEC4	-0.279173	-0.628605	0.85933	-0.201149	-0.628605	1	0.0780248	-0.628605	0.98105
APOBR	0.424169	2.26628	0.307462	-0.0963192	2.26628	1	-0.520488	2.26628	0.264893
APOC1	-0.910758	9.34622	5.94188e-05	-0.401997	9.34622	0.473263	0.508761	9.34622	0.189112
APOC1P1	-0.911496	9.35153	5.85416e-05	-0.401759	9.35153	0.473577	0.509737	9.35153	0.187698
APOC2	0.216875	1.31234	0.815741	0.600641	1.31234	0.258462	0.383766	1.31234	0.590891
APOC3	-0.252112	-2.20555	0.957955	-1.09856	-2.20555	0.830393	-0.846448	-2.20555	0.808888
APOC4	-0.154334	-0.461161	0.938833	-0.741733	-0.461161	0.609678	-0.587399	-0.461161	0.676319
APOC4-APOC2	0.136669	1.76757	0.907203	0.302682	1.76757	0.868052	0.166014	1.76757	0.888626
APOD	-0.496606	6.8627	0.0928385	0.897405	6.8627	0.000622445	1.39401	6.8627	3.20808e-09
APOE	-0.321524	10.776	0.462885	-0.0619219	10.776	1	0.259602	10.776	0.698579
APOF	0.297793	-1.63005	0.904814	0.368471	-1.63005	1	0.0706782	-1.63005	0.991848
APOH	0.791009	-1.51089	0.523002	-0.24734	-1.51089	1	-1.03835	-1.51089	0.546632
APOL1	-0.247611	1.47836	0.756341	0.409146	1.47836	0.634925	0.656757	1.47836	0.141458
APOL2	0.525513	5.04024	0.0707854	-0.131541	5.04024	1	-0.657054	5.04024	0.0475132
APOL3	-0.00399658	3.4514	1	0.139843	3.4514	1	0.14384	3.4514	0.895454
APOL4	0.0384644	3.58478	0.985706	0.183892	3.58478	0.98801	0.145427	3.58478	0.890606
APOL5	-0.216767	2.42743	0.773841	-0.0563536	2.42743	1	0.160413	2.42743	0.887177
APOLD1	0.00941759	5.48138	1	-0.0924812	5.48138	1	-0.101899	5.48138	0.935694
APOM	-0.289444	2.29897	0.636917	-0.309567	2.29897	0.833742	-0.0201233	2.29897	0.998732
APOO	0.067165	2.47285	0.969273	-0.471152	2.47285	0.441365	-0.538317	2.47285	0.247382
APOOL	-0.104585	3.88579	0.923319	-0.0551732	3.88579	1	0.0494122	3.88579	0.975722
APOOP5	-0.527807	-0.607623	0.58668	-0.935494	-0.607623	0.360111	-0.407687	-0.607623	0.836321
APOPT1	0.151122	4.2641	0.861554	0.0495829	4.2641	1	-0.101539	4.2641	0.935746
APP	-0.0418089	9.65496	0.980831	-0.148012	9.65496	1	-0.106203	9.65496	0.92635
APPBP2	-0.157733	6.74779	0.840996	-0.136321	6.74779	1	0.0214119	6.74779	0.995619
APPL1	0.0980623	7.14729	0.925913	0.171573	7.14729	0.990908	0.0735104	7.14729	0.95465
APPL2	-0.280167	5.37227	0.574409	0.0487032	5.37227	1	0.32887	5.37227	0.554924
APRT	-0.0144678	4.53603	0.997691	-0.511204	4.53603	0.244831	-0.496736	4.53603	0.225092
APTR	0.1211	2.51677	0.913036	0.332146	2.51677	0.76329	0.211046	2.51677	0.822586
APTX	0.273368	4.39924	0.604445	0.188466	4.39924	0.978925	-0.0849025	4.39924	0.948418
AQP1	-0.204704	7.5406	0.748617	-0.738136	7.5406	0.01679	-0.533432	7.5406	0.140631
AQP10	-0.350022	-1.0945	0.825534	-0.558973	-1.0945	0.867424	-0.208951	-1.0945	0.941763
AQP11	0.0730512	1.65561	0.969273	0.156975	1.65561	1	0.0839243	1.65561	0.960425
AQP12A	0.192163	0.112581	0.90009	0.61496	0.112581	0.463225	0.422797	0.112581	0.668681
AQP12B	0.19341	0.117401	0.899164	0.634347	0.117401	0.42747	0.440938	0.117401	0.644455
AQP2	-0.527034	0.484999	0.348244	-0.595397	0.484999	0.503966	-0.0683634	0.484999	0.979302
HBBP1	2.74989	-1.21471	3.30695e-07	-0.281922	-1.21471	1	-3.03181	-1.21471	1.12597e-06
AQP4	0.143534	-0.170085	0.938621	0.202038	-0.170085	1	0.0585038	-0.170085	0.984066
AQP4-AS1	1.08763	-1.8727	0.442288	1.09718	-1.8727	0.689517	0.0095476	-1.8727	1
AQP5	0.396511	-0.00713471	0.67891	1.21582	-0.00713471	0.00607496	0.819314	-0.00713471	0.133776
AQP6	-0.135569	-1.22425	0.970576	0.443795	-1.22425	0.96987	0.579364	-1.22425	0.731943
AQP7	0.460141	5.09697	0.15427	0.455995	5.09697	0.374249	-0.00414606	5.09697	1
AQP7P1	0.465816	5.15129	0.146651	0.492092	5.15129	0.285927	0.0262756	5.15129	0.991998
AQP7P3	-1.92196	-2.96195	0.51313	-1.70823	-2.96195	0.883542	0.213728	-2.96195	1
AQP8	0.625665	-1.52453	0.623634	0.000524168	-1.52453	1	-0.625141	-1.52453	0.730298
UCHL1	2.72995	6.62488	3.717e-42	1.63568	6.62488	9.38603e-11	-1.09427	6.62488	0.000109216
AQR	0.0247617	6.16568	0.99325	0.0110022	6.16568	1	-0.0137595	6.16568	0.999783
AR	-0.386578	6.62833	0.287992	0.220003	6.62833	0.93521	0.606581	6.62833	0.0569788
ARAF	0.0730205	4.83855	0.956107	-0.000633969	4.83855	1	-0.0736545	4.83855	0.956391
ARAP1	-0.0676854	6.27397	0.961165	0.0522706	6.27397	1	0.119956	6.27397	0.909884
ARAP2	0.303845	3.97654	0.534633	0.100717	3.97654	1	-0.203127	3.97654	0.811487
ARAP3	-0.258836	4.98677	0.642029	-0.397718	4.98677	0.507337	-0.138882	4.98677	0.895269
ARC	0.0640841	1.68898	0.974285	-0.414455	1.68898	0.658498	-0.478539	1.68898	0.429627
ARCN1	0.0454707	7.49776	0.978303	-0.049121	7.49776	1	-0.0945916	7.49776	0.937886
AREG	1.1333	-0.953671	0.0535078	0.381412	-0.953671	0.999399	-0.751893	-0.953671	0.485988
AREL1	0.0943354	5.20834	0.932304	-0.0781482	5.20834	1	-0.172484	5.20834	0.850226
ARF1	0.174099	7.32467	0.811106	0.0110259	7.32467	1	-0.163073	7.32467	0.859703
ARF3	0.0458457	5.86252	0.978303	-0.0566344	5.86252	1	-0.10248	5.86252	0.930988
ARF4	0.134066	6.91313	0.880914	-0.309601	6.91313	0.733398	-0.443667	6.91313	0.292395
ARF4-AS1	0.162907	-0.457372	0.935544	-0.379539	-0.457372	0.967274	-0.542446	-0.457372	0.658616
ARF5	-0.0889272	5.09945	0.938833	-0.199517	5.09945	0.965552	-0.11059	5.09945	0.924022
ARF6	0.121588	6.35588	0.899181	0.0436203	6.35588	1	-0.0779678	6.35588	0.951636
ARFGAP1	-0.218629	4.89532	0.731906	-0.137934	4.89532	1	0.0806954	4.89532	0.951162
ARFGAP2	-0.132863	5.99143	0.883718	0.00869306	5.99143	1	0.141556	5.99143	0.886815
ARFGAP3	-0.0658168	5.91071	0.963213	-0.186524	5.91071	0.977481	-0.120708	5.91071	0.910696
ARFGEF1	0.0928986	6.95902	0.932566	0.100992	6.95902	1	0.00809366	6.95902	1
ARFGEF2	0.000782412	7.37575	1	-0.191877	7.37575	0.970288	-0.192659	7.37575	0.814969
ARFGEF3	0.321619	5.24555	0.476499	0.849954	5.24555	0.00261767	0.528334	5.24555	0.161932
ARFIP1	0.153758	5.27326	0.851707	0.092177	5.27326	1	-0.061581	5.27326	0.963524
ARFIP2	-0.140081	4.51087	0.875835	-0.0818759	4.51087	1	0.058205	4.51087	0.967054
ARFRP1	-0.0327014	4.68233	0.988085	-0.178536	4.68233	0.990045	-0.145835	4.68233	0.886333
ARG1	-0.0696543	-0.180798	0.980843	0.0240073	-0.180798	1	0.0936616	-0.180798	0.967972
ARG2	0.0499099	4.47366	0.976496	-0.233879	4.47366	0.92371	-0.283789	4.47366	0.66667
ARGFX	-0.0662206	-1.14684	0.990495	-0.324725	-1.14684	1	-0.258504	-1.14684	0.927081
ARGFXP2	-0.167221	-0.0280031	0.918805	-0.215195	-0.0280031	1	-0.0479748	-0.0280031	0.991333
ARGLU1	-0.115908	6.23677	0.906908	0.0346917	6.23677	1	0.1506	6.23677	0.875519
ARHGAP1	-0.170663	6.65187	0.818396	0.0937293	6.65187	1	0.264393	6.65187	0.684012
ARHGAP10	0.0194235	6.21744	0.995567	-0.0158757	6.21744	1	-0.0352992	6.21744	0.984066
SLC26A7	2.72649	5.18224	1.22679e-39	1.2097	5.18224	1.18906e-05	-1.51679	5.18224	6.51458e-09
CA1	2.66626	1.99321	1.5543e-28	0.979333	1.99321	0.021205	-1.68693	1.99321	6.12101e-09
ARHGAP12	-0.286039	6.44995	0.552101	0.241687	6.44995	0.897059	0.527726	6.44995	0.136875
ARHGAP15	0.280825	3.39681	0.604806	-0.291764	3.39681	0.8278	-0.572588	3.39681	0.141305
ARHGAP17	-0.042244	5.43071	0.980843	0.00156196	5.43071	1	0.043806	5.43071	0.978022
ARHGAP18	0.255615	5.80991	0.639841	-0.00574423	5.80991	1	-0.261359	5.80991	0.693876
ARHGAP19	-0.088008	3.33557	0.94631	0.141908	3.33557	1	0.229916	3.33557	0.7742
ARHGAP19-SLIT1	-0.0393874	1.98333	0.98659	0.104153	1.98333	1	0.14354	1.98333	0.909359
ARHGAP20	0.206388	5.56503	0.751812	-0.516127	5.56503	0.231821	-0.722515	5.56503	0.020178
ARHGAP21	0.139797	8.54586	0.871266	0.00673741	8.54586	1	-0.133059	8.54586	0.895963
ARHGAP22	-0.0637274	3.58262	0.968864	-0.0327572	3.58262	1	0.0309702	3.58262	0.989882
ARHGAP23	-0.028149	5.32989	0.990854	0.125405	5.32989	1	0.153554	5.32989	0.875148
ARHGAP24	-0.249256	5.1877	0.661572	-0.413222	5.1877	0.456149	-0.163966	5.1877	0.863868
ARHGAP25	0.415943	3.83223	0.251238	-0.0906764	3.83223	1	-0.506619	3.83223	0.220759
ARHGAP26	0.0130372	5.61393	0.998475	0.13942	5.61393	1	0.126383	5.61393	0.904353
ARHGAP26-AS1	0.321502	-0.754439	0.844779	0.680528	-0.754439	0.646015	0.359026	-0.754439	0.836874
ARHGAP26-IT1	-0.0542754	-0.574881	0.989732	-0.394048	-0.574881	0.955987	-0.339773	-0.574881	0.846307
ARHGAP27	-0.107088	3.8472	0.921449	-0.0890018	3.8472	1	0.0180858	3.8472	0.998982
ARHGAP28	-0.103553	5.46491	0.921532	-0.221029	5.46491	0.933809	-0.117476	5.46491	0.918224
ARHGAP29	0.179549	6.89325	0.800927	0.183978	6.89325	0.978925	0.00442893	6.89325	1
HBG1	2.62903	1.40096	3.61335e-23	1.04534	1.40096	0.020724	-1.5837	1.40096	2.82771e-07
ARHGAP31	0.211954	6.91482	0.738556	-0.335099	6.91482	0.660158	-0.547053	6.91482	0.131411
ARHGAP31-AS1	-0.317156	0.245331	0.740448	-0.691692	0.245331	0.411855	-0.374536	0.245331	0.767521
ARHGAP32	-0.0450266	5.8484	0.978437	0.129677	5.8484	1	0.174703	5.8484	0.843825
ARHGAP33	0.192361	2.84854	0.810416	0.413621	2.84854	0.536767	0.22126	2.84854	0.797819
ARHGAP35	-0.184342	7.36998	0.79112	-0.0968182	7.36998	1	0.0875234	7.36998	0.943925
ARHGAP36	0.293582	1.69979	0.665221	0.239128	1.69979	0.965552	-0.054454	1.69979	0.977171
ARHGAP39	-0.0806955	2.68856	0.954007	-0.0134227	2.68856	1	0.0672728	2.68856	0.96379
ARHGAP4	0.0953417	4.73136	0.932273	-0.104566	4.73136	1	-0.199908	4.73136	0.814969
ARHGAP40	0.0664	-0.668293	0.986478	0.118733	-0.668293	1	0.0523333	-0.668293	0.991873
ARHGAP42	0.14549	5.77626	0.864832	0.364671	5.77626	0.579408	0.219181	5.77626	0.769443
ARHGAP44	-0.0651248	2.52778	0.971561	0.295663	2.52778	0.853239	0.360788	2.52778	0.562148
ARHGAP45	0.18059	4.61014	0.8062	-0.0881813	4.61014	1	-0.268771	4.61014	0.693762
ARHGAP5	-0.131066	7.52218	0.884927	0.0445979	7.52218	1	0.175663	7.52218	0.837575
ARHGAP5-AS1	-0.466467	0.458734	0.483172	-0.02429	0.458734	1	0.442177	0.458734	0.635639
ARHGAP6	0.0136804	4.3347	0.998411	0.278555	4.3347	0.830393	0.264875	4.3347	0.694632
ARHGAP8	0.181365	-0.85573	0.940533	0.779284	-0.85573	0.499663	0.597918	-0.85573	0.61437
ARHGAP9	0.456356	2.35129	0.229051	-0.277524	2.35129	0.900903	-0.73388	2.35129	0.0451482
ARHGDIA	0.107144	6.78844	0.914291	-0.00957067	6.78844	1	-0.116714	6.78844	0.915924
ARHGDIB	0.339504	5.79441	0.414831	-0.219626	5.79441	0.936968	-0.55913	5.79441	0.119705
ARHGDIG	1.28817	0.996982	1.34886e-05	0.833891	0.996982	0.133649	-0.454276	0.996982	0.561099
ARHGEF1	-0.0249039	5.2544	0.99334	-0.0153601	5.2544	1	0.00954378	5.2544	1
ARHGEF10	-0.084813	6.72751	0.943128	0.208431	6.72751	0.951725	0.293244	6.72751	0.616218
ARHGEF10L	0.0561284	5.76873	0.973374	0.229061	5.76873	0.916829	0.172933	5.76873	0.845878
ARHGEF11	-0.0348453	6.41395	0.986478	0.0354305	6.41395	1	0.0702757	6.41395	0.958096
ARHGEF12	0.116586	8.15195	0.90431	0.117007	8.15195	1	0.000420558	8.15195	1
ARHGEF15	0.0388834	4.03624	0.9839	-0.344699	4.03624	0.683733	-0.383582	4.03624	0.469542
ARHGEF16	0.0727426	0.43218	0.97542	-0.152926	0.43218	1	-0.225669	0.43218	0.875519
ARHGEF17	0.0575997	5.52004	0.972135	0.035833	5.52004	1	-0.0217666	5.52004	0.995445
ARHGEF18	-0.00296198	5.16105	1	0.0575501	5.16105	1	0.0605121	5.16105	0.964417
ARHGEF19	0.39148	2.72708	0.365207	0.424876	2.72708	0.509611	0.0333959	2.72708	0.989627
ARHGEF2	0.238899	6.92882	0.678533	0.234008	6.92882	0.90611	-0.00489174	6.92882	1
ARHGEF25	-0.758236	4.64739	0.00165538	-0.255504	4.64739	0.886235	0.502733	4.64739	0.21021
ARHGEF26	-0.102321	4.35767	0.923885	0.281989	4.35767	0.822315	0.38431	4.35767	0.448907
ARHGEF26-AS1	-0.0841822	-1.52263	0.98659	-0.0883169	-1.52263	1	-0.00413475	-1.52263	1
ARHGEF28	0.0411744	4.39786	0.98298	-0.232107	4.39786	0.927749	-0.273281	4.39786	0.69074
ARHGEF3	-0.0974549	5.2178	0.928397	0.0122395	5.2178	1	0.109694	5.2178	0.924022
ARHGEF33	-0.246778	1.55838	0.751103	-0.271246	1.55838	0.932158	-0.0244683	1.55838	0.997382
ARHGEF34P	0.0271177	2.86393	0.993245	0.27328	2.86393	0.876082	0.246163	2.86393	0.764137
ARHGEF35	0.164394	2.15165	0.867804	0.283142	2.15165	0.891083	0.118748	2.15165	0.928969
ARHGEF37	-0.120318	3.63473	0.909859	0.151911	3.63473	1	0.272229	3.63473	0.707333
ARHGEF38	-0.181342	1.18922	0.872406	0.436466	1.18922	0.645391	0.617808	1.18922	0.223125
ARHGEF38-IT1	-0.0239389	-2.77673	1	1.60224	-2.77673	0.774357	1.62618	-2.77673	0.619764
ARHGEF39	0.165963	3.76307	0.838586	0.0762244	3.76307	1	-0.0897384	3.76307	0.945963
ARHGEF3-AS1	-0.62311	-0.758575	0.478549	0.0186878	-0.758575	1	0.641798	-0.758575	0.585669
ARHGEF4	0.0700335	2.93484	0.964335	-0.261255	2.93484	0.901182	-0.331289	2.93484	0.616704
ARHGEF40	-0.1793	6.02224	0.802881	-0.32045	6.02224	0.706897	-0.14115	6.02224	0.888454
ARHGEF5	0.0332827	3.57971	0.988519	0.246512	3.57971	0.906339	0.213229	3.57971	0.797309
ARHGEF6	0.4001	6.60551	0.25045	0.190652	6.60551	0.974376	-0.209448	6.60551	0.792379
ARHGEF7	0.0719438	6.71824	0.95609	-0.00199901	6.71824	1	-0.0739428	6.71824	0.954866
ARHGEF7-AS1	0.568029	-0.774862	0.577355	0.500199	-0.774862	0.909165	-0.0678308	-0.774862	0.986359
ARHGEF7-AS2	0.230195	1.09739	0.806897	0.201706	1.09739	1	-0.0284894	1.09739	0.995569
ARHGEF9	-0.103431	4.18617	0.923354	0.148151	4.18617	1	0.251583	4.18617	0.728675
ARHGEF9-IT1	0.0463599	-1.74711	0.997674	0.569188	-1.74711	0.958455	0.522828	-1.74711	0.83161
ARID1A	-0.105612	6.39459	0.916879	0.0949901	6.39459	1	0.200603	6.39459	0.799625
ARID1B	-0.189077	6.60698	0.781179	0.0882788	6.60698	1	0.277355	6.60698	0.658732
ARID2	-0.127781	6.21551	0.891611	0.0432301	6.21551	1	0.171011	6.21551	0.848866
ARID3A	-0.10316	2.46893	0.933697	-0.0548069	2.46893	1	0.048353	2.46893	0.979321
ARID3B	-0.0397801	2.69183	0.985706	0.215821	2.69183	0.965552	0.255601	2.69183	0.747877
ARID3C	-0.23734	-0.0690092	0.864172	-0.117644	-0.0690092	1	0.119696	-0.0690092	0.957054
ARID4A	-0.0963392	5.49483	0.929241	0.178611	5.49483	0.98706	0.27495	5.49483	0.66667
ARID4B	-0.174103	6.35378	0.812671	0.0570981	6.35378	1	0.231201	6.35378	0.749554
ARID5A	-0.091972	3.74341	0.938252	-0.19865	3.74341	0.973225	-0.106678	3.74341	0.932663
ARID5B	0.138125	6.6878	0.873608	0.20005	6.6878	0.958455	0.0619249	6.6878	0.963229
ARIH1	-0.0476851	6.49928	0.977102	0.0284068	6.49928	1	0.076092	6.49928	0.952973
ARIH2	0.0115667	5.57584	0.999548	-0.0521627	5.57584	1	-0.0637294	5.57584	0.962619
ARIH2OS	0.0230787	1.76	0.995648	0.0902348	1.76	1	0.0671561	1.76	0.967513
ARL1	0.0549719	6.38789	0.974193	-0.0788249	6.38789	1	-0.133797	6.38789	0.89644
ARL10	-0.0227187	4.30763	0.994871	-0.0273273	4.30763	1	-0.00460856	4.30763	1
ARL11	0.0754801	2.87869	0.958158	-0.332226	2.87869	0.760182	-0.407706	2.87869	0.470832
ARL13A	0.0449474	-1.0755	0.994871	0.140498	-1.0755	1	0.095551	-1.0755	0.978581
ARL13B	0.0665656	4.21879	0.96435	0.304276	4.21879	0.765448	0.237711	4.21879	0.753322
ARL14	-0.897972	-1.94738	0.593777	-1.10591	-1.94738	0.749567	-0.207938	-1.94738	0.971317
ARL14EP	0.0247434	4.45286	0.993476	-0.00293457	4.45286	1	-0.027678	4.45286	0.991873
ARL14EPL	0.0931776	-1.89584	0.988981	-0.369209	-1.89584	1	-0.462387	-1.89584	0.891482
ARL15	0.147016	4.62773	0.865633	-0.0968543	4.62773	1	-0.24387	4.62773	0.740701
ARL16	-0.264674	1.8547	0.711132	-0.224345	1.8547	0.975254	0.0403283	1.8547	0.985566
ARL17A	-0.252009	3.824	0.675039	-0.0967995	3.824	1	0.155209	3.824	0.878884
ARL17B	-0.133864	0.0558858	0.942943	-0.0574606	0.0558858	1	0.076403	0.0558858	0.976595
ARL2	-0.00864894	5.77468	1	-0.169754	5.77468	0.993987	-0.161105	5.77468	0.865249
ARL2BP	0.0959767	4.79413	0.931193	-0.00260195	4.79413	1	-0.0985786	4.79413	0.936624
ARL2-SNX15	0.0142827	5.22366	0.99777	-0.0430038	5.22366	1	-0.0572866	5.22366	0.966687
ARL3	0.0258065	4.23696	0.992813	0.0338975	4.23696	1	0.00809099	4.23696	1
ARL4A	0.248637	4.64116	0.670246	0.219662	4.64116	0.942494	-0.0289752	4.64116	0.990994
ARL4C	-0.132343	4.81387	0.889169	-0.117523	4.81387	1	0.0148208	4.81387	0.999783
ARL4D	0.209555	3.48298	0.766466	-0.0329011	3.48298	1	-0.242456	3.48298	0.755998
ARL5A	0.115802	5.76898	0.907363	0.0418024	5.76898	1	-0.0739997	5.76898	0.954959
ARL5B	-0.160699	4.32477	0.843979	0.0597524	4.32477	1	0.220451	4.32477	0.7742
ARL5C	-0.118487	-0.186419	0.954139	-0.141559	-0.186419	1	-0.0230721	-0.186419	0.999837
ARL6	-0.0306312	2.26826	0.991743	0.0819454	2.26826	1	0.112577	2.26826	0.935617
ARL6IP1	0.221438	6.97009	0.718857	-0.100873	6.97009	1	-0.322311	6.97009	0.566476
ARL6IP4	0.0683517	5.21976	0.961165	0.0907824	5.21976	1	0.0224307	5.21976	0.994516
ARL6IP5	0.432363	7.39802	0.184236	0.197284	7.39802	0.96279	-0.235079	7.39802	0.742603
ARL6IP6	0.0323959	3.66811	0.989125	0.00918124	3.66811	1	-0.0232147	3.66811	0.994655
ARL8A	0.193035	4.74036	0.779548	0.118286	4.74036	1	-0.0747495	4.74036	0.955215
ARL8B	0.248637	6.58536	0.655427	0.0786346	6.58536	1	-0.170003	6.58536	0.850777
ARL9	-0.420936	-1.42768	0.827015	0.276969	-1.42768	1	0.697905	-1.42768	0.682279
ARMC1	0.253374	5.08029	0.652708	0.194044	5.08029	0.971165	-0.0593302	5.08029	0.965894
ARMC10	0.131173	4.92993	0.888298	0.198595	4.92993	0.965552	0.0674219	4.92993	0.961451
ARMC12	-0.0295113	0.687789	0.994871	-0.149941	0.687789	1	-0.120429	0.687789	0.949552
ARMC2	0.0971596	3.46548	0.933834	0.159715	3.46548	1	0.0625556	3.46548	0.965456
ARMC3	-0.534186	-0.781181	0.615401	0.224199	-0.781181	1	0.758385	-0.781181	0.455219
ARMC4	0.080946	-0.228244	0.97711	0.35187	-0.228244	0.953314	0.270924	-0.228244	0.869108
ARMC5	-0.222283	2.85071	0.749749	-0.111691	2.85071	1	0.110592	2.85071	0.933659
ARMC6	0.0553068	3.62165	0.974285	-0.144777	3.62165	1	-0.200084	3.62165	0.822349
ARMC7	-0.00420162	2.68635	1	-0.0193746	2.68635	1	-0.015173	2.68635	0.999783
ARMC8	0.0123	5.5652	0.998664	-0.060927	5.5652	1	-0.073227	5.5652	0.956391
ARMC9	-0.312876	3.19585	0.533745	-0.213216	3.19585	0.961031	0.09966	3.19585	0.940556
ARMCX1	-0.172078	5.76344	0.818081	0.100584	5.76344	1	0.272662	5.76344	0.667963
ARMCX2	-0.106711	4.56851	0.918495	-0.0480603	4.56851	1	0.0586505	4.56851	0.965894
ARMCX3	-0.0233494	6.17391	0.994072	-0.0456175	6.17391	1	-0.0222681	6.17391	0.994474
ARMCX4	-0.225552	4.18507	0.726925	0.0286931	4.18507	1	0.254245	4.18507	0.722535
ARMCX5	-0.136692	4.24124	0.88346	0.009043	4.24124	1	0.145735	4.24124	0.887139
ARMCX5-GPRASP2	-0.214198	4.62795	0.740985	0.147477	4.62795	1	0.361676	4.62795	0.480852
ARMCX6	-0.15435	3.69453	0.859444	-0.0485347	3.69453	1	0.105815	3.69453	0.932861
ARMS2	1.1333	-0.479227	0.00846845	0.36405	-0.479227	0.974329	-0.769254	-0.479227	0.31524
ARMT1	0.041517	4.42328	0.982497	-0.155389	4.42328	1	-0.196906	4.42328	0.822964
ARNT	-0.148201	6.6447	0.858323	0.276956	6.6447	0.817445	0.425157	6.6447	0.315914
ARNT2	-0.886881	3.14623	0.000316801	0.095586	3.14623	1	0.982467	3.14623	0.000673494
ARNTL	0.144293	3.00042	0.88346	-0.365854	3.00042	0.667241	-0.510147	3.00042	0.247334
ARNTL2	-0.228585	6.6446	0.70803	-0.647003	6.6446	0.056985	-0.418417	6.6446	0.359479
ARNTL2-AS1	-0.373171	2.95761	0.416075	-0.623237	2.95761	0.138688	-0.250066	2.95761	0.76826
ARPC1A	0.0394763	6.39833	0.983357	-0.0905865	6.39833	1	-0.130063	6.39833	0.900149
ARPC1B	0.257489	7.05237	0.631262	-0.208325	7.05237	0.951402	-0.465814	7.05237	0.247382
ARPC2	0.310826	7.19804	0.487146	-0.0324019	7.19804	1	-0.343228	7.19804	0.513109
ARPC3	0.214228	6.39518	0.734614	-0.0113795	6.39518	1	-0.225608	6.39518	0.763899
ARPC4	0.167631	5.95292	0.824383	-0.127564	5.95292	1	-0.295194	5.95292	0.628433
ARPC4-TTLL3	-0.187349	5.44122	0.78791	-0.0951542	5.44122	1	0.0921952	5.44122	0.941746
ARPC5	0.232672	6.41548	0.695346	-0.117059	6.41548	1	-0.349731	6.41548	0.498296
ARPC5L	0.14758	3.96273	0.868096	-0.227293	3.96273	0.936085	-0.374872	3.96273	0.482213
ARPIN	-0.102718	4.05991	0.924693	0.0710546	4.05991	1	0.173773	4.05991	0.853321
ARPP19	0.23701	6.98185	0.682478	-0.0975805	6.98185	1	-0.33459	6.98185	0.537921
ARPP21	0.189053	2.56172	0.826909	0.222709	2.56172	0.965552	0.0336563	2.56172	0.989875
ARR3	0.244184	-1.04955	0.910394	0.228433	-1.04955	1	-0.0157505	-1.04955	1
ARRB1	0.160787	7.10117	0.834353	-0.255837	7.10117	0.869203	-0.416625	7.10117	0.353732
ARRB2	0.519177	3.27198	0.097877	0.0424029	3.27198	1	-0.476774	3.27198	0.29058
ARRDC1	0.0874871	3.30031	0.946809	0.148029	3.30031	1	0.060542	3.30031	0.966687
ARRDC1-AS1	0.205511	1.47593	0.827015	0.497007	1.47593	0.464286	0.291496	1.47593	0.745526
ARRDC2	0.22035	4.99265	0.728083	0.157244	4.99265	1	-0.0631055	4.99265	0.962953
ARRDC3	0.139003	6.05707	0.873369	0.321535	6.05707	0.695939	0.182533	6.05707	0.830027
ARRDC3-AS1	-0.052281	0.849646	0.983392	0.08587	0.849646	1	0.138151	0.849646	0.934251
ARRDC4	0.668472	5.48473	0.00736269	0.352235	5.48473	0.611473	-0.316236	5.48473	0.584442
ARRDC5	-0.516112	-0.606604	0.555326	-0.385743	-0.606604	0.954004	0.130369	-0.606604	0.962096
ARSA	-0.0877494	5.1215	0.940042	-0.027789	5.1215	1	0.0599604	5.1215	0.965466
ARSB	-0.248075	4.94045	0.666698	-0.14822	4.94045	1	0.0998548	4.94045	0.936101
ARSD	0.24029	5.45561	0.683409	-0.0745366	5.45561	1	-0.314827	5.45561	0.591611
ARSE	-0.167694	1.57932	0.872289	-0.330235	1.57932	0.840172	-0.162542	1.57932	0.900409
ARSF	0.284965	-0.656178	0.878291	0.970468	-0.656178	0.209348	0.685503	-0.656178	0.451596
ARSG	0.136406	4.40062	0.88346	0.25064	4.40062	0.889972	0.114234	4.40062	0.920574
ARSH	0.333221	-0.82534	0.820526	0.361375	-0.82534	0.98131	0.0281539	-0.82534	0.999783
ARSI	0.286619	3.33533	0.595875	-0.082513	3.33533	1	-0.369132	3.33533	0.50618
ARSJ	-0.561307	2.47007	0.0935103	-0.0981773	2.47007	1	0.463129	2.47007	0.374959
ARSK	0.103597	2.92678	0.929153	0.0755217	2.92678	1	-0.0280757	2.92678	0.991998
ART1	-0.643215	-1.30228	0.661263	0.478855	-1.30228	0.959158	1.12207	-1.30228	0.313396
ART3	0.0967593	-0.774038	0.976496	0.210675	-0.774038	1	0.113916	-0.774038	0.967276
ART4	-0.587205	-0.910241	0.5896	-0.0702123	-0.910241	1	0.516993	-0.910241	0.7689
ART5	-0.453488	0.837273	0.462795	0.22979	0.837273	0.99458	0.683278	0.837273	0.221201
ARTN	0.0074192	0.354016	1	-0.175285	0.354016	1	-0.182704	0.354016	0.912341
ARV1	0.132928	3.44394	0.893241	-0.17379	3.44394	0.999399	-0.306718	3.44394	0.639536
ARVCF	0.189692	3.33317	0.804073	0.142874	3.33317	1	-0.0468183	3.33317	0.97777
ARX	0.3666	1.25805	0.555856	0.313308	1.25805	0.89709	-0.0532918	1.25805	0.979302
AS3MT	-0.170615	3.83982	0.831884	0.0724062	3.83982	1	0.243021	3.83982	0.756948
ASAH1	0.268846	7.66441	0.596178	0.22089	7.66441	0.927497	-0.0479563	7.66441	0.975253
ASAH2	-0.299215	-0.751459	0.84803	-0.09559	-0.751459	1	0.203625	-0.751459	0.937701
ASAH2B	0.0102023	-0.583268	1	-0.38873	-0.583268	0.965552	-0.398932	-0.583268	0.800452
ASAP1	-0.0450497	5.84357	0.978437	-0.152016	5.84357	1	-0.106966	5.84357	0.926941
ASAP1-IT1	-0.362543	1.19265	0.551765	-0.557125	1.19265	0.414034	-0.194582	1.19265	0.88615
ASAP1-IT2	0.580683	-0.182375	0.353862	-0.265635	-0.182375	1	-0.846317	-0.182375	0.239191
ASAP2	0.0517709	5.97072	0.974726	0.0265139	5.97072	1	-0.025257	5.97072	0.991998
ASAP3	-0.297823	6.04947	0.525202	0.142603	6.04947	1	0.440426	6.04947	0.295455
ASB1	0.126509	5.48099	0.893851	0.184391	5.48099	0.979119	0.057882	5.48099	0.966129
ASB10	0.227172	-0.0410394	0.871171	-0.430248	-0.0410394	0.898168	-0.657419	-0.0410394	0.451596
ASB11	0.312961	-0.625437	0.826017	0.600049	-0.625437	0.709111	0.287088	-0.625437	0.872972
ASB12	0.611569	-1.36858	0.574409	-0.941506	-1.36858	0.69686	-1.55307	-1.36858	0.109362
ASB13	-0.313546	4.34128	0.512412	-0.111603	4.34128	1	0.201943	4.34128	0.808028
ASB14	0.0242833	4.03925	0.994005	0.125836	4.03925	1	0.101552	4.03925	0.935811
ASB15	-0.315761	-1.18069	0.880179	-0.0843645	-1.18069	1	0.231397	-1.18069	0.939711
ASB16	-0.259454	1.01278	0.759999	-0.0915977	1.01278	1	0.167856	1.01278	0.904384
ASB16-AS1	-0.26628	-0.436689	0.865871	0.0695774	-0.436689	1	0.335858	-0.436689	0.832984
ASB17	-0.142382	-2.19312	0.981362	-0.878262	-2.19312	0.944041	-0.73588	-2.19312	0.845144
ASB18	0.0841523	-1.01953	0.98298	0.0761468	-1.01953	1	-0.00800547	-1.01953	1
ASB2	-0.0546227	1.35264	0.979351	0.283976	1.35264	0.911245	0.338599	1.35264	0.679762
ASB3	-0.0761613	4.09163	0.954114	0.0731652	4.09163	1	0.149327	4.09163	0.882934
ASB4	0.338568	1.35395	0.609885	0.189347	1.35395	1	-0.149221	1.35395	0.913099
ASB5	-0.309605	-0.510168	0.834353	0.27974	-0.510168	1	0.589345	-0.510168	0.595555
ASB6	0.0992472	4.19555	0.928397	0.127145	4.19555	1	0.0278981	4.19555	0.991848
ASB7	-0.125359	4.42357	0.898742	0.0318034	4.42357	1	0.157162	4.42357	0.872972
ASB8	-0.151535	4.12134	0.861726	0.108973	4.12134	1	0.260509	4.12134	0.712216
ASB9	-0.751491	-0.965181	0.40205	0.326528	-0.965181	0.998302	1.07802	-0.965181	0.194871
ASB9P1	-0.639631	-1.22965	0.604504	0.495807	-1.22965	0.91893	1.13544	-1.22965	0.21845
ASCC1	-0.0731001	4.17625	0.956927	-0.00858272	4.17625	1	0.0645174	4.17625	0.96295
ASCC2	0.172983	5.4805	0.81698	0.130834	5.4805	1	-0.0421492	5.4805	0.979863
ASCC3	0.087034	6.31092	0.939613	-0.0118453	6.31092	1	-0.0988793	6.31092	0.935424
ASCL1	0.147126	-0.289287	0.939717	-0.129001	-0.289287	1	-0.276127	-0.289287	0.869341
ASCL2	0.66949	0.65813	0.112625	1.10183	0.65813	0.00638787	0.432345	0.65813	0.570697
ASCL3	1.02831	-2.27131	0.583045	0.275114	-2.27131	1	-0.753194	-2.27131	0.791458
ASCL4	-0.256692	-0.192961	0.850874	0.104088	-0.192961	1	0.36078	-0.192961	0.782917
ASCL5	0.248358	1.9947	0.739661	0.498404	1.9947	0.402977	0.250046	1.9947	0.774818
ASF1A	-0.0327298	4.02164	0.988519	0.10676	4.02164	1	0.13949	4.02164	0.895054
ASF1B	0.124368	2.81252	0.909008	-0.499955	2.81252	0.353988	-0.624323	2.81252	0.119111
ASGR1	0.432082	3.7983	0.234104	0.469061	3.7983	0.360102	0.0369786	3.7983	0.984066
ASGR2	0.229834	-1.22455	0.921559	-0.592818	-1.22455	0.912643	-0.822652	-1.22455	0.562093
ASH1L	0.0236967	8.54056	0.993586	0.106293	8.54056	1	0.0825965	8.54056	0.948074
ASH1L-AS1	0.126629	4.37245	0.896801	0.128366	4.37245	1	0.00173715	4.37245	1
ASH2L	-0.0476535	5.61102	0.977348	0.0773765	5.61102	1	0.12503	5.61102	0.905567
ASIC1	-0.110057	2.22984	0.928354	0.394204	2.22984	0.612372	0.504261	2.22984	0.2925
ASIC2	-0.112706	0.641089	0.94631	-0.24377	0.641089	0.992742	-0.131065	0.641089	0.942122
ASIC3	0.0916291	-0.329208	0.974285	-0.00738336	-0.329208	1	-0.0990125	-0.329208	0.968185
ASIC4	0.0454069	-0.468809	0.992653	-0.0119977	-0.468809	1	-0.0574046	-0.468809	0.988841
ASIC5	-0.242527	-0.727197	0.891929	-0.00688393	-0.727197	1	0.235643	-0.727197	0.913913
ASIP	-0.295971	-0.0652182	0.804352	0.409932	-0.0652182	0.899739	0.705903	-0.0652182	0.386314
ASL	-0.0704108	3.65234	0.961851	-0.0603797	3.65234	1	0.0100311	3.65234	1
ASMT	0.186763	1.98761	0.833595	0.238537	1.98761	0.957092	0.0517743	1.98761	0.977171
ASMTL	-0.143012	2.40087	0.891593	-0.0395734	2.40087	1	0.103439	2.40087	0.941763
ASMTL-AS1	-0.297286	-0.0629432	0.790203	-0.127707	-0.0629432	1	0.169579	-0.0629432	0.935213
ASNA1	-0.064906	4.75775	0.964654	-0.0594792	4.75775	1	0.00542688	4.75775	1
ASNS	0.559678	3.77008	0.0538271	-0.163923	3.77008	1	-0.723601	3.77008	0.0298867
ASNSD1	0.0236971	5.5306	0.993946	-0.0127213	5.5306	1	-0.0364184	5.5306	0.983614
ASPA	-0.101308	3.57971	0.929833	-0.408775	3.57971	0.539	-0.307467	3.57971	0.646267
ASPDH	-0.212861	-1.29927	0.932943	-0.0480731	-1.29927	1	0.164788	-1.29927	0.960349
ASPG	-0.650255	-0.846052	0.436506	-0.197474	-0.846052	1	0.45278	-0.846052	0.783702
HBG2	2.62903	1.40096	3.61335e-23	1.04534	1.40096	0.020724	-1.5837	1.40096	2.82771e-07
ASPHD1	0.106008	-0.590236	0.971568	0.238484	-0.590236	1	0.132476	-0.590236	0.957883
ASPHD2	0.156705	0.51788	0.910394	-0.0980067	0.51788	1	-0.254712	0.51788	0.842615
GYPB	2.58224	0.730329	1.09404e-19	0.462352	0.730329	0.840065	-2.11989	0.730329	6.37761e-10
ASPN	-0.697512	7.49799	0.00537859	-1.53359	7.49799	4.24707e-10	-0.836083	7.49799	0.00303563
ASPRV1	-0.390297	0.0186799	0.74214	1.17318	0.0186799	0.0163292	1.56348	0.0186799	0.000301483
ASPSCR1	0.177629	3.8098	0.819351	-0.0451677	3.8098	1	-0.222797	3.8098	0.784239
AS-PTPRE	0.136034	0.565117	0.923885	-0.63165	0.565117	0.445824	-0.767684	0.565117	0.187567
ASRGL1	0.422236	3.79665	0.236728	-0.24427	3.79665	0.911124	-0.666506	3.79665	0.0510622
ASS1	0.362334	2.9038	0.432995	0.300012	2.9038	0.8278	-0.0623222	2.9038	0.967099
ASTE1	-0.0429167	3.15128	0.98298	0.00126674	3.15128	1	0.0441835	3.15128	0.980509
ASTL	-0.134344	-1.30093	0.970576	-0.0831243	-1.30093	1	0.0512199	-1.30093	0.996651
ASTN1	-0.61084	1.87131	0.0756615	-0.35177	1.87131	0.764421	0.25907	1.87131	0.782108
ASTN2	0.246215	3.22213	0.701999	0.338667	3.22213	0.710381	0.0924523	3.22213	0.945963
ASTN2-AS1	0.120995	-0.832215	0.969738	0.696181	-0.832215	0.618164	0.575186	-0.832215	0.644888
ASUN	-0.162815	4.35204	0.838612	-0.235938	4.35204	0.916677	-0.0731228	4.35204	0.957421
ASXL1	-0.211115	5.83629	0.740086	0.0645644	5.83629	1	0.27568	5.83629	0.664233
ASXL2	0.109557	6.31602	0.911986	0.0676775	6.31602	1	-0.0418791	6.31602	0.979863
ASXL3	0.251297	2.98186	0.703851	0.114112	2.98186	1	-0.137185	2.98186	0.90541
ASZ1	0.810627	-1.25689	0.440379	1.04011	-1.25689	0.400163	0.229485	-1.25689	0.934113
ATAD1	0.024539	5.22617	0.993419	-0.085174	5.22617	1	-0.109713	5.22617	0.924237
ATAD2	-0.157088	5.53592	0.846964	-0.0439594	5.53592	1	0.113129	5.53592	0.92
ATAD2B	-0.0179856	6.19121	0.997265	-0.0174436	6.19121	1	0.000541926	6.19121	1
ATAD3A	0.10222	4.31394	0.923675	-0.239863	4.31394	0.911245	-0.342083	4.31394	0.54321
ATAD3B	0.1167	4.32399	0.908403	-0.244198	4.32399	0.904711	-0.360898	4.32399	0.499246
ATAD3C	0.0227037	3.42704	0.994871	-0.427668	3.42704	0.477812	-0.450371	3.42704	0.347316
ATAD5	0.192497	3.22213	0.799068	-0.176924	3.22213	0.998434	-0.369421	3.22213	0.512836
ATAT1	-0.169138	2.66437	0.848364	-0.0944219	2.66437	1	0.0747157	2.66437	0.961451
ATCAY	-0.0827379	0.0580709	0.974285	-0.384395	0.0580709	0.908012	-0.301657	0.0580709	0.835168
ATE1	-0.0532091	5.37777	0.974285	-0.0642838	5.37777	1	-0.0110747	5.37777	1
ATE1-AS1	-0.239363	1.28625	0.782023	0.0494651	1.28625	1	0.288828	1.28625	0.761605
ATF1	-0.0905374	4.32919	0.938621	0.140165	4.32919	1	0.230703	4.32919	0.763899
ATF2	0.0533232	6.03999	0.974285	0.179707	6.03999	0.984167	0.126384	6.03999	0.904221
SNCA	2.53577	3.16173	8.45689e-29	1.1057	3.16173	0.000763546	-1.43007	3.16173	8.75298e-08
ATF4	-0.023881	7.70446	0.993476	-0.144425	7.70446	1	-0.120544	7.70446	0.909884
ATF5	0.259856	5.52648	0.635428	-0.42566	5.52648	0.434349	-0.685516	5.52648	0.0291323
ATF6	0.148031	6.45455	0.858602	0.141045	6.45455	1	-0.00698532	6.45455	1
ATF6B	-0.108848	5.14144	0.913827	0.0227038	5.14144	1	0.131552	5.14144	0.900149
ATF7	-0.250569	5.40793	0.657673	0.0873281	5.40793	1	0.337897	5.40793	0.532177
ATF7IP	-0.132226	7.59641	0.883231	0.0699487	7.59641	1	0.202175	7.59641	0.79612
ATF7IP2	-0.18919	2.21332	0.826017	-0.464586	2.21332	0.485686	-0.275396	2.21332	0.752706
ATG10	0.277134	2.19243	0.678533	0.546437	2.19243	0.28662	0.269303	2.19243	0.741036
ATG101	-0.0242421	4.26375	0.993859	-0.147	4.26375	1	-0.122758	4.26375	0.91315
ATG12	0.0484942	5.56553	0.976774	0.0290897	5.56553	1	-0.0194045	5.56553	0.997566
ATG13	-0.0711958	5.71463	0.95697	-0.0125517	5.71463	1	0.0586441	5.71463	0.965894
ATG14	-0.244369	4.76683	0.678429	0.0526838	4.76683	1	0.297053	4.76683	0.628433
ATG16L1	0.069653	4.78203	0.959626	0.0765066	4.78203	1	0.00685362	4.78203	1
ATG16L2	-0.0114933	3.07977	1	0.0139625	3.07977	1	0.0254558	3.07977	0.993027
ATG2A	-0.0668193	5.55566	0.962854	-0.0395134	5.55566	1	0.0273058	5.55566	0.991796
ATG2B	0.0606242	6.52557	0.968946	0.0305706	6.52557	1	-0.0300535	6.52557	0.989869
ATG3	0.27183	5.36384	0.596086	0.0998307	5.36384	1	-0.172	5.36384	0.850445
ATG4A	0.520966	4.21152	0.0801563	-0.125293	4.21152	1	-0.64626	4.21152	0.0606404
ATG4B	-0.0424158	4.60202	0.981362	0.029628	4.60202	1	0.0720438	4.60202	0.957883
ATG4C	-0.0671558	5.01989	0.963213	-0.255852	5.01989	0.87732	-0.188696	5.01989	0.829048
ATG4D	0.0209092	3.38567	0.995176	-0.00179423	3.38567	1	-0.0227035	3.38567	0.995754
ATG5	0.214054	5.19114	0.738968	0.0800075	5.19114	1	-0.134047	5.19114	0.897764
ATG7	-0.186515	5.62327	0.789307	0.00835596	5.62327	1	0.194871	5.62327	0.813622
ATG9A	0.0264618	5.13488	0.992381	-0.164745	5.13488	0.999185	-0.191207	5.13488	0.82517
ATG9B	-0.0541422	1.76856	0.978437	0.367883	1.76856	0.723301	0.422025	1.76856	0.494401
ATIC	0.0942071	4.17246	0.934189	-0.00120161	4.17246	1	-0.0954087	4.17246	0.941298
ATL1	-0.184461	2.71833	0.826017	0.588102	2.71833	0.16586	0.772563	2.71833	0.0157488
ATL2	-0.046934	5.59579	0.977953	0.073131	5.59579	1	0.120065	5.59579	0.912341
ATL3	0.127393	8.80219	0.891297	-0.0884746	8.80219	1	-0.215867	8.80219	0.774578
ATM	-0.182008	6.66044	0.7971	0.0573255	6.66044	1	0.239333	6.66044	0.735828
ATMIN	0.0383363	5.69643	0.983392	0.061581	5.69643	1	0.0232447	5.69643	0.993027
ATN1	-0.148498	5.65897	0.859444	0.217096	5.65897	0.937714	0.365595	5.65897	0.464223
ATOH1	0.0777576	-0.679636	0.983392	0.921458	-0.679636	0.237876	0.8437	-0.679636	0.287072
ATOH7	0.431453	-0.30651	0.64023	0.477487	-0.30651	0.811131	0.0460334	-0.30651	0.991333
ATOH8	0.0556318	4.12453	0.974285	0.0942671	4.12453	1	0.0386352	4.12453	0.982698
ATOX1	0.23311	4.49289	0.703851	0.0107145	4.49289	1	-0.222396	4.49289	0.777333
ATP10A	-0.113246	5.29586	0.91015	-0.470968	5.29586	0.31073	-0.357722	5.29586	0.489831
ATP10B	-0.191112	1.20041	0.857391	0.26255	1.20041	0.949688	0.453663	1.20041	0.494929
ATP10D	0.374428	6.16179	0.316835	0.340303	6.16179	0.637352	-0.0341249	6.16179	0.985315
ATP11A	0.0124294	5.69759	0.998664	0.00263256	5.69759	1	-0.00979687	5.69759	1
ATP11A-AS1	0.136974	1.0322	0.914794	-0.301662	1.0322	0.92371	-0.438636	1.0322	0.545473
ATP11AUN	-0.0885549	0.900794	0.963213	0.0146598	0.900794	1	0.103215	0.900794	0.95449
ATP11B	0.12517	7.16312	0.893851	0.110463	7.16312	1	-0.0147064	7.16312	0.999783
ATP11C	-0.120315	5.67675	0.90208	0.11913	5.67675	1	0.239445	5.67675	0.738641
ATP12A	0.130506	-0.465471	0.954561	0.308628	-0.465471	0.988199	0.178122	-0.465471	0.932861
ATP13A1	0.0113474	5.0638	0.999885	0.135341	5.0638	1	0.123994	5.0638	0.908602
ATP13A2	0.109928	5.42957	0.912619	-0.0557546	5.42957	1	-0.165683	5.42957	0.859703
ATP13A3	0.473386	7.39025	0.117522	0.0239527	7.39025	1	-0.449434	7.39025	0.296392
ATP13A4	0.110693	2.63656	0.926372	0.604469	2.63656	0.164626	0.493775	2.63656	0.330701
ATP13A4-AS1	0.132052	-0.670568	0.963213	0.789874	-0.670568	0.433801	0.657822	-0.670568	0.524268
ATP13A5	-0.14729	0.733268	0.935804	1.57287	0.733268	3.77417e-05	1.72016	0.733268	6.90189e-06
ATP13A5-AS1	0.356731	-1.69699	0.911806	1.9663	-1.69699	0.0116265	1.60957	-1.69699	0.0492544
ATP1A1	0.308984	7.59774	0.491075	-0.0264633	7.59774	1	-0.335447	7.59774	0.530407
ATP1A1-AS1	0.292391	5.33403	0.542036	-0.071638	5.33403	1	-0.364029	5.33403	0.473776
ATP1A2	-1.04174	1.56189	0.00019583	-0.472928	1.56189	0.478321	0.568814	1.56189	0.293709
ATP1A3	0.261368	1.75096	0.717659	0.197903	1.75096	0.996711	-0.0634649	1.75096	0.970039
ATP1A4	-0.384122	0.23413	0.642697	-0.0484297	0.23413	1	0.335692	0.23413	0.784836
ATP1B1	0.154639	4.1949	0.856683	0.164851	4.1949	1	0.0102117	4.1949	1
ATP1B2	0.205896	1.38768	0.827283	0.310564	1.38768	0.886835	0.104668	1.38768	0.947996
ATP1B3	0.288183	5.69135	0.55095	-0.373569	5.69135	0.566285	-0.661751	5.69135	0.0404631
ATP1B4	0.350333	0.0419248	0.715705	0.234944	0.0419248	1	-0.115389	0.0419248	0.95593
ATP23	0.00281433	4.6856	1	-0.328455	4.6856	0.710862	-0.331269	4.6856	0.566267
ATP2A1	-0.058216	0.778342	0.979852	0.160558	0.778342	1	0.218774	0.778342	0.870295
ATP2A1-AS1	-0.3643	-0.987763	0.8197	-0.660373	-0.987763	0.768339	-0.296073	-0.987763	0.906381
ATP2A2	0.295928	7.49197	0.523002	-0.159334	7.49197	1	-0.455262	7.49197	0.265926
ATP2A3	0.0900945	3.06048	0.944789	-0.0883494	3.06048	1	-0.178444	3.06048	0.859467
ATP2B1	0.069824	6.62724	0.958153	0.104783	6.62724	1	0.0349593	6.62724	0.984066
ATP2B2	0.205393	1.60686	0.81762	0.0247225	1.60686	1	-0.18067	1.60686	0.878884
ATP2B2-IT2	-0.193538	-2.3372	0.979605	-0.0122864	-2.3372	1	0.181252	-2.3372	0.983631
ATP2B3	-0.0847477	1.91312	0.954981	0.227423	1.91312	0.965552	0.312171	1.91312	0.684012
ATP2B4	0.144498	8.79223	0.863347	0.0608714	8.79223	1	-0.0836264	8.79223	0.946859
ATP2C1	0.12325	6.73157	0.896475	-0.0986996	6.73157	1	-0.22195	6.73157	0.767521
ATP2C2	-0.147188	0.621868	0.938336	1.45778	0.621868	0.000157768	1.60497	0.621868	1.79714e-05
ATP4A	-0.1578	0.34434	0.91381	0.0551903	0.34434	1	0.212991	0.34434	0.888454
ATP4B	-0.187124	-0.6439	0.922409	-0.0661309	-0.6439	1	0.120994	-0.6439	0.963366
ATP5A1	-0.163393	8.43248	0.828864	-0.476204	8.43248	0.280942	-0.312811	8.43248	0.582415
ATP5B	0.0673765	9.05029	0.961461	-0.485689	9.05029	0.258784	-0.553066	9.05029	0.118002
ATP5C1	0.00181203	6.66168	1	-0.306218	6.66168	0.747425	-0.30803	6.66168	0.597883
ATP5D	-0.0092511	5.51012	1	-0.302517	5.51012	0.763095	-0.293266	5.51012	0.639536
ATP5E	-0.00487272	6.22112	1	-0.171105	6.22112	0.992454	-0.166232	6.22112	0.85711
ATP5EP2	-0.00572083	6.22	1	-0.171582	6.22	0.992362	-0.165861	6.22	0.85769
ATP5F1	-0.0657125	6.08862	0.963213	-0.314503	6.08862	0.725983	-0.248791	6.08862	0.726444
ATP5G1	0.136599	4.67607	0.881508	-0.243363	4.67607	0.90341	-0.379962	4.67607	0.453458
ATP5G2	-0.115989	5.59215	0.907363	-0.00829637	5.59215	1	0.107693	5.59215	0.925725
ATP5G3	0.195607	5.63383	0.769729	-0.131491	5.63383	1	-0.327098	5.63383	0.564352
ATP5H	0.0348457	6.32051	0.986478	-0.299176	6.32051	0.769691	-0.334022	6.32051	0.541999
ATP5I	-0.00141352	5.8908	1	-0.293442	5.8908	0.786327	-0.292028	5.8908	0.637172
ATP5J	0.102693	4.86717	0.922409	-0.0362008	4.86717	1	-0.138894	4.86717	0.893151
ATP5J2	0.0264973	7.04551	0.991901	-0.212713	7.04551	0.94601	-0.23921	7.04551	0.737713
ATP5J2-PTCD1	0.107658	4.9752	0.915992	-0.239691	4.9752	0.90611	-0.347349	4.9752	0.51908
ATP5L	0.180611	5.2871	0.803933	-0.322391	5.2871	0.712757	-0.503002	5.2871	0.204302
ATP5L2	0.11724	5.68899	0.906502	-0.237924	5.68899	0.90626	-0.355164	5.68899	0.501103
ATP5O	0.066958	6.4115	0.962531	-0.283108	6.4115	0.812389	-0.350066	6.4115	0.499899
ATP5S	-0.353104	2.07757	0.511911	-0.0488318	2.07757	1	0.304272	2.07757	0.701222
ATP5SL	0.253263	5.15128	0.654346	0.115723	5.15128	1	-0.13754	5.15128	0.893408
ATP6AP1	0.321714	6.08664	0.46095	0.0562906	6.08664	1	-0.265423	6.08664	0.691747
ATP6AP1L	-0.131823	1.16454	0.922409	0.168882	1.16454	1	0.300705	1.16454	0.761394
ATP6AP2	0.32914	6.0777	0.441892	0.112392	6.0777	1	-0.216749	6.0777	0.775454
ATP6V0A1	0.228629	6.28061	0.703851	0.105188	6.28061	1	-0.123441	6.28061	0.90879
ATP6V0A2	0.0882	4.53894	0.940533	-0.0386773	4.53894	1	-0.126877	4.53894	0.907558
ATP6V0A4	-0.403336	-0.0269528	0.758496	1.96137	-0.0269528	3.07398e-07	2.3647	-0.0269528	3.68127e-09
ATP6V0B	0.111378	4.88317	0.911946	-0.0766978	4.88317	1	-0.188075	4.88317	0.829804
ATP6V0C	0.174533	5.66953	0.813588	-0.156178	5.66953	1	-0.33071	5.66953	0.554206
ATP6V0CP3	-0.334938	-1.94523	0.916743	0.00740895	-1.94523	1	0.342347	-1.94523	0.927866
ATP6V0D1	0.27762	6.0776	0.575677	-0.172261	6.0776	0.991833	-0.449881	6.0776	0.29058
ATP6V0D2	0.379495	1.25294	0.52023	0.166232	1.25294	1	-0.213262	1.25294	0.86068
ATP6V0E1	0.293666	5.83419	0.535638	-0.163963	5.83419	0.999399	-0.457629	5.83419	0.269833
ATP6V0E2	-0.0760519	4.58351	0.953166	-0.116729	4.58351	1	-0.0406774	4.58351	0.98105
ATP6V0E2-AS1	-0.356717	0.856737	0.612546	-0.0902334	0.856737	1	0.266484	0.856737	0.818047
PPBP	2.48701	2.69539	4.11919e-27	0.898472	2.69539	0.0267689	-1.58854	2.69539	2.10489e-08
ATP6V1B1	-0.528386	2.14313	0.147825	-0.0489918	2.14313	1	0.479395	2.14313	0.375509
ATP6V1B1-AS1	0.651783	-1.50441	0.632793	0.260518	-1.50441	1	-0.391264	-1.50441	0.888454
ATP6V1B2	0.236208	5.69535	0.689447	-0.0991485	5.69535	1	-0.335357	5.69535	0.545046
ATP6V1C1	0.054625	5.92581	0.974285	0.0344452	5.92581	1	-0.0201798	5.92581	0.996953
ATP6V1C2	0.417525	5.50905	0.219255	0.106897	5.50905	1	-0.310628	5.50905	0.596139
ATP6V1D	0.298638	4.779	0.533061	0.0462624	4.779	1	-0.252375	4.779	0.727761
ATP6V1E1	0.273976	5.96183	0.590938	-0.190303	5.96183	0.974376	-0.464279	5.96183	0.26462
ATP6V1E2	0.310734	-0.93413	0.885884	1.19394	-0.93413	0.146585	0.883211	-0.93413	0.366534
ATP6V1F	0.346464	5.04654	0.400666	-0.0528112	5.04654	1	-0.399275	5.04654	0.411894
ATP6V1G1	0.0407268	5.39069	0.982515	0.0788146	5.39069	1	0.0380878	5.39069	0.982621
ATP6V1G2	0.669039	-0.229317	0.232178	0.582937	-0.229317	0.642849	-0.0861019	-0.229317	0.970473
ATP6V1G2-DDX39B	-0.0856795	6.19176	0.942002	0.00365774	6.19176	1	0.0893372	6.19176	0.942266
ATP6V1G3	0.201843	-2.06225	0.965279	-0.193593	-2.06225	1	-0.395435	-2.06225	0.924871
ATP6V1H	0.196589	5.37179	0.76936	-0.178611	5.37179	0.987421	-0.3752	5.37179	0.455926
ATP7A	0.00922688	5.10953	1	0.149424	5.10953	1	0.140197	5.10953	0.890292
ATP7B	0.031758	3.84312	0.989732	0.309211	3.84312	0.769691	0.277453	3.84312	0.688234
ATP8A1	-0.15448	4.36825	0.855979	0.037842	4.36825	1	0.192322	4.36825	0.827067
ATP8A2	0.924967	2.74179	0.000342842	0.940371	2.74179	0.00386348	0.0154038	2.74179	0.999783
ATP8B1	0.0888569	5.89543	0.938252	0.275077	5.89543	0.820809	0.18622	5.89543	0.825802
ATP8B2	-0.103314	6.76186	0.920619	0.0754237	6.76186	1	0.178738	6.76186	0.833719
ATP8B3	0.361365	1.77965	0.503436	0.33842	1.77965	0.812953	-0.0229449	1.77965	0.997566
ATP8B4	0.0606289	3.46124	0.971656	-0.33192	3.46124	0.720338	-0.392549	3.46124	0.466115
ATP8B5P	0.126763	5.79018	0.893241	0.0231958	5.79018	1	-0.103567	5.79018	0.930301
ATP9A	0.214029	6.42996	0.737256	0.345301	6.42996	0.634763	0.131271	6.42996	0.900409
ATP9B	-0.0218475	5.81051	0.994871	0.182899	5.81051	0.979373	0.204746	5.81051	0.795999
ATPAF1	-0.132585	4.63374	0.889334	-0.253113	4.63374	0.887662	-0.120528	4.63374	0.916709
ATPAF2	0.0176713	3.5943	0.997569	-0.446512	3.5943	0.425197	-0.464183	3.5943	0.313052
ATPIF1	0.101373	5.16523	0.923354	0.0353778	5.16523	1	-0.0659952	5.16523	0.962096
ATR	0.089698	5.78983	0.936551	0.0371656	5.78983	1	-0.0525324	5.78983	0.970405
ATRAID	0.138766	4.97412	0.877356	-0.0105945	4.97412	1	-0.14936	4.97412	0.880771
ATRIP	-0.168352	3.06863	0.843781	-0.0206056	3.06863	1	0.147746	3.06863	0.893897
ATRN	0.22955	6.69864	0.700321	-0.0106206	6.69864	1	-0.240171	6.69864	0.737993
ATRNL1	0.24508	4.55882	0.684647	0.580856	4.55882	0.122979	0.335776	4.55882	0.535416
ATRX	-0.161207	7.61278	0.831884	-0.034337	7.61278	1	0.12687	7.61278	0.901602
ATXN1	-0.414739	6.01501	0.224137	-0.0870406	6.01501	1	0.327699	6.01501	0.553357
ATXN10	0.0283732	5.67871	0.990758	0.0492698	5.67871	1	0.0208966	5.67871	0.99607
ATXN1L	0.271882	6.99078	0.588771	0.0506676	6.99078	1	-0.221215	6.99078	0.769507
ATXN2	-0.14074	5.81699	0.871812	0.0471047	5.81699	1	0.187845	5.81699	0.824749
ATXN2L	-0.130347	5.57503	0.888043	0.0566278	5.57503	1	0.186974	5.57503	0.827735
ATXN3	-0.0315559	5.6662	0.98869	0.0072683	5.6662	1	0.0388242	5.6662	0.981178
ATXN3L	-0.647611	1.50221	0.355447	-1.05492	1.50221	0.0888412	-0.407308	1.50221	0.770601
ATXN7	-0.0166996	5.67004	0.997569	-0.0477742	5.67004	1	-0.0310746	5.67004	0.988961
ATXN7L1	-0.208458	4.26461	0.75207	-0.0665642	4.26461	1	0.141893	4.26461	0.890292
ATXN7L2	-0.126833	1.59026	0.916743	-0.125315	1.59026	1	0.00151784	1.59026	1
ATXN7L3	-0.103132	5.0314	0.922054	-0.0903766	5.0314	1	0.0127556	5.0314	0.999837
ATXN7L3B	-0.0938587	6.36337	0.932141	-9.71993e-05	6.36337	1	0.0937615	6.36337	0.938552
ATXN8OS	-0.372733	-1.8545	0.885093	-0.423368	-1.8545	1	-0.0506342	-1.8545	0.999783
AUH	-0.180311	4.2696	0.812671	0.00470736	4.2696	1	0.185018	4.2696	0.834586
AUNIP	0.174894	3.35766	0.827641	-0.0227818	3.35766	1	-0.197675	3.35766	0.829012
AUP1	0.025876	5.99741	0.992653	-0.113778	5.99741	1	-0.139654	5.99741	0.888454
AURKA	0.0893193	1.21673	0.956593	-0.501205	1.21673	0.535912	-0.590524	1.21673	0.286956
AURKAIP1	0.0527518	4.51541	0.974726	-0.241092	4.51541	0.908965	-0.293844	4.51541	0.646267
AURKAPS1	-0.0599213	2.43976	0.974285	-0.318808	2.43976	0.813827	-0.258886	2.43976	0.762037
AURKB	-0.0146833	1.00364	1	0.141905	1.00364	1	0.156588	1.00364	0.913737
AURKC	-0.20135	-0.106675	0.90208	0.124375	-0.106675	1	0.325726	-0.106675	0.824358
AUTS2	-0.242234	5.60425	0.67813	0.246795	5.60425	0.891083	0.489028	5.60425	0.214811
AVEN	0.185893	3.13174	0.812709	-0.159529	3.13174	1	-0.345422	3.13174	0.576596
AVIL	-0.229741	2.78533	0.740448	-0.234133	2.78533	0.943474	-0.0043917	2.78533	1
AVL9	0.0511128	5.26681	0.97535	0.0460274	5.26681	1	-0.00508534	5.26681	1
AVP	0.252537	-1.5375	0.923737	0.264288	-1.5375	1	0.0117504	-1.5375	1
AVPI1	0.148712	4.37474	0.865095	0.0496015	4.37474	1	-0.0991107	4.37474	0.937736
AVPR1A	-0.0652695	4.44653	0.96463	-0.344705	4.44653	0.659454	-0.279436	4.44653	0.678341
AVPR1B	-0.622164	-0.951195	0.492815	-0.402508	-0.951195	0.96279	0.219656	-0.951195	0.934743
AVPR2	-0.0228874	1.99974	0.995176	-0.325368	1.99974	0.828044	-0.302481	1.99974	0.718909
AWAT1	0.350928	-0.946511	0.827641	-0.478054	-0.946511	0.962731	-0.828982	-0.946511	0.49164
AWAT2	0.684861	-0.354956	0.259519	0.158367	-0.354956	1	-0.526494	-0.354956	0.628971
AXDND1	0.172529	0.258708	0.908667	0.136398	0.258708	1	-0.0361315	0.258708	0.994137
AXIN1	-0.126027	4.53818	0.896554	0.0226657	4.53818	1	0.148693	4.53818	0.881106
AXIN2	0.0166929	4.44771	0.997674	0.48214	4.44771	0.306544	0.465447	4.44771	0.253578
AXL	-0.102653	7.83777	0.921559	0.206924	7.83777	0.953345	0.309578	7.83777	0.570697
AZGP1	-3.66928	4.90104	5.89447e-21	1.6067	4.90104	0.00024936	5.27598	4.90104	3.01684e-31
AZGP1P1	-0.151885	-0.981746	0.963213	1.46763	-0.981746	0.0121155	1.61952	-0.981746	0.00469774
AZI2	0.247075	5.89253	0.66479	0.220121	5.89253	0.934299	-0.0269538	5.89253	0.991873
AZIN1	0.100745	6.82777	0.922409	0.164061	6.82777	0.997407	0.0633151	6.82777	0.962619
AZIN1-AS1	-0.498897	-1.61358	0.78961	0.170443	-1.61358	1	0.66934	-1.61358	0.724046
AZIN2	-0.653726	2.07658	0.0356472	-0.353855	2.07658	0.752176	0.299871	2.07658	0.707333
AZU1	-0.179402	-0.390389	0.919371	-0.402351	-0.390389	0.937541	-0.222949	-0.390389	0.914975
B2M	0.343374	10.8614	0.388863	-0.0758206	10.8614	1	-0.419195	10.8614	0.351449
B3GALNT1	-0.217507	4.01612	0.740985	-0.0436195	4.01612	1	0.173887	4.01612	0.856562
B3GALNT2	-0.0974952	5.18483	0.928397	-0.160967	5.18483	1	-0.0634721	5.18483	0.96295
B3GALT1	0.674657	-0.17685	0.241194	0.499614	-0.17685	0.795064	-0.175044	-0.17685	0.92884
B3GALT2	-0.144868	2.81663	0.883613	-0.0724697	2.81663	1	0.0723985	2.81663	0.962096
B3GALT4	-0.169806	4.2381	0.827641	-0.203775	4.2381	0.965552	-0.0339682	4.2381	0.98661
B3GALT5	0.0386804	0.0790691	0.993476	0.331107	0.0790691	0.948891	0.292426	0.0790691	0.830027
B3GALT5-AS1	0.611164	-1.4302	0.649184	0.282363	-1.4302	1	-0.328801	-1.4302	0.897766
B3GALT6	-0.0885181	2.92947	0.947077	-0.121352	2.92947	1	-0.0328336	2.92947	0.989875
B3GAT1	-0.15304	0.890271	0.937181	2.2827	0.890271	3.0113e-11	2.43574	0.890271	6.46102e-12
B3GAT2	-0.271316	0.956814	0.744854	-0.457694	0.956814	0.656158	-0.186378	0.956814	0.896607
B3GAT3	0.0241817	3.76628	0.994192	-0.149546	3.76628	1	-0.173727	3.76628	0.857444
B3GLCT	0.692015	5.03582	0.00494984	0.448945	5.03582	0.359434	-0.24307	5.03582	0.73651
B3GNT2	0.20688	4.7765	0.751103	-0.00752615	4.7765	1	-0.214406	4.7765	0.787218
B3GNT3	0.567705	0.749049	0.221411	0.555722	0.749049	0.485233	-0.0119826	0.749049	1
B3GNT4	-0.302861	0.0916671	0.782023	0.154205	0.0916671	1	0.457066	0.0916671	0.666126
B3GNT5	-0.597753	2.60052	0.0576346	-0.192747	2.60052	0.9896	0.405006	2.60052	0.471892
B3GNT6	0.415985	1.31809	0.434915	0.398088	1.31809	0.730285	-0.0178962	1.31809	0.999783
B3GNT7	-0.419229	0.580819	0.531318	-0.133061	0.580819	1	0.286168	0.580819	0.806429
B3GNT8	0.270965	1.94482	0.690951	0.377294	1.94482	0.688176	0.106329	1.94482	0.941298
B3GNT9	-0.241027	4.31159	0.689993	-0.0242975	4.31159	1	0.216729	4.31159	0.782917
B3GNTL1	-0.230746	3.33824	0.728083	-0.0219339	3.33824	1	0.208812	3.33824	0.813216
B4GALNT1	-0.554261	0.951599	0.241638	0.0069975	0.951599	1	0.561259	0.951599	0.375428
B4GALNT2	-0.264057	0.0623112	0.863851	1.61413	0.0623112	5.3605e-05	1.87818	0.0623112	2.64753e-06
B4GALNT3	0.586045	0.576297	0.238823	1.06487	0.576297	0.0116265	0.478825	0.576297	0.506967
B4GALNT4	0.338042	0.521822	0.690913	0.791993	0.521822	0.136791	0.453951	0.521822	0.561847
B4GALT1	-0.0911974	6.30374	0.934955	-0.0108823	6.30374	1	0.0803151	6.30374	0.9502
B4GALT1-AS1	0.00220838	-1.76254	1	-0.29587	-1.76254	1	-0.298078	-1.76254	0.94
B4GALT2	-0.120522	4.58341	0.903315	-0.293837	4.58341	0.800922	-0.173315	4.58341	0.851143
B4GALT3	-0.124262	4.19384	0.90031	0.023585	4.19384	1	0.147847	4.19384	0.885775
B4GALT4	-0.330112	2.80466	0.513237	0.00134016	2.80466	1	0.331452	2.80466	0.609056
B4GALT4-AS1	-0.418616	-0.362512	0.68313	-0.127476	-0.362512	1	0.29114	-0.362512	0.872904
B4GALT5	-0.0208012	5.52601	0.994871	-0.0691436	5.52601	1	-0.0483424	5.52601	0.975003
B4GALT6	0.878679	2.08193	0.0017417	0.704371	2.08193	0.114733	-0.174307	2.08193	0.88251
B4GALT7	0.016635	3.97084	0.997674	-0.241721	3.97084	0.912335	-0.258356	3.97084	0.726743
B4GAT1	0.263253	3.77723	0.648024	0.134332	3.77723	1	-0.128921	3.77723	0.908602
B9D1	0.0369863	4.12521	0.985839	0.0747822	4.12521	1	0.0377959	4.12521	0.98321
B9D2	-0.062197	2.01366	0.974285	-0.0165418	2.01366	1	0.0456551	2.01366	0.98105
BAALC	0.275937	1.16786	0.73005	0.0292866	1.16786	1	-0.24665	1.16786	0.825266
BAALC-AS1	0.259867	-1.71494	0.93306	-0.412113	-1.71494	1	-0.67198	-1.71494	0.783618
BAALC-AS2	1.20496	-2.23132	0.488967	0.884759	-2.23132	0.936538	-0.320201	-2.23132	0.942291
BAAT	0.167816	0.936662	0.887894	-0.482738	0.936662	0.625126	-0.650555	0.936662	0.246619
BABAM1	0.048859	5.02081	0.976774	-0.0194095	5.02081	1	-0.0682685	5.02081	0.960706
BACE1	-0.0548512	6.40755	0.974193	-0.0142829	6.40755	1	0.0405683	6.40755	0.980565
BACE1-AS	-0.197034	1.87363	0.82339	-0.185791	1.87363	1	0.0112437	1.87363	1
BACE2	-0.117964	5.97605	0.903986	-0.0811348	5.97605	1	0.0368296	5.97605	0.983156
BACH1	-0.100288	6.22566	0.923452	0.131584	6.22566	1	0.231872	6.22566	0.748563
BACH1-IT2	-0.0661631	-1.18568	0.991645	0.519693	-1.18568	0.919617	0.585856	-1.18568	0.721298
BACH2	-0.491356	3.81707	0.128123	0.137024	3.81707	1	0.62838	3.81707	0.0682009
BAD	0.0787266	3.76688	0.952415	-0.0828782	3.76688	1	-0.161605	3.76688	0.872169
BAG1	-0.0241223	4.869	0.993672	-0.0140391	4.869	1	0.0100832	4.869	1
BAG2	-0.221816	3.95174	0.736185	-0.0487736	3.95174	1	0.173042	3.95174	0.853371
BAG3	0.334942	4.28069	0.447288	0.0685917	4.28069	1	-0.26635	4.28069	0.701222
BAG4	-0.0888295	4.70756	0.939613	0.0961894	4.70756	1	0.185019	4.70756	0.833719
BAG5	0.104746	5.93796	0.918366	0.0654632	5.93796	1	-0.039283	5.93796	0.98105
BAG6	-0.0621897	6.54649	0.966333	0.0938201	6.54649	1	0.15601	6.54649	0.869341
BAGE	-0.234429	3.08921	0.728393	0.0411327	3.08921	1	0.275561	3.08921	0.710111
BAGE2	-0.155158	5.56797	0.847784	0.0697328	5.56797	1	0.224891	5.56797	0.764496
BAGE3	-0.155158	5.56797	0.847784	0.0697328	5.56797	1	0.224891	5.56797	0.764496
BAGE4	-0.152902	5.54916	0.852345	0.0733652	5.54916	1	0.226268	5.54916	0.762101
BAGE5	-0.152902	5.54916	0.852345	0.0733652	5.54916	1	0.226268	5.54916	0.762101
BAHCC1	-0.197787	4.22943	0.776066	0.235118	4.22943	0.914392	0.432906	4.22943	0.350602
BAHD1	-0.195761	4.32664	0.778058	-0.0466848	4.32664	1	0.149076	4.32664	0.883092
BAIAP2	-0.076324	4.19614	0.953413	-0.0228337	4.19614	1	0.0534903	4.19614	0.971317
BAIAP2-AS1	-0.0206736	2.93131	0.996253	0.0187136	2.93131	1	0.0393872	2.93131	0.984066
BAIAP2L1	0.210013	2.64709	0.786984	0.813504	2.64709	0.0161496	0.603491	2.64709	0.131888
BAIAP2L2	-0.187059	0.433112	0.889129	0.113771	0.433112	1	0.300829	0.433112	0.800849
BAIAP3	0.266618	1.84747	0.707489	0.108889	1.84747	1	-0.157729	1.84747	0.898312
BAK1	0.110093	3.83307	0.916743	-0.207605	3.83307	0.963523	-0.317698	3.83307	0.610983
BAMBI	-0.39317	-0.194157	0.728393	0.878177	-0.194157	0.141295	1.27135	-0.194157	0.00806229
BANF1	0.0632401	5.05121	0.966042	-0.0756249	5.05121	1	-0.138865	5.05121	0.891908
BANF2	-0.0386683	-2.04346	0.998411	-1.53829	-2.04346	0.464175	-1.49962	-2.04346	0.423689
BANK1	0.501424	4.53959	0.107239	0.0966531	4.53959	1	-0.404771	4.53959	0.427754
BANP	-0.199421	3.79561	0.776286	-0.0126759	3.79561	1	0.186745	3.79561	0.834616
BAP1	-0.122796	5.99322	0.898742	-0.215367	5.99322	0.943027	-0.0925711	5.99322	0.941299
BARD1	-0.162924	2.34777	0.866659	0.0326018	2.34777	1	0.195526	2.34777	0.851173
BARHL1	0.0370042	0.592661	0.991743	-0.547632	0.592661	0.573977	-0.584636	0.592661	0.41232
BARHL2	0.0250891	-1.69933	1	0.187693	-1.69933	1	0.162604	-1.69933	0.965894
BARX1	0.187266	1.10397	0.865327	0.482488	1.10397	0.558547	0.295222	1.10397	0.756845
BARX2	0.34642	-0.620551	0.827015	1.25556	-0.620551	0.0337774	0.909141	-0.620551	0.206227
BASP1	-0.46331	5.17826	0.153578	-0.0683076	5.17826	1	0.395003	5.17826	0.413688
BASP1P1	-0.461599	4.58151	0.160746	-0.0509844	4.58151	1	0.410615	4.58151	0.386868
BATF	0.889111	0.668786	0.00891882	0.231356	0.668786	1	-0.657756	0.668786	0.258308
BATF2	0.0788683	0.979178	0.970576	0.54823	0.979178	0.430691	0.469361	0.979178	0.494634
BATF3	0.557946	0.791583	0.218519	0.115765	0.791583	1	-0.442181	0.791583	0.566534
BAX	0.0841813	3.16091	0.950583	-0.270794	3.16091	0.878851	-0.354975	3.16091	0.545473
BAZ1A	0.187645	5.73845	0.787057	-0.133624	5.73845	1	-0.321269	5.73845	0.573279
BAZ1B	0.0738302	7.00013	0.953344	0.0571801	7.00013	1	-0.0166501	7.00013	0.999349
BAZ2A	-0.155985	6.75927	0.843309	-0.0111751	6.75927	1	0.14481	6.75927	0.88232
BAZ2B	-0.307243	6.70417	0.498274	0.00254812	6.70417	1	0.309791	6.70417	0.582504
BBC3	0.00325703	3.23913	1	-0.395205	3.23913	0.572808	-0.398462	3.23913	0.46211
BBIP1	-0.0605879	4.22961	0.970576	0.0953801	4.22961	1	0.155968	4.22961	0.875444
BBOF1	-0.364506	4.46083	0.36319	-0.240758	4.46083	0.907595	0.123748	4.46083	0.910694
BBOX1	0.378302	0.156975	0.66736	-0.103466	0.156975	1	-0.481768	0.156975	0.621057
BBOX1-AS1	-0.134222	-1.68625	0.976159	0.179903	-1.68625	1	0.314125	-1.68625	0.930062
BBS1	-0.0676903	4.2492	0.963213	0.353701	4.2492	0.633414	0.421391	4.2492	0.359996
BBS10	-0.148056	3.62515	0.871273	-0.00888128	3.62515	1	0.139175	3.62515	0.898312
BBS12	-0.308771	3.2202	0.549271	0.191418	3.2202	0.984131	0.500189	3.2202	0.250752
BBS2	-0.0631711	3.32509	0.969915	0.0121993	3.32509	1	0.0753704	3.32509	0.957926
BBS4	-0.0977659	3.72252	0.932743	0.12449	3.72252	1	0.222256	3.72252	0.783702
BBS5	0.357307	3.04417	0.430841	0.0970749	3.04417	1	-0.260232	3.04417	0.738242
BBS7	0.0401748	4.50824	0.983357	0.0337427	4.50824	1	-0.00643211	4.50824	1
BBS9	-0.0111082	4.17983	1	0.122127	4.17983	1	0.133236	4.17983	0.900633
BBX	0.0946699	6.51125	0.930546	0.237015	6.51125	0.902454	0.142345	6.51125	0.884324
BCAM	-0.229449	4.88949	0.711341	-0.152013	4.88949	1	0.0774355	4.88949	0.954475
BCAN	-0.0410848	-0.00748406	0.992653	0.0147255	-0.00748406	1	0.0558103	-0.00748406	0.98661
BCAP29	0.389459	5.60585	0.282131	0.0799325	5.60585	1	-0.309527	5.60585	0.599221
BCAP31	0.310973	6.11937	0.490837	-0.0507391	6.11937	1	-0.361712	6.11937	0.47927
BCAR1	-0.17475	4.45919	0.819362	-0.216028	4.45919	0.948342	-0.0412782	4.45919	0.980757
BCAR3	0.0933719	5.01309	0.933697	-0.193068	5.01309	0.973225	-0.28644	5.01309	0.659195
BCAR4	0.63559	-1.12878	0.561003	0.761219	-1.12878	0.64643	0.12563	-1.12878	0.965894
BCAS1	-0.386307	0.808193	0.631708	1.18135	0.808193	0.00178324	1.56766	0.808193	1.43842e-05
BCAS2	0.135565	4.24111	0.884818	0.125826	4.24111	1	-0.00973941	4.24111	1
BCAS3	-0.109054	4.95441	0.914387	-0.0941339	4.95441	1	0.0149205	4.95441	0.999783
BCAS4	0.169276	1.14938	0.885298	0.268098	1.14938	0.949367	0.0988225	1.14938	0.952763
BCAT1	-0.0560911	6.74465	0.97338	-0.0680401	6.74465	1	-0.011949	6.74465	1
BCAT2	-0.272826	3.86749	0.631262	0.111287	3.86749	1	0.384113	3.86749	0.451596
BCCIP	0.110358	5.94608	0.911986	-0.0978573	5.94608	1	-0.208215	5.94608	0.793156
BCDIN3D	-0.112244	3.70062	0.91471	0.0452827	3.70062	1	0.157527	3.70062	0.87573
BCDIN3D-AS1	-0.00704704	2.48963	1	0.147436	2.48963	1	0.154483	2.48963	0.891433
BCHE	-0.545176	3.8108	0.0693802	-0.167886	3.8108	1	0.37729	3.8108	0.49164
BCKDHA	-0.343001	4.96362	0.421322	-0.165098	4.96362	0.999999	0.177903	4.96362	0.844012
BCKDHB	-0.252933	3.13813	0.690951	-0.289829	3.13813	0.84258	-0.0368967	3.13813	0.985393
BCKDK	0.0710754	5.42135	0.95783	-0.236054	5.42135	0.911124	-0.30713	5.42135	0.607225
BCL10	-0.0571733	3.4925	0.974285	0.185377	3.4925	0.987059	0.24255	3.4925	0.754846
BCL11A	-0.242556	1.51491	0.761105	-0.0889519	1.51491	1	0.153604	1.51491	0.910874
BCL11B	-0.234284	2.34282	0.74214	-0.0254265	2.34282	1	0.208857	2.34282	0.830252
BCL2	-0.0130019	7.00564	0.998475	0.0503947	7.00564	1	0.0633965	7.00564	0.962888
PF4V1	2.39954	-0.526759	1.74367e-09	0.617242	-0.526759	0.830393	-1.7823	-0.526759	0.000110838
BCL2L1	0.209545	5.04689	0.744832	0.0498021	5.04689	1	-0.159743	5.04689	0.869341
BCL2L10	-0.0291603	-0.575559	0.997674	0.221321	-0.575559	1	0.250481	-0.575559	0.900149
BCL2L11	-0.341831	4.65064	0.424507	-0.00457772	4.65064	1	0.337253	4.65064	0.545473
BCL2L12	-0.0639381	3.26392	0.969189	-0.0391825	3.26392	1	0.0247556	3.26392	0.993027
BCL2L13	0.124244	6.3486	0.896475	0.00414946	6.3486	1	-0.120094	6.3486	0.91315
BCL2L14	0.240219	-0.0218362	0.859444	0.620392	-0.0218362	0.520624	0.380173	-0.0218362	0.746021
BCL2L15	0.825101	-0.206489	0.0850751	0.304085	-0.206489	0.9896	-0.521017	-0.206489	0.581215
BCL2L2	0.261043	6.79902	0.625123	-0.0557745	6.79902	1	-0.316817	6.79902	0.583575
BCL2L2-PABPN1	0.0504019	6.25858	0.975558	-0.0749695	6.25858	1	-0.125371	6.25858	0.905451
BCL3	-0.00747704	3.56185	1	-0.0238671	3.56185	1	-0.0163901	3.56185	0.99968
BCL6	-0.0213199	6.5753	0.994871	-0.170734	6.5753	0.993451	-0.149414	6.5753	0.877888
BCL6B	-0.729145	4.63785	0.00315506	-0.579517	4.63785	0.125921	0.149628	4.63785	0.885969
BCL7A	0.034218	3.41764	0.988042	0.244351	3.41764	0.912149	0.210133	3.41764	0.805163
OR8J3	2.39672	-2.1678	0.00657237	-0.254181	-2.1678	1	-2.6509	-2.1678	0.0268584
BCL7C	-0.128727	5.06789	0.892254	0.0622631	5.06789	1	0.19099	5.06789	0.82149
BCL9	-0.32411	3.96175	0.488967	0.17511	3.96175	0.993193	0.499219	3.96175	0.214777
BCL9L	-0.316522	5.48599	0.481633	-0.0164833	5.48599	1	0.300039	5.48599	0.62266
BCLAF1	-0.0429534	7.16459	0.979605	0.0369371	7.16459	1	0.0798905	7.16459	0.950262
BCO1	-0.272318	0.608075	0.773176	0.05058	0.608075	1	0.322898	0.608075	0.764843
BCO2	0.26012	2.32262	0.700974	0.217807	2.32262	0.970288	-0.0423129	2.32262	0.982621
BCOR	0.000661033	4.31474	1	0.0484584	4.31474	1	0.0477974	4.31474	0.976595
BCORL1	-0.278446	4.30751	0.593567	0.115284	4.30751	1	0.39373	4.30751	0.41968
BCORP1	-0.927882	-0.837357	0.161132	0.114887	-0.837357	1	1.04277	-0.837357	0.202723
BCR	-0.0465172	5.60342	0.978303	-5.78961e-05	5.60342	1	0.0464593	5.60342	0.976559
BCRP2	0.0675918	3.60358	0.964471	0.067369	3.60358	1	-0.000222824	3.60358	1
BCRP3	0.0820586	3.42393	0.952141	0.0862916	3.42393	1	0.00423302	3.42393	1
BCS1L	0.0099439	3.73272	1	-0.0500113	3.73272	1	-0.0599552	3.73272	0.96667
BCYRN1	0.0839228	-2.13611	0.994871	0.665277	-2.13611	0.979373	0.581354	-2.13611	0.866989
BDH1	-0.342483	3.47428	0.463679	-0.264374	3.47428	0.884026	0.0781091	3.47428	0.956973
BDH2	-0.0227393	4.30468	0.994871	0.183506	4.30468	0.985599	0.206245	4.30468	0.799374
BDKRB1	-0.511902	0.991956	0.276336	-0.708408	0.991956	0.159084	-0.196506	0.991956	0.886577
BDKRB2	0.481673	2.15359	0.215036	0.444517	2.15359	0.522176	-0.037156	2.15359	0.986446
BDNF	-0.538745	1.14869	0.221328	-0.203787	1.14869	1	0.334958	1.14869	0.719508
BDNF-AS	-0.360035	-0.172836	0.731906	-0.12086	-0.172836	1	0.239175	-0.172836	0.894806
BDP1	-0.0924991	6.94787	0.933104	-0.0663242	6.94787	1	0.0261749	6.94787	0.991998
BEAN1	0.193945	0.915683	0.859444	-0.143116	0.915683	1	-0.337061	0.915683	0.731864
BEAN1-AS1	-0.217134	-2.56454	0.980039	-0.0427968	-2.56454	1	0.174337	-2.56454	0.989354
BECN1	0.208447	6.00789	0.743294	-0.0380644	6.00789	1	-0.246511	6.00789	0.729282
BECN2	0.370448	-1.13935	0.824383	0.260339	-1.13935	1	-0.110109	-1.13935	0.976274
BEGAIN	0.000930557	0.693123	1	0.134338	0.693123	1	0.133407	0.693123	0.941763
BEND2	0.120852	0.336357	0.948719	0.233617	0.336357	1	0.112765	0.336357	0.954837
BEND3	0.303624	2.79734	0.570361	0.259446	2.79734	0.904223	-0.0441782	2.79734	0.980757
BEND3P3	-0.144729	1.33353	0.908102	0.0557286	1.33353	1	0.200457	1.33353	0.87075
BEND4	-0.263756	2.77533	0.681682	0.383891	2.77533	0.601039	0.647647	2.77533	0.076248
BEND5	-0.319461	1.62983	0.632793	0.617413	1.62983	0.189592	0.936874	1.62983	0.00688487
BEND6	-0.281673	1.77679	0.678391	-0.238792	1.77679	0.962959	0.0428806	1.77679	0.984066
BEND7	0.106715	3.05599	0.925955	0.299999	3.05599	0.82023	0.193284	3.05599	0.834705
BEST1	0.208601	1.68033	0.811738	0.240958	1.68033	0.961031	0.0323573	1.68033	0.991873
BEST2	0.0227193	-0.865815	0.999135	-0.918845	-0.865815	0.468915	-0.941564	-0.865815	0.362739
BEST3	-0.0113085	0.0111445	1	-0.660756	0.0111445	0.485686	-0.649448	0.0111445	0.422026
BEST4	0.119955	0.691911	0.940556	0.523382	0.691911	0.536811	0.403427	0.691911	0.631558
BET1	0.103275	3.79859	0.924769	-0.0139815	3.79859	1	-0.117256	3.79859	0.92
BET1L	-0.183648	5.06796	0.798308	-0.00994635	5.06796	1	0.173702	5.06796	0.848071
BEX1	0.759547	0.606765	0.0703424	1.01798	0.606765	0.0240696	0.258434	0.606765	0.829804
BEX2	0.266109	0.634693	0.783886	0.751189	0.634693	0.151428	0.48508	0.634693	0.495536
BEX3	0.147447	4.96941	0.863594	0.231583	4.96941	0.917494	0.0841359	4.96941	0.948398
BEX4	0.0572692	4.18283	0.974193	0.666211	4.18283	0.0498054	0.608942	4.18283	0.0681073
BEX5	-0.854501	-1.88774	0.555856	-0.550238	-1.88774	0.990908	0.304263	-1.88774	0.945657
BFAR	0.062515	5.40445	0.96674	-0.0312118	5.40445	1	-0.0937268	5.40445	0.941298
BFSP1	0.275096	-0.200421	0.828174	0.467257	-0.200421	0.826175	0.192161	-0.200421	0.919132
BFSP2	-0.444977	-0.537856	0.665733	-0.845691	-0.537856	0.417726	-0.400714	-0.537856	0.825266
BFSP2-AS1	-0.681004	-1.13793	0.502729	0.0305374	-1.13793	1	0.711541	-1.13793	0.642278
BGLAP	0.182867	-0.0933837	0.910394	0.0753485	-0.0933837	1	-0.107518	-0.0933837	0.96212
BGLT3	-0.870803	-2.10989	0.65466	-0.0580428	-2.10989	1	0.81276	-2.10989	0.739296
BGN	-0.932929	6.32623	5.28944e-05	-0.998061	6.32623	0.000664186	-0.0651312	6.32623	0.965466
BHLHA15	-0.0330288	-1.09988	0.99777	1.46134	-1.09988	0.0181645	1.49437	-1.09988	0.014994
BHLHA9	-0.00104864	-0.0147608	1	0.0770733	-0.0147608	1	0.0781219	-0.0147608	0.974745
BHLHB9	-0.178441	3.39591	0.823678	-0.00437131	3.39591	1	0.17407	3.39591	0.861968
BHLHE22	-0.455149	1.85844	0.285796	-0.184854	1.85844	1	0.270295	1.85844	0.762942
BHLHE23	0.62443	-0.576838	0.445428	0.892345	-0.576838	0.28837	0.267915	-0.576838	0.878884
BHLHE40	0.0637276	6.30626	0.965014	0.0262207	6.30626	1	-0.0375069	6.30626	0.982621
BHLHE40-AS1	-0.193032	2.07536	0.824266	0.0732186	2.07536	1	0.266251	2.07536	0.758667
BHLHE41	-0.238602	5.80898	0.684647	-0.550764	5.80898	0.160451	-0.312162	5.80898	0.600285
BHMG1	0.138994	0.440592	0.928634	0.0547245	0.440592	1	-0.0842699	0.440592	0.9661
BHMT	0.503456	0.340873	0.372851	-0.27621	0.340873	0.98864	-0.779666	0.340873	0.180706
CXCL1	2.37621	0.232745	1.1695e-13	1.12622	0.232745	0.0947129	-1.25	0.232745	0.00614613
BICC1	-0.419585	6.10262	0.215995	0.0206225	6.10262	1	0.440208	6.10262	0.298455
BICD1	-0.376624	3.05335	0.381146	-0.16291	3.05335	1	0.213714	3.05335	0.805163
BICD2	0.0277389	6.32973	0.991024	-0.113462	6.32973	1	-0.141201	6.32973	0.886815
BICDL1	-0.295105	1.8408	0.664253	0.55368	1.8408	0.292994	0.848786	1.8408	0.0180095
BICDL2	0.590845	2.59125	0.0837362	1.18165	2.59125	4.83553e-05	0.590806	2.59125	0.140534
BID	0.1276	3.83783	0.898452	0.0878999	3.83783	1	-0.0397001	3.83783	0.982178
BIK	0.210702	0.732977	0.851272	0.47562	0.732977	0.604547	0.264919	0.732977	0.80765
BIN1	-0.0698316	6.36541	0.958158	-0.135379	6.36541	1	-0.0655476	6.36541	0.961975
FRZB	2.32871	7.27085	2.77176e-30	1.56435	7.27085	1.38346e-09	-0.764357	7.27085	0.0110838
BIN3	-0.0653881	4.01565	0.965097	0.0125204	4.01565	1	0.0779086	4.01565	0.954053
BIN3-IT1	-0.00945879	0.486311	1	0.232714	0.486311	0.998434	0.242173	0.486311	0.854771
BIRC2	-0.047325	5.86487	0.977348	0.0198927	5.86487	1	0.0672177	5.86487	0.961117
BIRC3	0.34935	3.19043	0.452314	0.183081	3.19043	0.992362	-0.166269	3.19043	0.872723
BIRC5	0.713141	1.50207	0.0281742	0.0487955	1.50207	1	-0.664346	1.50207	0.157376
BIRC6	-0.0515375	8.50744	0.974633	-0.133895	8.50744	1	-0.082358	8.50744	0.948398
BIRC6-AS2	-0.209712	-0.201415	0.894393	-0.29105	-0.201415	0.996549	-0.0813373	-0.201415	0.977329
BIRC7	0.120973	0.576029	0.94819	0.397586	0.576029	0.862368	0.276613	0.576029	0.834691
BIRC8	-0.0420307	4.51753	0.981939	0.0209499	4.51753	1	0.0629806	4.51753	0.963366
BISPR	-0.712086	-0.415738	0.21988	-0.70819	-0.415738	0.464479	0.00389644	-0.415738	1
BIVM	-0.124982	5.13628	0.896476	-0.13532	5.13628	1	-0.0103383	5.13628	1
BIVM-ERCC5	-0.0576865	6.48705	0.971203	-0.026948	6.48705	1	0.0307385	6.48705	0.989354
BLACAT1	-0.69638	-1.1025	0.430354	-0.676729	-1.1025	0.787931	0.0196511	-1.1025	1
BLACE	0.442489	-1.40372	0.798314	0.325007	-1.40372	1	-0.117482	-1.40372	0.974328
BLCAP	0.388805	5.38164	0.285894	-0.0624904	5.38164	1	-0.451295	5.38164	0.296135
BLID	-0.338617	1.17404	0.60545	-0.205383	1.17404	1	0.133235	1.17404	0.934077
BLK	0.0471195	-0.738025	0.993402	0.101788	-0.738025	1	0.0546687	-0.738025	0.991719
BLM	0.0321377	4.91004	0.988519	0.112547	4.91004	1	0.0804092	4.91004	0.951244
BLMH	-0.0329205	5.55571	0.987354	-0.0121023	5.55571	1	0.0208182	5.55571	0.996297
BLNK	-0.139327	3.38431	0.884927	-0.198196	3.38431	0.975757	-0.0588688	3.38431	0.968431
BLOC1S1	0.0773048	5.52941	0.952181	0.102572	5.52941	1	0.0252674	5.52941	0.991998
BLOC1S1-RDH5	0.206445	5.83192	0.747475	-0.015913	5.83192	1	-0.222358	5.83192	0.769313
BLOC1S2	0.151341	4.35523	0.859444	-0.0526803	4.35523	1	-0.204022	4.35523	0.805163
BLOC1S3	-0.0179513	2.8772	0.997569	0.0570313	2.8772	1	0.0749826	2.8772	0.960118
BLOC1S4	0.0339336	2.75067	0.989125	0.0415747	2.75067	1	0.00764111	2.75067	1
BLOC1S5	0.0119047	3.73861	0.99961	0.115463	3.73861	1	0.103558	3.73861	0.935213
BLOC1S5-TXNDC5	-0.225748	7.0356	0.708348	-0.307848	7.0356	0.742529	-0.0821007	7.0356	0.948913
BLOC1S6	0.10425	4.89245	0.921449	0.0413389	4.89245	1	-0.0629114	4.89245	0.963366
BLVRA	0.0481441	5.0913	0.97711	0.0228685	5.0913	1	-0.0252755	5.0913	0.991998
BLVRB	-0.158905	5.22896	0.843904	0.00355345	5.22896	1	0.162459	5.22896	0.863611
BLZF1	0.164325	4.38872	0.836155	0.0195373	4.38872	1	-0.144788	4.38872	0.888454
BMF	-0.295065	4.74894	0.544481	0.408072	4.74894	0.473263	0.703137	4.74894	0.0231128
BMI1	0.0445925	5.71285	0.978942	0.0199132	5.71285	1	-0.0246793	5.71285	0.992116
BMP1	-0.633732	6.77878	0.0125843	-0.417967	6.77878	0.431755	0.215765	6.77878	0.777933
BMP10	0.453569	-0.82454	0.710125	0.594438	-0.82454	0.774357	0.140869	-0.82454	0.956845
BMP15	-0.0608104	-1.69758	0.994871	0.713298	-1.69758	0.8587	0.774109	-1.69758	0.672558
BMP2	0.595752	3.36699	0.0369713	0.249528	3.36699	0.906339	-0.346224	3.36699	0.563828
BMP2K	0.0586358	5.73927	0.970576	0.00766289	5.73927	1	-0.0509729	5.73927	0.971968
BMP3	-0.437502	1.42615	0.386828	0.026087	1.42615	1	0.463589	1.42615	0.450223
BMP4	0.0768429	4.06606	0.954561	0.0734878	4.06606	1	-0.00335507	4.06606	1
BMP5	1.09622	1.3605	0.0001973	0.767115	1.3605	0.114733	-0.329101	1.3605	0.703982
BMP6	0.0563393	4.30125	0.97424	-0.263743	4.30125	0.870111	-0.320083	4.30125	0.594646
BMP7	0.330669	4.17556	0.503436	0.719461	4.17556	0.03675	0.388792	4.17556	0.415463
BMP7-AS1	-0.689531	-1.42191	0.633721	0.0656758	-1.42191	1	0.755207	-1.42191	0.664215
BMP8A	-0.318932	2.66101	0.544481	-0.000612486	2.66101	1	0.318319	2.66101	0.640705
BMP8B	-0.123481	1.99167	0.915054	-0.363772	1.99167	0.742801	-0.240291	1.99167	0.802119
BMPER	-0.170365	3.47795	0.840518	-0.377023	3.47795	0.600249	-0.206659	3.47795	0.824395
BMPR1A	-0.101159	6.34783	0.922409	-0.0742737	6.34783	1	0.0268851	6.34783	0.991848
BMPR1B	-1.44815	1.54899	1.92979e-08	-0.959634	1.54899	0.00645298	0.488514	1.54899	0.441985
BMPR1B-AS1	0.652568	-2.80554	0.905409	-2.11865	-2.80554	0.758925	-2.77122	-2.80554	0.40428
BMPR2	0.054718	8.04496	0.974193	0.051229	8.04496	1	-0.00348902	8.04496	1
BMS1	-0.0148744	5.40481	0.997674	0.00771835	5.40481	1	0.0225927	5.40481	0.994128
BMS1P17	-0.091583	2.41043	0.947411	-0.134189	2.41043	1	-0.0426055	2.41043	0.982621
BMS1P18	-0.091583	2.41043	0.947411	-0.134189	2.41043	1	-0.0426055	2.41043	0.982621
BMS1P20	0.00428429	5.18834	1	0.0297643	5.18834	1	0.02548	5.18834	0.991998
BMS1P21	-0.16192	4.02471	0.843405	0.0298715	4.02471	1	0.191791	4.02471	0.829494
BMS1P22	-0.091583	2.41043	0.947411	-0.134189	2.41043	1	-0.0426055	2.41043	0.982621
BMS1P4	-0.150318	4.08198	0.863584	0.0790457	4.08198	1	0.229363	4.08198	0.768015
BMS1P5	-0.103627	3.90062	0.923675	-0.105783	3.90062	1	-0.00215615	3.90062	1
BMS1P6	-0.180031	3.54911	0.8197	0.178504	3.54911	0.992742	0.358536	3.54911	0.518681
BMT2	0.175974	3.75018	0.822152	-0.0060761	3.75018	1	-0.18205	3.75018	0.846591
BMX	0.149172	3.69186	0.869549	-0.128905	3.69186	1	-0.278078	3.69186	0.693762
BNC1	0.409396	0.109423	0.62736	0.613158	0.109423	0.515678	0.203762	0.109423	0.89644
BNC2	-0.549245	6.77164	0.044969	-0.0842594	6.77164	1	0.464986	6.77164	0.239531
BNIP1	0.248449	2.84159	0.703257	0.0490331	2.84159	1	-0.199416	2.84159	0.833719
BNIP2	0.193938	7.07446	0.769444	0.0713213	7.07446	1	-0.122617	7.07446	0.908451
BNIP3	0.217516	5.66256	0.734614	0.300653	5.66256	0.773192	0.0831364	5.66256	0.949552
BNIP3L	0.35489	7.32952	0.365461	0.212502	7.32952	0.948116	-0.142388	7.32952	0.885983
BNIPL	-0.377646	0.870941	0.565052	0.00802537	0.870941	1	0.385672	0.870941	0.647492
BOC	-0.423805	5.87365	0.215033	-0.0373039	5.87365	1	0.386501	5.87365	0.430062
BOD1	0.039788	4.8051	0.983392	0.0552145	4.8051	1	0.0154265	4.8051	0.999783
BOD1L1	-0.102201	7.17233	0.921449	0.106976	7.17233	1	0.209177	7.17233	0.784501
BOD1L2	-0.279968	-0.310916	0.837665	-0.160115	-0.310916	1	0.119853	-0.310916	0.962202
BOK	0.137888	4.26019	0.881926	-0.513272	4.26019	0.250679	-0.651161	4.26019	0.0547743
BOK-AS1	0.384133	-0.297124	0.703161	-0.671087	-0.297124	0.650132	-1.05522	-0.297124	0.130453
BOLA1	-0.165308	3.77321	0.841311	-0.145232	3.77321	1	0.0200755	3.77321	0.997757
BOLA2	0.194064	2.54122	0.808067	-0.232884	2.54122	0.953314	-0.426948	2.54122	0.434901
BOLA2B	0.193875	2.53925	0.808799	-0.23263	2.53925	0.953314	-0.426505	2.53925	0.435904
BOLA2-SMG1P6	0.00540421	3.89736	1	-0.143424	3.89736	1	-0.148828	3.89736	0.88653
BOLA3	0.211715	3.73094	0.756437	-0.378034	3.73094	0.606766	-0.589749	3.73094	0.11659
BOLA3-AS1	0.464592	1.55563	0.294904	0.171266	1.55563	1	-0.293326	1.55563	0.74658
BOLL	-0.0705355	0.247609	0.976774	-0.241424	0.247609	1	-0.170889	0.247609	0.924089
BOP1	-0.00174495	4.58194	1	-0.378493	4.58194	0.567802	-0.376748	4.58194	0.464922
BORA	-0.10553	3.0428	0.926634	-0.333554	3.0428	0.735195	-0.228024	3.0428	0.787708
BORCS5	0.0632324	3.06453	0.970338	-0.0602208	3.06453	1	-0.123453	3.06453	0.919256
BORCS6	0.054	3.36265	0.974853	-0.118662	3.36265	1	-0.172662	3.36265	0.865722
BORCS7	0.0433899	4.28197	0.980831	0.0451784	4.28197	1	0.00178855	4.28197	1
BORCS7-ASMT	-0.10235	4.36662	0.924693	0.0431516	4.36662	1	0.145502	4.36662	0.888454
BORCS8	-0.0188849	2.96338	0.997516	0.0587587	2.96338	1	0.0776435	2.96338	0.957367
BORCS8-MEF2B	-0.143083	2.75187	0.88711	0.0231185	2.75187	1	0.166202	2.75187	0.875519
BPESC1	-0.819323	0.556645	0.0336539	-0.821392	0.556645	0.128596	-0.00206931	0.556645	1
ABCB4	2.2925	3.3985	2.31703e-26	0.596811	3.3985	0.213699	-1.69569	3.3985	2.83304e-10
BPHL	-0.0384477	4.41494	0.9839	-0.171997	4.41494	0.99458	-0.133549	4.41494	0.901602
BPI	0.681873	-1.02424	0.474857	0.360445	-1.02424	1	-0.321427	-1.02424	0.87573
BPIFA1	1.10732	-1.35349	0.120512	0.0243063	-1.35349	1	-1.08301	-1.35349	0.261038
BPIFA2	-0.226038	-1.88096	0.952181	0.178671	-1.88096	1	0.40471	-1.88096	0.896607
BPIFA3	-0.447407	-1.72154	0.8519	0.228671	-1.72154	1	0.676078	-1.72154	0.784501
BPIFA4P	0.200445	-1.79337	0.953075	-0.987071	-1.79337	0.774357	-1.18752	-1.79337	0.481889
BPIFB1	0.153349	0.139434	0.926728	0.435929	0.139434	0.803405	0.28258	0.139434	0.831361
BPIFB2	-0.0895714	-0.54721	0.97553	-0.300127	-0.54721	0.999999	-0.210555	-0.54721	0.922232
BPIFB3	0.161308	-0.704843	0.94412	-0.0673216	-0.704843	1	-0.22863	-0.704843	0.918882
BPIFB4	-0.302259	-1.18695	0.875076	-0.317768	-1.18695	1	-0.0155097	-1.18695	1
BPIFB6	-0.372205	-1.29286	0.827296	-0.498184	-1.29286	0.952898	-0.125979	-1.29286	0.974252
BPIFC	-0.188648	1.70432	0.847288	0.1353	1.70432	1	0.323947	1.70432	0.693876
BPNT1	-0.0931132	3.915	0.936384	-0.0883803	3.915	1	0.00473286	3.915	1
BPTF	-0.0704633	7.45889	0.957184	0.0921337	7.45889	1	0.162597	7.45889	0.85937
BRAF	-0.0606857	4.92884	0.969701	0.149498	4.92884	1	0.210184	4.92884	0.791195
BRAP	0.110111	5.32164	0.912619	0.09241	5.32164	1	-0.0177012	5.32164	0.998676
BRAT1	-0.0991682	4.36548	0.928397	-0.0133256	4.36548	1	0.0858427	4.36548	0.948398
BRCA1	0.225295	3.5819	0.734505	-0.0889512	3.5819	1	-0.314246	3.5819	0.621057
BRCA2	0.40709	3.00246	0.303057	0.0115574	3.00246	1	-0.395532	3.00246	0.469493
BRCAT107	0.155316	-2.05079	0.976189	-0.654498	-2.05079	0.992362	-0.809814	-2.05079	0.783702
BRCAT54	-0.534674	-1.97692	0.838586	0.16473	-1.97692	1	0.699405	-1.97692	0.793144
BRCC3	-0.1479	3.2419	0.87381	-0.33504	3.2419	0.729813	-0.18714	3.2419	0.849715
BRD1	-0.00356627	5.56395	1	0.171274	5.56395	0.992362	0.17484	5.56395	0.844492
BRD2	0.0213296	7.25256	0.994871	0.143174	7.25256	1	0.121845	7.25256	0.908451
BRD3	-0.219365	5.34986	0.727408	0.04494	5.34986	1	0.264305	5.34986	0.69074
BRD4	-0.150037	5.59537	0.857311	0.182805	5.59537	0.979413	0.332842	5.59537	0.539195
BRD7	0.0158409	5.75896	0.997674	0.130357	5.75896	1	0.114516	5.75896	0.918855
BRD7P3	0.00717544	5.4837	1	0.133291	5.4837	1	0.126115	5.4837	0.904384
BRD8	-0.239095	5.33002	0.684017	0.0891635	5.33002	1	0.328259	5.33002	0.548417
BRD9	-0.132474	4.77789	0.88711	0.0758106	4.77789	1	0.208284	4.77789	0.79473
BRDT	0.524936	-0.12505	0.469052	0.322542	-0.12505	0.977312	-0.202394	-0.12505	0.909884
BRDTP1	0.367244	-2.24625	0.932353	0.337747	-2.24625	1	-0.0294976	-2.24625	1
BRE	0.0676989	5.11508	0.961951	-0.0296459	5.11508	1	-0.0973448	5.11508	0.937612
BREA2	-0.0483629	-1.52726	0.99511	-0.757449	-1.52726	0.81227	-0.709086	-1.52726	0.695744
BRE-AS1	0.00835761	1.98593	1	-0.0934013	1.98593	1	-0.101759	1.98593	0.945502
BRF1	-0.120553	5.07283	0.902873	0.0955244	5.07283	1	0.216077	5.07283	0.781347
BRF2	-0.16019	3.72981	0.850545	-0.0809948	3.72981	1	0.0791949	3.72981	0.953379
BRI3	0.260035	5.0536	0.633721	-0.0292511	5.0536	1	-0.289286	5.0536	0.654068
BRI3BP	0.106959	2.61035	0.928397	-0.130352	2.61035	1	-0.23731	2.61035	0.787218
BRICD5	-0.461943	0.755006	0.430546	-0.343294	0.755006	0.887582	0.118649	0.755006	0.949661
BRINP1	-0.831795	2.15426	0.00310671	-1.30242	2.15426	1.82594e-05	-0.47063	2.15426	0.447064
BRINP2	-0.252825	1.16624	0.767241	-0.627239	1.16624	0.298506	-0.374414	1.16624	0.688234
BRINP3	-0.368177	-0.189491	0.73071	0.467485	-0.189491	0.791549	0.835663	-0.189491	0.200022
BRIP1	0.207702	1.31465	0.826017	0.291214	1.31465	0.912643	0.0835125	1.31465	0.961918
BRIX1	0.194063	3.79789	0.78791	0.181023	3.79789	0.9896	-0.0130404	3.79789	0.999837
BRK1	0.0764762	5.6768	0.952181	0.0834866	5.6768	1	0.00701041	5.6768	1
BRMS1	0.060183	4.14526	0.970576	0.0103391	4.14526	1	-0.0498439	4.14526	0.974977
BRMS1L	0.0994356	3.51096	0.931329	0.131734	3.51096	1	0.0322981	3.51096	0.989581
BROX	0.0753754	5.76062	0.952878	0.183897	5.76062	0.978925	0.108521	5.76062	0.924089
BRPF1	0.0553335	4.6004	0.974285	0.281128	4.6004	0.820162	0.225794	4.6004	0.767521
BRPF3	-0.252444	4.66418	0.658828	0.0240342	4.66418	1	0.276478	4.66418	0.675413
BRS3	-0.183344	-1.60961	0.958153	0.227128	-1.60961	1	0.410472	-1.60961	0.879187
BRSK1	-0.260922	1.40761	0.738968	-0.195532	1.40761	1	0.06539	1.40761	0.971779
BRSK2	0.534185	3.01289	0.0906094	0.323411	3.01289	0.765382	-0.210774	3.01289	0.811619
BRWD1	-0.0732678	7.71931	0.954076	-0.145083	7.71931	1	-0.0718152	7.71931	0.956391
BRWD1-AS1	-0.48401	-1.30139	0.760392	-0.508309	-1.30139	0.960359	-0.0242994	-1.30139	1
BRWD1-IT2	-0.33989	0.367387	0.703851	0.128445	0.367387	1	0.468334	0.367387	0.59031
BRWD3	-0.191066	5.51976	0.780311	-0.000584003	5.51976	1	0.190482	5.51976	0.82221
BSCL2	-0.00858686	5.25678	1	0.0587207	5.25678	1	0.0673076	5.25678	0.961451
BSDC1	0.268211	6.30073	0.598589	0.18819	6.30073	0.974329	-0.0800209	6.30073	0.950486
BSG	-0.231992	8.70243	0.700974	-0.36417	8.70243	0.588827	-0.132179	8.70243	0.899407
BSN	-0.0830261	2.36092	0.954007	0.119315	2.36092	1	0.202341	2.36092	0.836874
BSN-AS2	-0.612418	-1.53614	0.68313	-1.13882	-1.53614	0.485031	-0.526398	-1.53614	0.853198
BSND	0.505564	-1.06267	0.678533	-0.378492	-1.06267	1	-0.884056	-1.06267	0.454718
BSPH1	0.344401	-2.53722	0.954561	1.03057	-2.53722	0.910865	0.686174	-2.53722	0.867496
BSPRY	0.275008	3.41073	0.635683	0.483002	3.41073	0.335669	0.207993	3.41073	0.810761
BST1	-0.387159	3.41828	0.340461	-0.00186992	3.41828	1	0.385289	3.41828	0.469542
BST2	0.428897	4.25567	0.216112	0.0128703	4.25567	1	-0.416026	4.25567	0.386314
BSX	-0.79532	-1.42745	0.447168	-0.404507	-1.42745	0.994986	0.390813	-1.42745	0.884165
BTAF1	-0.058611	6.57909	0.970576	0.028589	6.57909	1	0.0872	6.57909	0.945042
BTBD1	0.0431178	6.19919	0.979605	-0.174222	6.19919	0.99032	-0.21734	6.19919	0.777738
BTBD10	0.133027	5.66006	0.883718	0.134468	5.66006	1	0.00144095	5.66006	1
BTBD11	0.502442	1.57425	0.21041	0.0555389	1.57425	1	-0.446903	1.57425	0.463077
BTBD16	0.371666	0.110846	0.660674	-0.322731	0.110846	0.96279	-0.694397	0.110846	0.309669
BTBD17	0.520375	-0.676418	0.565061	0.187451	-0.676418	1	-0.332924	-0.676418	0.84176
BTBD18	-0.0787574	1.58882	0.963213	0.23562	1.58882	0.965552	0.314377	1.58882	0.697711
BTBD19	-0.212389	1.9877	0.795642	-0.185575	1.9877	1	0.0268146	1.9877	0.993042
BTBD2	-0.196159	6.11477	0.766231	0.125884	6.11477	1	0.322043	6.11477	0.554924
BTBD3	-0.156949	4.40064	0.850545	0.00254057	4.40064	1	0.159489	4.40064	0.870759
BTBD6	-0.0054965	5.38124	1	-0.353444	5.38124	0.627023	-0.347947	5.38124	0.514202
BTBD7	-0.0312402	6.17728	0.988981	0.107511	6.17728	1	0.138751	6.17728	0.888454
BTBD8	-0.138847	1.14833	0.920294	0.338916	1.14833	0.853957	0.477763	1.14833	0.473776
BTBD9	0.158379	5.21598	0.842763	0.206169	5.21598	0.955987	0.04779	5.21598	0.975623
BTC	0.754942	2.36139	0.00722233	0.516766	2.36139	0.345891	-0.238177	2.36139	0.79007
BTD	0.328819	5.90189	0.449247	-0.0386703	5.90189	1	-0.36749	5.90189	0.468306
BTF3	-0.111094	7.32351	0.91015	0.0322087	7.32351	1	0.143302	7.32351	0.882724
BTF3L4	0.0974175	4.93557	0.928714	0.20249	4.93557	0.959158	0.105072	4.93557	0.930135
BTF3P11	0.151006	0.0683595	0.928397	0.109824	0.0683595	1	-0.0411823	0.0683595	0.991998
BTG1	-0.155287	7.28631	0.843979	-0.214507	7.28631	0.942494	-0.0592202	7.28631	0.965466
BTG2	0.220592	6.06594	0.721967	-0.0180503	6.06594	1	-0.238642	6.06594	0.747864
BTG3	-0.010769	3.51556	1	0.0745655	3.51556	1	0.0853345	3.51556	0.950381
BTG4	-0.151895	-0.0981994	0.930945	-0.440022	-0.0981994	0.864963	-0.288128	-0.0981994	0.86126
BTK	0.567861	2.89817	0.0627141	0.115202	2.89817	1	-0.452659	2.89817	0.3658
BTLA	0.843769	0.440447	0.0245436	0.132483	0.440447	1	-0.711285	0.440447	0.225958
BTN1A1	-0.186825	-0.771204	0.927171	-0.25851	-0.771204	1	-0.0716853	-0.771204	0.985315
BTN2A1	0.210802	4.95521	0.743112	0.130302	4.95521	1	-0.0804999	4.95521	0.951244
BTN2A2	0.245613	4.85596	0.674614	0.127723	4.85596	1	-0.117889	4.85596	0.91839
BTN2A3P	0.253816	4.22799	0.661894	0.100403	4.22799	1	-0.153412	4.22799	0.878884
BTN3A1	0.220947	5.07946	0.726925	-0.107734	5.07946	1	-0.328681	5.07946	0.573279
BTN3A2	0.324238	5.52202	0.460238	-0.00216286	5.52202	1	-0.326401	5.52202	0.573279
BTN3A3	0.458016	5.95512	0.14551	0.129395	5.95512	1	-0.328621	5.95512	0.565033
BTNL10	0.10926	-2.1925	0.987478	-1.54242	-2.1925	0.620705	-1.65168	-2.1925	0.444795
BTNL3	-0.201344	1.252	0.843358	-0.12367	1.252	1	0.0776739	1.252	0.965456
BTNL8	-0.199487	0.420099	0.877917	-0.25807	0.420099	0.987778	-0.0585829	0.420099	0.981245
BTNL9	-0.0583682	7.92388	0.970576	-0.483715	7.92388	0.285927	-0.425347	7.92388	0.360139
BTRC	-0.015219	4.85052	0.997674	0.091416	4.85052	1	0.106635	4.85052	0.928654
BUB1	0.794006	1.17518	0.0162916	0.0626052	1.17518	1	-0.731401	1.17518	0.125085
AKR1B15	2.29246	9.52371	3.69531e-31	0.84787	9.52371	0.00414628	-1.44459	9.52371	1.8297e-08
BUB1B-PAK6	0.210227	0.399795	0.871812	0.612286	0.399795	0.434349	0.402059	0.399795	0.659969
BUB3	-0.059745	5.31285	0.970184	-0.0348797	5.31285	1	0.0248653	5.31285	0.992116
BUD13	-0.138421	3.78618	0.883718	0.0790059	3.78618	1	0.217427	3.78618	0.789561
BUD31	0.0940775	4.11439	0.934967	-0.0894401	4.11439	1	-0.183518	4.11439	0.84176
BVES	0.325547	3.26265	0.508619	0.64819	3.26265	0.0735934	0.322643	3.26265	0.603152
BVES-AS1	0.0947099	-1.49232	0.983543	-0.0572849	-1.49232	1	-0.151995	-1.49232	0.965466
BYSL	0.326981	2.87882	0.51313	-0.00377294	2.87882	1	-0.330754	2.87882	0.617152
BZW1	0.341253	7.59968	0.398635	0.0582844	7.59968	1	-0.282969	7.59968	0.649903
BZW2	0.270251	5.21839	0.602103	0.0753387	5.21839	1	-0.194913	5.21839	0.820135
C10orf10	-0.678527	6.45619	0.00752626	-0.855161	6.45619	0.00427931	-0.176634	6.45619	0.84176
C10orf105	0.408856	0.980658	0.496994	0.160262	0.980658	1	-0.248594	0.980658	0.823525
C10orf107	-0.469948	3.72204	0.165664	-0.675033	3.72204	0.0613973	-0.205084	3.72204	0.818791
C10orf11	-0.0711626	2.14867	0.967824	-0.0836559	2.14867	1	-0.0124934	2.14867	1
C10orf111	0.108785	-0.272442	0.963813	-0.151491	-0.272442	1	-0.260276	-0.272442	0.875519
C10orf113	0.438938	-1.41409	0.826141	0.413256	-1.41409	1	-0.0256817	-1.41409	1
C10orf12	0.127656	4.4045	0.89487	0.0162446	4.4045	1	-0.111411	4.4045	0.924089
C10orf120	-0.323846	-1.92799	0.908223	-0.425784	-1.92799	1	-0.101939	-1.92799	0.989581
C10orf126	0.281834	-2.19339	0.950102	-0.556902	-2.19339	1	-0.838736	-2.19339	0.773617
C10orf128	0.133513	4.02232	0.889129	-0.269906	4.02232	0.862368	-0.403419	4.02232	0.423276
C10orf131	-0.126152	-0.618358	0.96292	0.181819	-0.618358	1	0.307971	-0.618358	0.867497
C10orf142	-0.00674791	-1.67371	1	-0.443243	-1.67371	1	-0.436495	-1.67371	0.878616
C10orf2	-0.126017	3.2782	0.903315	0.0617045	3.2782	1	0.187721	3.2782	0.84176
C10orf25	0.171328	2.85624	0.841086	-0.0506482	2.85624	1	-0.221976	2.85624	0.799374
C10orf35	0.371966	0.495149	0.63625	-0.194438	0.495149	1	-0.566404	0.495149	0.460845
C10orf53	-0.604855	-1.77257	0.760392	0.433166	-1.77257	1	1.03802	-1.77257	0.51908
C10orf54	0.212125	6.0575	0.739192	0.294297	6.0575	0.782005	0.0821723	6.0575	0.948398
C10orf55	-0.351284	3.92379	0.424076	-0.730681	3.92379	0.0243886	-0.379397	3.92379	0.472765
C10orf62	-0.307407	-0.93635	0.861187	0.0828909	-0.93635	1	0.390298	-0.93635	0.851272
C10orf67	0.36131	-1.89087	0.90009	-0.363246	-1.89087	1	-0.724556	-1.89087	0.794341
C10orf71	0.0556734	1.43711	0.978646	0.202193	1.43711	1	0.14652	1.43711	0.919256
C10orf71-AS1	-0.59251	-2.08953	0.799725	-0.214177	-2.08953	1	0.378334	-2.08953	0.926387
C10orf76	-0.0605454	4.90187	0.969738	-0.0437973	4.90187	1	0.0167481	4.90187	0.999389
C10orf82	-0.285531	-1.50983	0.914884	-0.0121827	-1.50983	1	0.273348	-1.50983	0.935213
C10orf88	0.104158	3.61788	0.923885	-0.151889	3.61788	1	-0.256047	3.61788	0.735828
S100A8	2.2792	2.8255	1.06862e-20	0.0688421	2.8255	1	-2.21036	2.8255	3.73165e-13
C10orf91	0.105296	3.90917	0.922409	0.196713	3.90917	0.974376	0.0914179	3.90917	0.944334
C10orf95	-0.230951	-0.0316585	0.867199	-0.0825243	-0.0316585	1	0.148426	-0.0316585	0.942291
C10orf99	-0.1573	0.672274	0.91015	0.479723	0.672274	0.598045	0.637023	0.672274	0.25441
C11orf1	0.0208653	3.09785	0.995877	-0.0488316	3.09785	1	-0.0696969	3.09785	0.962619
C11orf16	-0.380913	-0.811592	0.773002	-0.108475	-0.811592	1	0.272438	-0.811592	0.900409
C11orf21	-0.0809308	-1.28407	0.985477	-0.543267	-1.28407	0.925528	-0.462336	-1.28407	0.826497
C11orf24	0.00384434	5.1403	1	-0.322995	5.1403	0.710862	-0.326839	5.1403	0.563569
C11orf31	-0.229129	4.49973	0.712373	-0.307197	4.49973	0.767484	-0.0780686	4.49973	0.953379
C11orf40	-0.681215	-2.66673	0.894393	-0.984029	-2.66673	0.993337	-0.302814	-2.66673	0.976331
C11orf42	-0.430159	0.230553	0.563014	-0.285666	0.230553	0.98131	0.144494	0.230553	0.942266
C11orf44	0.897245	0.168335	0.0204081	0.356382	0.168335	0.927749	-0.540862	0.168335	0.47927
C11orf45	-0.2693	0.738853	0.757199	-0.621413	0.738853	0.371298	-0.352113	0.738853	0.735424
C11orf49	-0.107467	3.95501	0.920294	0.311292	3.95501	0.761337	0.418759	3.95501	0.372568
C11orf52	1.53804	2.2787	2.61071e-11	0.94564	2.2787	0.00427931	-0.5924	2.2787	0.161313
C11orf53	-0.336156	0.78832	0.68964	0.655952	0.78832	0.260677	0.992108	0.78832	0.0153151
C11orf54	0.0060217	2.933	1	0.392228	2.933	0.566285	0.386207	2.933	0.483349
C11orf57	-0.0821311	4.82726	0.948666	0.0622722	4.82726	1	0.144403	4.82726	0.88615
C11orf58	0.0471868	6.12325	0.977472	0.110714	6.12325	1	0.0635268	6.12325	0.962619
C11orf63	-0.0575791	3.1807	0.974285	0.39732	3.1807	0.546988	0.454899	3.1807	0.324694
C11orf65	-0.338959	-1.24021	0.865871	0.159661	-1.24021	1	0.49862	-1.24021	0.79007
C11orf68	-0.0281891	4.30626	0.991406	-0.0491517	4.30626	1	-0.0209626	4.30626	0.996617
C11orf70	-0.934295	-0.944413	0.148437	-0.724903	-0.944413	0.593067	0.209391	-0.944413	0.940451
C11orf71	-0.0329538	2.34363	0.990288	0.0666076	2.34363	1	0.0995614	2.34363	0.945274
C11orf74	-0.0214992	2.93645	0.995176	0.229529	2.93645	0.946232	0.251028	2.93645	0.751832
C11orf80	-0.0857242	2.5996	0.952058	0.0922835	2.5996	1	0.178008	2.5996	0.864731
C11orf84	0.0424104	3.00275	0.983332	-0.00219713	3.00275	1	-0.0446075	3.00275	0.980476
C11orf86	0.186103	-1.7988	0.964471	0.586509	-1.7988	0.952656	0.400406	-1.7988	0.887139
C11orf87	-1.34416	1.87718	5.65538e-08	-1.028	1.87718	0.00154392	0.316155	1.87718	0.71164
C11orf88	0.394326	-0.905563	0.774009	-0.109896	-0.905563	1	-0.504223	-0.905563	0.762037
C11orf91	-0.11533	0.0290166	0.954561	0.0340247	0.0290166	1	0.149355	0.0290166	0.94528
C11orf94	0.0471946	-0.66979	0.993245	0.15459	-0.66979	1	0.107396	-0.66979	0.968958
C11orf95	-0.399376	5.46515	0.262315	0.0293181	5.46515	1	0.428694	5.46515	0.319788
C11orf96	0.0777788	3.26973	0.954873	0.00595984	3.26973	1	-0.071819	3.26973	0.961451
C11orf97	-0.380143	-2.33019	0.922409	-0.514796	-2.33019	1	-0.134653	-2.33019	0.989417
C11orf98	0.338484	4.30449	0.448639	0.29651	4.30449	0.794005	-0.0419742	4.30449	0.980565
C12orf10	0.0429076	3.50226	0.982178	0.211324	3.50226	0.959158	0.168416	3.50226	0.865958
C12orf29	-0.0481624	3.28567	0.978437	0.123162	3.28567	1	0.171324	3.28567	0.863635
C12orf4	0.0799162	4.44042	0.952004	-0.0321533	4.44042	1	-0.112069	4.44042	0.924022
C12orf40	-0.199999	1.73525	0.825023	-0.121726	1.73525	1	0.078273	1.73525	0.962619
C12orf42	0.204444	3.24528	0.773841	0.182426	3.24528	0.992362	-0.0220181	3.24528	0.996297
C12orf43	0.121544	2.11633	0.916743	0.0305919	2.11633	1	-0.0909517	2.11633	0.951681
[truncated: 24,270 more rows]

## Sheet: Table S2
Top 200 WSD-induced genes whose expression was reversed by CR. DEGs were filtered using the following parameters: WSD/CHOW, Log2 (fold change)>1.0 and FDR<0.05; CR/WSD, FDR<0.05.
Ensembl_ID	Entrez Gene Name	WSD/CHOW_FC	WSD/CHOW_CPM	WSD/CHOW_FDR	CR/CHOW_FC	CR/CHOW_CPM	CR/CHOW_FDR	CR/WSD_FC	CR/WSD_CPM	CR/WSD_FDR
ALAS2	5'-aminolevulinate synthase 2(ALAS2)	3.56373	4.33607	3.14267e-52	1.23659	4.33607	0.00021131	-2.32714	4.33607	1.0657e-19
HBZ	hemoglobin subunit zeta(HBZ)	3.35303	5.46493	7.26102e-49	0.788802	5.46493	0.0662478	-2.56422	5.46493	5.07127e-23
HBD	hypophosphatemic bone disease(HBD)	3.14326	7.94266	2.21585e-47	1.28352	7.94266	3.6297e-05	-1.85974	7.94266	5.32233e-13
HBB	hemoglobin subunit beta(HBB)	3.11214	10.9748	1.01735e-46	1.26455	10.9748	4.63923e-05	-1.8476	10.9748	5.70627e-13
HBA1	hemoglobin subunit alpha 1(HBA1)	3.08657	10.6617	1.10007e-46	0.874974	10.6617	0.0130229	-2.2116	10.6617	1.7718e-18
HBA2	hemoglobin subunit alpha 2(HBA2)	3.08657	10.6617	1.10007e-46	0.874974	10.6617	0.0130229	-2.2116	10.6617	1.7718e-18
HBE1	hemoglobin subunit epsilon 1(HBE1)	3.07871	8.06173	1.77245e-45	1.22636	8.06173	9.48654e-05	-1.85236	8.06173	5.62531e-13
S100A9	S100 calcium binding protein A9(S100A9)	3.06468	2.27341	4.12999e-35	0.538383	2.27341	0.515877	-2.5263	2.27341	1.41686e-18
PF4	platelet factor 4(PF4)	2.98309	0.624772	4.87608e-22	1.70489	0.624772	0.000119987	-1.27819	0.624772	0.000540002
OXTR	oxytocin receptor(OXTR)	2.92894	4.88442	2.65516e-44	1.66589	4.88442	2.95794e-11	-1.26306	4.88442	5.03233e-06
GYPE	glycophorin E (MNS blood group)(GYPE)	2.87442	2.12346	3.95128e-32	1.0008	2.12346	0.0203083	-1.87362	2.12346	2.06128e-10
CRYAB	crystallin alpha B(CRYAB)	2.83826	7.84264	4.96441e-45	1.7418	7.84264	1.24339e-11	-1.09647	7.84264	0.00013287
GYPA	glycophorin A (MNS blood group)(GYPA)	2.80087	3.1844	5.76114e-35	1.10703	3.1844	0.00163932	-1.69384	3.1844	1.44423e-09
HBBP1	hemoglobin subunit beta pseudogene 1(HBBP1)	2.74989	-1.21471	3.30695e-07	-0.281922	-1.21471	1	-3.03181	-1.21471	1.12597e-06
UCHL1	ubiquitin C-terminal hydrolase L1(UCHL1)	2.72995	6.62488	3.717e-42	1.63568	6.62488	9.38603e-11	-1.09427	6.62488	0.000109216
SLC26A7	solute carrier family 26 member 7(SLC26A7)	2.72649	5.18224	1.22679e-39	1.2097	5.18224	1.18906e-05	-1.51679	5.18224	6.51458e-09
CA1	carbonic anhydrase 1(CA1)	2.66626	1.99321	1.5543e-28	0.979333	1.99321	0.021205	-1.68693	1.99321	6.12101e-09
HBG1	hemoglobin subunit gamma 1(HBG1)	2.62903	1.40096	3.61335e-23	1.04534	1.40096	0.020724	-1.5837	1.40096	2.82771e-07
HBG2	hemoglobin subunit gamma 2(HBG2)	2.62903	1.40096	3.61335e-23	1.04534	1.40096	0.020724	-1.5837	1.40096	2.82771e-07
GYPB	glycophorin B (MNS blood group)(GYPB)	2.58224	0.730329	1.09404e-19	0.462352	0.730329	0.840065	-2.11989	0.730329	6.37761e-10
SNCA	synuclein alpha(SNCA)	2.53577	3.16173	8.45689e-29	1.1057	3.16173	0.000763546	-1.43007	3.16173	8.75298e-08
PPBP	pro-platelet basic protein(PPBP)	2.48701	2.69539	4.11919e-27	0.898472	2.69539	0.0267689	-1.58854	2.69539	2.10489e-08
PF4V1	platelet factor 4 variant 1(PF4V1)	2.39954	-0.526759	1.74367e-09	0.617242	-0.526759	0.830393	-1.7823	-0.526759	0.000110838
OR8J3	olfactory receptor family 8 subfamily J member 3(OR8J3)	2.39672	-2.1678	0.00657237	-0.254181	-2.1678	1	-2.6509	-2.1678	0.0268584
CXCL1	C-X-C motif chemokine ligand 1(CXCL1)	2.37621	0.232745	1.1695e-13	1.12622	0.232745	0.0947129	-1.25	0.232745	0.00614613
FRZB	frizzled-related protein(FRZB)	2.32871	7.27085	2.77176e-30	1.56435	7.27085	1.38346e-09	-0.764357	7.27085	0.0110838
ABCB4	ATP binding cassette subfamily B member 4(ABCB4)	2.2925	3.3985	2.31703e-26	0.596811	3.3985	0.213699	-1.69569	3.3985	2.83304e-10
AKR1B15	aldo-keto reductase family 1 member B15(AKR1B15)	2.29246	9.52371	3.69531e-31	0.84787	9.52371	0.00414628	-1.44459	9.52371	1.8297e-08
S100A8	S100 calcium binding protein A8(S100A8)	2.2792	2.8255	1.06862e-20	0.0688421	2.8255	1	-2.21036	2.8255	3.73165e-13
AKR1B10	aldo-keto reductase family 1 member B10(AKR1B10)	2.2404	9.4153	8.10531e-30	0.830655	9.4153	0.00552895	-1.40975	9.4153	4.47278e-08
SLC24A2	solute carrier family 24 member 2(SLC24A2)	2.14687	5.72574	2.89132e-26	0.518784	5.72574	0.323963	-1.62809	5.72574	7.58419e-10
SPRR1B	small proline rich protein 1B(SPRR1B)	2.11137	-0.924896	9.11059e-05	-0.16341	-0.924896	1	-2.27478	-0.924896	0.000125093
CSF3R	colony stimulating factor 3 receptor(CSF3R)	2.01224	2.70158	1.22191e-19	0.546825	2.70158	0.335239	-1.46541	2.70158	8.79616e-08
PNLIPRP1	pancreatic lipase related protein 1(PNLIPRP1)	1.97483	0.634537	1.22661e-11	0.107791	0.634537	1	-1.86704	0.634537	2.1957e-06
CLEC1B	C-type lectin domain family 1 member B(CLEC1B)	1.95685	-0.0684985	1.30745e-09	0.110469	-0.0684985	1	-1.84638	-0.0684985	1.25187e-05
TM4SF19	transmembrane 4 L six family member 19(TM4SF19)	1.95331	3.61847	5.37466e-18	0.532519	3.61847	0.344554	-1.42079	3.61847	2.09502e-06
SLAMF9	SLAM family member 9(SLAMF9)	1.94652	2.75329	2.59559e-17	0.543368	2.75329	0.341259	-1.40315	2.75329	3.07459e-06
LOC102724020	uncharacterized LOC102724020(LOC102724020)	1.93694	-0.196392	6.38585e-08	0.669964	-0.196392	0.620825	-1.26698	-0.196392	0.0101044
UNC13C	unc-13 homolog C(UNC13C)	1.927	2.10299	2.22627e-14	1.13985	2.10299	0.000866194	-0.787153	2.10299	0.0416455
CAMP	cathelicidin antimicrobial peptide(CAMP)	1.90525	0.729176	4.13477e-11	0.58211	0.729176	0.506176	-1.32314	0.729176	0.000274299
KRT79	keratin 79(KRT79)	1.89577	2.23524	2.79663e-16	0.546774	2.23524	0.351941	-1.349	2.23524	3.58279e-06
CLEC12B	C-type lectin domain family 12 member B(CLEC12B)	1.89229	0.514587	2.51693e-10	0.557246	0.514587	0.645391	-1.33505	0.514587	0.000896128
PTGR1	prostaglandin reductase 1(PTGR1)	1.8863	7.9132	2.85543e-21	1.05892	7.9132	0.000109432	-0.827375	7.9132	0.0074673
FAM19A4	family with sequence similarity 19 member A4, C-C motif chemokine like(FAM19A4)	1.87152	4.82717	7.77097e-20	1.07918	4.82717	0.000102239	-0.792344	4.82717	0.0102014
GBP2	guanylate binding protein 2(GBP2)	1.85003	4.70142	8.73492e-20	0.66309	4.70142	0.0515853	-1.18694	4.70142	5.72868e-06
GPR84	G protein-coupled receptor 84(GPR84)	1.84628	0.647774	1.88492e-10	0.523464	0.647774	0.733966	-1.32282	0.647774	0.00125442
PLPP4	phospholipid phosphatase 4(PLPP4)	1.83992	0.771529	1.23386e-11	0.50834	0.771529	0.656635	-1.33158	0.771529	0.000267133
COMP	cartilage oligomeric matrix protein(COMP)	1.79916	4.66948	4.54919e-15	0.0922003	4.66948	1	-1.70696	4.66948	4.2582e-11
AQP3	aquaporin 3 (Gill blood group)(AQP3)	1.72899	0.987428	1.21537e-08	0.271377	0.987428	0.993698	-1.45762	0.987428	3.26417e-05
HEMGN	hemogen(HEMGN)	1.72167	1.22449	4.82641e-11	0.538015	1.22449	0.546073	-1.18365	1.22449	0.000581525
TRIB3	tribbles pseudokinase 3(TRIB3)	1.7047	1.28091	3.10683e-11	0.764817	1.28091	0.114733	-0.939886	1.28091	0.00989964
PRCAT47	prostate cancer-associated 47(PRCAT47)	1.70387	0.690409	1.92012e-09	0.422168	0.690409	0.874705	-1.2817	0.690409	0.00195003
S100A7	S100 calcium binding protein A7(S100A7)	1.69214	-1.66187	0.0282262	-0.0284922	-1.66187	1	-1.72064	-1.66187	0.0441311
HBQ1	hemoglobin subunit theta 1(HBQ1)	1.66993	2.45579	6.68219e-13	0.00858707	2.45579	1	-1.66135	2.45579	2.5743e-09
OASL	2'-5'-oligoadenylate synthetase like(OASL)	1.66833	1.16694	9.26116e-10	0.67061	1.16694	0.342148	-0.997716	1.16694	0.0169475
TM4SF19-TCTEX1D2	TM4SF19-TCTEX1D2 readthrough (NMD candidate)(TM4SF19-TCTEX1D2)	1.66489	3.64051	5.13356e-14	0.472909	3.64051	0.425867	-1.19198	3.64051	5.2472e-05
DKK1	dickkopf WNT signaling pathway inhibitor 1(DKK1)	1.65042	1.51742	6.77033e-11	-0.366439	1.51742	0.894617	-2.01686	1.51742	3.7388e-10
TNMD	tenomodulin(TNMD)	1.63501	1.80248	6.00344e-11	-0.151846	1.80248	1	-1.78686	1.80248	4.05763e-09
TM4SF19-AS1	TM4SF19 antisense RNA 1(TM4SF19-AS1)	1.63467	2.87847	2.98016e-12	0.25267	2.87847	0.951725	-1.382	2.87847	4.51312e-06
GLDN	gliomedin(GLDN)	1.61381	4.42371	2.64292e-14	-0.131187	4.42371	1	-1.745	4.42371	6.28947e-11
FAM46C	family with sequence similarity 46 member C(FAM46C)	1.57685	4.94208	3.47182e-14	0.673452	4.94208	0.0528049	-0.903402	4.94208	0.00105126
LOC254896	uncharacterized LOC254896(LOC254896)	1.57183	0.0925485	1.43408e-06	0.00681428	0.0925485	1	-1.56501	0.0925485	6.44265e-05
C10orf90	chromosome 10 open reading frame 90(C10orf90)	1.56042	1.19883	2.97743e-09	0.545635	1.19883	0.497131	-1.01478	1.19883	0.00734474
LDLR	low density lipoprotein receptor(LDLR)	1.55526	5.71452	1.38811e-14	-0.490755	5.71452	0.283945	-2.04602	5.71452	4.32015e-17
IFIT1B	interferon induced protein with tetratricopeptide repeats 1B(IFIT1B)	1.55276	3.22902	4.49927e-12	0.440521	3.22902	0.529333	-1.11224	3.22902	0.000167763
PLIN2	perilipin 2(PLIN2)	1.54609	7.69715	1.11402e-14	0.349801	7.69715	0.6235	-1.19629	7.69715	4.6939e-06
CRABP1	cellular retinoic acid binding protein 1(CRABP1)	1.52473	2.13245	1.24958e-10	0.491006	2.13245	0.479934	-1.03372	2.13245	0.00105455
PLEK	pleckstrin(PLEK)	1.51981	3.77588	1.00332e-12	0.485309	3.77588	0.363004	-1.0345	3.77588	0.000299203
TNFRSF10C	TNF receptor superfamily member 10c(TNFRSF10C)	1.51481	0.95195	4.21552e-08	0.263037	0.95195	0.979101	-1.25177	0.95195	0.000208526
MSR1	macrophage scavenger receptor 1(MSR1)	1.50364	5.98396	7.5473e-13	0.506804	5.98396	0.231012	-0.996838	5.98396	0.0005087
FAM3B	family with sequence similarity 3 member B(FAM3B)	1.49783	1.44571	4.05769e-09	0.537373	1.44571	0.431563	-0.960459	1.44571	0.00702671
ENPP4	ectonucleotide pyrophosphatase/phosphodiesterase 4 (putative)(ENPP4)	1.49276	6.56901	1.1695e-13	0.358759	6.56901	0.647293	-1.134	6.56901	2.35151e-05
CD52	CD52 molecule(CD52)	1.48415	5.54048	4.97581e-13	0.431623	5.54048	0.456296	-1.05253	5.54048	0.000173906
SELL	selectin L(SELL)	1.46699	1.82044	1.77896e-09	0.114174	1.82044	1	-1.35282	1.82044	5.58618e-06
SLC4A1	solute carrier family 4 member 1 (Diego blood group)(SLC4A1)	1.45792	1.59042	7.54459e-09	0.587038	1.59042	0.335583	-0.870886	1.59042	0.0133818
SHCBP1	SHC binding and spindle associated 1(SHCBP1)	1.44557	1.97128	1.52983e-09	0.304447	1.97128	0.887582	-1.14113	1.97128	0.000364794
TNIP3	TNFAIP3 interacting protein 3(TNIP3)	1.44115	1.62929	8.04081e-09	0.360147	1.62929	0.827571	-1.081	1.62929	0.00152022
CCL5	C-C motif chemokine ligand 5(CCL5)	1.43522	1.04429	3.32876e-07	0.401797	1.04429	0.819432	-1.03342	1.04429	0.0102578
DHRS9	dehydrogenase/reductase 9(DHRS9)	1.4242	1.74155	9.16244e-09	0.360448	1.74155	0.825531	-1.06375	1.74155	0.00237223
MATK	megakaryocyte-associated tyrosine kinase(MATK)	1.41594	2.78693	8.91738e-10	0.377476	2.78693	0.689517	-1.03846	2.78693	0.000893703
PRAP1	proline rich acidic protein 1(PRAP1)	1.38282	2.70669	8.41205e-10	0.538899	2.70669	0.318856	-0.843924	2.70669	0.0112601
MGAM	maltase-glucoamylase(MGAM)	1.37538	1.37521	1.64875e-07	0.281305	1.37521	0.948209	-1.09408	1.37521	0.00108551
CRLF2	cytokine receptor-like factor 2(CRLF2)	1.37237	1.22037	3.35194e-07	-0.359908	1.22037	0.88877	-1.73228	1.22037	3.89034e-07
FCGR3A	Fc fragment of IgG receptor IIIa(FCGR3A)	1.37088	3.79895	2.74806e-10	-0.02584	3.79895	1	-1.39672	3.79895	1.48249e-07
GPR158	G protein-coupled receptor 158(GPR158)	1.36326	2.63733	4.22703e-09	0.261104	2.63733	0.934299	-1.10215	2.63733	0.000173906
FCGR3B	Fc fragment of IgG receptor IIIb(FCGR3B)	1.36095	3.80653	3.65986e-10	-0.0312221	3.80653	1	-1.39217	3.80653	1.64584e-07
SULT1B1	sulfotransferase family 1B member 1(SULT1B1)	1.36088	1.73663	5.19641e-08	-0.787091	1.73663	0.171916	-2.14797	1.73663	6.11002e-11
AQP9	aquaporin 9(AQP9)	1.34619	0.883718	1.56921e-06	0.321741	0.883718	0.942494	-1.02445	0.883718	0.0129938
IL1RN	interleukin 1 receptor antagonist(IL1RN)	1.34108	0.945863	2.39733e-06	0.0394306	0.945863	1	-1.30165	0.945863	0.000672733
UBXN11	UBX domain protein 11(UBXN11)	1.33836	4.33423	1.71421e-10	0.508365	4.33423	0.274022	-0.829999	4.33423	0.00670038
PLIN4	perilipin 4(PLIN4)	1.33829	12.2137	3.86321e-11	0.167508	12.2137	1	-1.17079	12.2137	2.46291e-05
SRXN1	sulfiredoxin 1(SRXN1)	1.33544	5.04529	9.41186e-11	0.241046	5.04529	0.906339	-1.09439	5.04529	3.58338e-05
C1orf141	chromosome 1 open reading frame 141(C1orf141)	1.32888	3.36978	4.03227e-09	0.110053	3.36978	1	-1.21883	3.36978	2.54338e-05
CD300A	CD300a molecule(CD300A)	1.32628	0.748655	6.17022e-06	0.361746	0.748655	0.889834	-0.964532	0.748655	0.0241532
CPA4	carboxypeptidase A4(CPA4)	1.3096	3.12614	5.98724e-09	0.167771	3.12614	1	-1.14183	3.12614	7.33657e-05
LY86	lymphocyte antigen 86(LY86)	1.30709	1.95156	1.82816e-07	0.0207119	1.95156	1	-1.28638	1.95156	7.03777e-05
PI3	peptidase inhibitor 3(PI3)	1.29809	-0.744913	0.0131494	-0.656556	-0.744913	0.890953	-1.95465	-0.744913	0.00177696
CCR1	C-C motif chemokine receptor 1(CCR1)	1.29557	4.04362	6.93916e-09	0.254586	4.04362	0.900903	-1.04098	4.04362	0.000281963
C8B	complement C8 beta chain(C8B)	1.28284	0.386759	8.58575e-05	-0.0943511	0.386759	1	-1.37719	0.386759	0.000695954
NPR3	natriuretic peptide receptor 3(NPR3)	1.27862	8.57302	1.46682e-09	-0.163291	8.57302	1	-1.44191	8.57302	6.36696e-08
ALDH1A2	aldehyde dehydrogenase 1 family member A2(ALDH1A2)	1.27507	2.03455	2.24642e-07	-0.402582	2.03455	0.747076	-1.67765	2.03455	6.90808e-08
LOC101927637	uncharacterized LOC101927637(LOC101927637)	1.27176	-0.279318	0.00286661	-0.675316	-0.279318	0.684189	-1.94708	-0.279318	2.29306e-05
NFE2	nuclear factor, erythroid 2(NFE2)	1.27045	0.171709	0.000183851	0.216022	0.171709	1	-1.05443	0.171709	0.0164017
ITGB2	integrin subunit beta 2(ITGB2)	1.26795	6.03005	1.5505e-09	0.0394706	6.03005	1	-1.22848	6.03005	2.41449e-06
FCGR1CP	Fc fragment of IgG receptor Ic, pseudogene(FCGR1CP)	1.24878	1.85585	3.66405e-07	-0.308831	1.85585	0.899144	-1.55761	1.85585	2.73321e-07
CXCR2	C-X-C motif chemokine receptor 2(CXCR2)	1.2471	1.08811	7.20653e-06	0.229959	1.08811	0.99458	-1.01714	1.08811	0.00601662
CXCL10	C-X-C motif chemokine ligand 10(CXCL10)	1.23646	1.16569	1.54136e-05	0.0993947	1.16569	1	-1.13706	1.16569	0.00453785
MEST	mesoderm specific transcript(MEST)	1.22594	7.32272	2.61517e-09	-0.274821	7.32272	0.839591	-1.50076	7.32272	1.70887e-09
CPA2	carboxypeptidase A2(CPA2)	1.21456	1.22536	1.03941e-05	0.14915	1.22536	1	-1.06541	1.22536	0.00292371
SH2D4A	SH2 domain containing 4A(SH2D4A)	1.20839	3.22004	8.58759e-08	0.499562	3.22004	0.34381	-0.708827	3.22004	0.0375793
FCGR1B	Fc fragment of IgG receptor Ib(FCGR1B)	1.20039	1.94022	9.50219e-07	-0.300316	1.94022	0.903237	-1.5007	1.94022	6.0468e-07
FCGR1A	Fc fragment of IgG receptor Ia(FCGR1A)	1.19189	1.92432	1.21486e-06	-0.32458	1.92432	0.866392	-1.51647	1.92432	4.75551e-07
DCSTAMP	dendrocyte expressed seven transmembrane protein(DCSTAMP)	1.18107	1.31162	1.44124e-05	-0.40114	1.31162	0.812049	-1.58221	1.31162	3.04186e-06
GABRB1	gamma-aminobutyric acid type A receptor beta1 subunit(GABRB1)	1.18064	0.539294	0.000146153	-0.0952246	0.539294	1	-1.27586	0.539294	0.00228322
NQO1	NAD(P)H quinone dehydrogenase 1(NQO1)	1.17917	6.02231	1.62499e-08	0.202425	6.02231	0.96279	-0.976747	6.02231	0.00030943
BCL2A1	BCL2 related protein A1(BCL2A1)	1.17509	0.582565	0.00011159	0.214283	0.582565	1	-0.960808	0.582565	0.0275346
ISG15	ISG15 ubiquitin-like modifier(ISG15)	1.17328	1.48798	2.89614e-05	0.220418	1.48798	1	-0.952863	1.48798	0.0288019
OPN3	opsin 3(OPN3)	1.1713	2.0526	1.57239e-06	0.244542	2.0526	0.957783	-0.926762	2.0526	0.00559551
CCL15	C-C motif chemokine ligand 15(CCL15)	1.16723	0.14743	0.000747654	-0.429997	0.14743	0.916677	-1.59723	0.14743	0.000839761
LILRA3	leukocyte immunoglobulin like receptor A3(LILRA3)	1.16445	0.516924	0.000171557	-0.531955	0.516924	0.713427	-1.69641	0.516924	1.49516e-05
LIPA	lipase A, lysosomal acid type(LIPA)	1.16097	7.81654	4.86628e-08	0.216618	7.81654	0.941123	-0.944352	7.81654	0.000869783
PLA2G7	phospholipase A2 group VII(PLA2G7)	1.16045	3.16379	4.34191e-07	0.202015	3.16379	0.984167	-0.958436	3.16379	0.00207106
LOC100507642	uncharacterized LOC100507642(LOC100507642)	1.15661	-1.04568	0.0393294	-0.597528	-1.04568	0.948518	-1.75413	-1.04568	0.0262774
LCP1	lymphocyte cytosolic protein 1(LCP1)	1.15625	6.26713	6.80182e-08	0.206803	6.26713	0.953314	-0.949449	6.26713	0.000601145
HSD11B1	hydroxysteroid 11-beta dehydrogenase 1(HSD11B1)	1.15391	3.54782	4.93479e-07	-0.328696	3.54782	0.806809	-1.4826	3.54782	2.50158e-07
SPRY4	sprouty RTK signaling antagonist 4(SPRY4)	1.14639	4.23752	1.3049e-07	0.00110003	4.23752	1	-1.14529	4.23752	2.54571e-05
CCL3	C-C motif chemokine ligand 3(CCL3)	1.14399	2.41172	4.00145e-06	0.377744	2.41172	0.711973	-0.766245	2.41172	0.0408663
MMD	monocyte to macrophage differentiation associated(MMD)	1.13398	8.25329	6.76495e-08	-0.271757	8.25329	0.860155	-1.40574	8.25329	4.34692e-08
CSF2RA	colony stimulating factor 2 receptor alpha subunit(CSF2RA)	1.13222	3.02598	9.26551e-07	-0.00907935	3.02598	1	-1.1413	3.02598	7.88194e-05
CLEC12A	C-type lectin domain family 12 member A(CLEC12A)	1.13119	0.780272	0.00025876	-0.0190006	0.780272	1	-1.15019	0.780272	0.00427969
SLFN14	schlafen family member 14(SLFN14)	1.12919	-0.158945	0.0040862	-0.0429497	-0.158945	1	-1.17214	-0.158945	0.0202423
VNN2	vanin 2(VNN2)	1.12787	-0.661847	0.0139287	-0.457371	-0.661847	0.953321	-1.58524	-0.661847	0.00478578
CXorf21	chromosome X open reading frame 21(CXorf21)	1.12565	0.517474	0.000483086	0.0580163	0.517474	1	-1.06764	0.517474	0.0157645
DNASE2B	deoxyribonuclease 2 beta(DNASE2B)	1.12217	3.67431	7.76527e-07	0.238397	3.67431	0.927749	-0.883773	3.67431	0.00472608
TLR3	toll like receptor 3(TLR3)	1.11944	4.151	2.43521e-07	0.415458	4.151	0.492961	-0.703984	4.151	0.0275837
ESCO2	establishment of sister chromatid cohesion N-acetyltransferase 2(ESCO2)	1.10486	0.446276	0.00121854	0.0970088	0.446276	1	-1.00785	0.446276	0.0287493
SERPINE1	serpin family E member 1(SERPINE1)	1.09625	5.12981	9.21875e-07	-0.742236	5.12981	0.0192602	-1.83849	5.12981	6.49272e-14
NLRP12	NLR family pyrin domain containing 12(NLRP12)	1.09409	1.29276	7.09804e-05	-0.352849	1.29276	0.862368	-1.44694	1.29276	6.22535e-06
USP18	ubiquitin specific peptidase 18(USP18)	1.08623	2.60353	5.53825e-06	0.260853	2.60353	0.937084	-0.825374	2.60353	0.0199139
TUBB2A	tubulin beta 2A class IIa(TUBB2A)	1.08357	5.99678	2.69467e-07	0.272028	5.99678	0.833742	-0.811543	5.99678	0.00476895
APOBEC3A_B	APOBEC3A and APOBEC3B deletion hybrid(APOBEC3A_B)	1.0827	0.422904	0.00114248	0.0422705	0.422904	1	-1.04043	0.422904	0.0253988
FGR	FGR proto-oncogene, Src family tyrosine kinase(FGR)	1.07895	4.63479	8.72381e-07	0.117758	4.63479	1	-0.961191	4.63479	0.00056834
SLC1A2	solute carrier family 1 member 2(SLC1A2)	1.07103	3.07	4.40114e-06	0.24437	3.07	0.93521	-0.826657	3.07	0.00957538
TREM2	triggering receptor expressed on myeloid cells 2(TREM2)	1.07034	2.94261	9.25258e-06	0.0199926	2.94261	1	-1.05035	2.94261	0.000582643
CCL15-CCL14	CCL15-CCL14 readthrough (NMD candidate)(CCL15-CCL14)	1.06939	0.20709	0.00227825	-0.282204	0.20709	1	-1.3516	0.20709	0.00542151
ANLN	anillin actin binding protein(ANLN)	1.06703	2.68369	1.06558e-05	-0.26494	2.68369	0.927749	-1.33197	2.68369	3.20318e-06
JAML	junction adhesion molecule like(JAML)	1.06386	1.99909	2.84839e-05	-0.150516	1.99909	1	-1.21438	1.99909	8.69442e-05
UBD	ubiquitin D(UBD)	1.06308	0.520163	0.00189465	-0.541511	0.520163	0.700601	-1.60459	0.520163	6.76606e-05
LILRA5	leukocyte immunoglobulin like receptor A5(LILRA5)	1.06062	1.54904	0.000104154	0.0658967	1.54904	1	-0.994721	1.54904	0.0077159
SQLE	squalene epoxidase(SQLE)	1.06038	4.61511	1.10374e-06	0.233783	4.61511	0.92371	-0.826596	4.61511	0.00549618
TUBB2B	tubulin beta 2B class IIb(TUBB2B)	1.05394	5.87184	6.79588e-07	0.278317	5.87184	0.820072	-0.77562	5.87184	0.00806229
ITGAX	integrin subunit alpha X(ITGAX)	1.02779	6.14028	1.25589e-05	0.0206926	6.14028	1	-1.0071	6.14028	0.000273677
TFRC	transferrin receptor(TFRC)	1.0276	5.98647	2.20749e-06	0.0647582	5.98647	1	-0.962837	5.98647	0.00044738
KCNE4	potassium voltage-gated channel subfamily E regulatory subunit 4(KCNE4)	1.02527	5.78144	1.9792e-06	-0.128482	5.78144	1	-1.15375	5.78144	6.71684e-06
CCDC3	coiled-coil domain containing 3(CCDC3)	1.0246	6.52167	2.10232e-06	0.202409	6.52167	0.973945	-0.822187	6.52167	0.00702274
MNDA	myeloid cell nuclear differentiation antigen(MNDA)	1.02321	4.13281	3.52398e-06	-0.150302	4.13281	1	-1.17351	4.13281	9.56059e-06
EREG	epiregulin(EREG)	1.0182	-0.115815	0.0143622	-0.116692	-0.115815	1	-1.13489	-0.115815	0.0341602
MARK1	microtubule affinity regulating kinase 1(MARK1)	1.0126	5.72474	2.46172e-06	0.288011	5.72474	0.815472	-0.724588	5.72474	0.0174779
PTK2B	protein tyrosine kinase 2 beta(PTK2B)	1.01216	3.88813	6.58224e-06	0.184495	3.88813	0.987887	-0.827669	3.88813	0.00568838
TRIM16L	tripartite motif containing 16-like(TRIM16L)	1.00913	3.5689	9.0816e-06	-0.202453	3.5689	0.974376	-1.21159	3.5689	8.8274e-06
UBASH3B	ubiquitin associated and SH3 domain containing B(UBASH3B)	1.004	4.42468	5.60242e-06	0.18144	4.42468	0.990432	-0.822558	4.42468	0.0055054
KIF15	kinesin family member 15(KIF15)	1.00166	1.36051	0.000355456	0.151	1.36051	1	-0.850657	1.36051	0.0296656
RARRES3	retinoic acid receptor responder 3(RARRES3)	0.997716	0.47135	0.00367282	-0.0273762	0.47135	1	-1.02509	0.47135	0.0293628
LILRB4	leukocyte immunoglobulin like receptor B4(LILRB4)	0.993221	2.10578	0.00015528	0.119006	2.10578	1	-0.874215	2.10578	0.0150095
MYBPC3	myosin binding protein C, cardiac(MYBPC3)	0.992888	0.977284	0.00151997	-0.149625	0.977284	1	-1.14251	0.977284	0.00185911
ANXA1	annexin A1(ANXA1)	0.991974	9.80744	3.16041e-06	0.12959	9.80744	1	-0.862383	9.80744	0.00206695
HIST1H2AL	histone cluster 1 H2A family member l(HIST1H2AL)	0.98807	1.92522	0.000185775	-0.0142072	1.92522	1	-1.00228	1.92522	0.00311195
CD72	CD72 molecule(CD72)	0.985602	2.37593	8.56741e-05	-0.00600645	2.37593	1	-0.991608	2.37593	0.00269426
RRM2	ribonucleotide reductase regulatory subunit M2(RRM2)	0.982922	2.77013	6.33731e-05	-0.251193	2.77013	0.938985	-1.23411	2.77013	1.80479e-05
CYBB	cytochrome b-245 beta chain(CYBB)	0.982472	6.37561	1.0037e-05	0.178965	6.37561	0.988199	-0.803507	6.37561	0.00773218
IFI6	interferon alpha inducible protein 6(IFI6)	0.982237	5.95802	7.79925e-06	0.188418	5.95802	0.974329	-0.793819	5.95802	0.00806229
IL13RA2	interleukin 13 receptor subunit alpha 2(IL13RA2)	0.98083	1.395	0.000535916	-0.0835425	1.395	1	-1.06437	1.395	0.00300791
TRPV2	transient receptor potential cation channel subfamily V member 2(TRPV2)	0.978556	4.68279	1.40603e-05	0.0710535	4.68279	1	-0.907503	4.68279	0.00157784
PTGS2	prostaglandin-endoperoxide synthase 2(PTGS2)	0.976908	1.98353	0.000183571	-0.393724	1.98353	0.736641	-1.37063	1.98353	9.42012e-06
PALMD	palmdelphin(PALMD)	0.975534	6.77617	5.62447e-06	0.24024	6.77617	0.911124	-0.735294	6.77617	0.020397
RGS18	regulator of G-protein signaling 18(RGS18)	0.974852	2.29368	0.000118839	0.0435493	2.29368	1	-0.931303	2.29368	0.00346111
SRGN	serglycin(SRGN)	0.973917	6.88223	6.51441e-06	0.165186	6.88223	0.996732	-0.808731	6.88223	0.00601696
DHCR24	24-dehydrocholesterol reductase(DHCR24)	0.973585	6.3741	2.18702e-05	-0.80513	6.3741	0.00657873	-1.77871	6.3741	1.10231e-12
TGM5	transglutaminase 5(TGM5)	0.970519	2.63148	0.000249711	0.0790897	2.63148	1	-0.891429	2.63148	0.0148231
MSMO1	methylsterol monooxygenase 1(MSMO1)	0.968871	4.45192	1.62916e-05	-0.265036	4.45192	0.875497	-1.23391	4.45192	2.53675e-06
CD180	CD180 molecule(CD180)	0.941942	2.07454	0.000261926	-0.00502158	2.07454	1	-0.946964	2.07454	0.00377223
HMOX1	heme oxygenase 1(HMOX1)	0.938871	4.28164	3.02124e-05	-0.33215	4.28164	0.704176	-1.27102	4.28164	9.10992e-07
MELK	maternal embryonic leucine zipper kinase(MELK)	0.930907	0.364325	0.00925621	-0.148602	0.364325	1	-1.07951	0.364325	0.0175113
HMGCS1	3-hydroxy-3-methylglutaryl-CoA synthase 1(HMGCS1)	0.929987	5.74983	2.89953e-05	-0.376148	5.74983	0.564534	-1.30614	5.74983	2.6679e-07
GBP1P1	guanylate binding protein 1 pseudogene 1(GBP1P1)	0.927044	4.26992	4.9112e-05	0.0300294	4.26992	1	-0.897015	4.26992	0.00204319
HAL	histidine ammonia-lyase(HAL)	0.92646	2.57848	0.00242827	-0.288229	2.57848	0.934299	-1.21469	2.57848	0.000553039
SPP1	secreted phosphoprotein 1(SPP1)	0.926173	4.68651	0.000139529	0.0314747	4.68651	1	-0.894698	4.68651	0.00192718
NCF2	neutrophil cytosolic factor 2(NCF2)	0.915466	4.51312	6.68812e-05	0.0124963	4.51312	1	-0.90297	4.51312	0.00200769
STAC3	SH3 and cysteine rich domain 3(STAC3)	0.908639	2.33542	0.000346174	0.19172	2.33542	0.994557	-0.716919	2.33542	0.0481065
GBP1	guanylate binding protein 1(GBP1)	0.897629	5.73301	6.14282e-05	0.104606	5.73301	1	-0.793023	5.73301	0.00677426
IFI30	IFI30, lysosomal thiol reductase(IFI30)	0.89095	6.65741	0.000111558	0.0412923	6.65741	1	-0.849658	6.65741	0.00344001
CEP55	centrosomal protein 55(CEP55)	0.887842	0.576475	0.0141985	-0.344197	0.576475	0.946024	-1.23204	0.576475	0.0050001
TRIM16	tripartite motif containing 16(TRIM16)	0.884359	4.00033	0.000139529	-0.244384	4.00033	0.912335	-1.12874	4.00033	3.14655e-05
LYZ	lysozyme(LYZ)	0.883591	7.00565	8.8098e-05	0.158231	7.00565	1	-0.725361	7.00565	0.0194212
EHHADH	enoyl-CoA hydratase and 3-hydroxyacyl CoA dehydrogenase(EHHADH)	0.877363	5.13321	0.00013495	0.155366	5.13321	1	-0.721997	5.13321	0.0211592
HAVCR2	hepatitis A virus cellular receptor 2(HAVCR2)	0.875509	3.22542	0.000337289	0.0699481	3.22542	1	-0.80556	3.22542	0.0123849
LOC105375650	uncharacterized LOC105375650(LOC105375650)	0.874581	0.43254	0.017553	-0.0771204	0.43254	1	-0.951701	0.43254	0.0496189
EEPD1	endonuclease/exonuclease/phosphatase family domain containing 1(EEPD1)	0.874185	6.24587	0.000137691	0.178328	6.24587	0.990052	-0.695857	6.24587	0.027027
CYTIP	cytohesin 1 interacting protein(CYTIP)	0.873881	1.81172	0.0012317	-0.555347	1.81172	0.378184	-1.42923	1.81172	4.59094e-06
HK2	hexokinase 2(HK2)	0.869071	5.27583	0.000154875	-0.308842	5.27583	0.765382	-1.17791	5.27583	7.52696e-06

## Sheet: Table S3
WSD-suppressed genes whose expression was not reversed by CR. DEGs (top seven genes) were filtered using the following parameters: WSD/CHOW, Log2 (fold change) <1.0 and FDR<0.05; CR/CHOW, Log2 (fold change) <1.0 and FDR<0.05.
Ensembl_ID	Entrez Gene Name		WSD/CHOW_FC	WSD/CHOW_CPM	WSD/CHOW_FDR	CR/CHOW_FC	CR/CHOW_CPM	CR/CHOW_FDR	CR/WSD_FC	CR/WSD_CPM	CR/WSD_FDR
IGLL5	immunoglobulin lambda like polypeptide 5(IGLL5)		-3.97605	3.72757	4.37174e-55	-0.929369	3.72757	0.0239244	3.04669	3.72757	4.36896e-22
COL11A1	collagen type XI alpha 1 chain(COL11A1)		-3.23516	5.60105	2.73749e-48	-3.1111	5.60105	2.47862e-25	0.124054	5.60105	0.936624
PTN	pleiotrophin(PTN)		-3.02882	4.78553	4.78139e-45	-1.88858	4.78553	4.40722e-11	1.14024	4.78553	0.000646042
CILP2	cartilage intermediate layer protein 2(CILP2)		-2.64529	3.58284	5.26429e-31	-2.87723	3.58284	2.14224e-20	-0.231937	3.58284	0.847413
GCK	glucokinase(GCK)		-2.59393	4.24233	8.60551e-30	-1.66587	4.24233	4.73594e-10	0.928064	4.24233	0.00601905
POSTN	periostin(POSTN)		-2.58944	8.72578	1.65383e-36	-1.55316	8.72578	2.0779e-08	1.03629	8.72578	0.000757519
ACAN	aggrecan(ACAN)		-2.54886	3.57515	5.38237e-30	-2.73976	3.57515	1.90315e-21	-0.190898	3.57515	0.872169
LRRC15	leucine rich repeat containing 15(LRRC15)		-2.52651	3.5422	3.40175e-30	-1.24974	3.5422	0.000856409	1.27677	3.5422	0.000495877
ITIH1	inter-alpha-trypsin inhibitor heavy chain 1(ITIH1)		-2.28779	3.63125	3.10981e-22	-3.33895	3.63125	3.2458e-25	-1.05115	3.63125	0.0218717
RNASE3	ribonuclease A family member 3(RNASE3)		-2.24267	3.87759	7.4685e-19	-4.31238	3.87759	5.81919e-32	-2.06971	3.87759	7.0527e-06
CRHBP	corticotropin releasing hormone binding protein(CRHBP)		-2.2207	0.176878	1.46351e-10	-0.985378	0.176878	0.0318189	1.23532	0.176878	0.0198038
PRKG2	protein kinase, cGMP-dependent, type II(PRKG2)		-2.21894	0.680924	3.47804e-14	-2.6329	0.680924	1.24949e-13	-0.413957	0.680924	0.762101
ELOVL6	ELOVL fatty acid elongase 6(ELOVL6)		-2.20338	7.42034	1.79546e-26	-2.95888	7.42034	3.42495e-30	-0.755502	7.42034	0.0233284
SPON1	spondin 1(SPON1)		-2.17774	5.79181	2.19149e-25	-2.41893	5.79181	9.63682e-22	-0.241185	5.79181	0.774084
SFRP2	secreted frizzled related protein 2(SFRP2)		-2.04685	6.29553	6.93028e-23	-0.906108	6.29553	0.00592766	1.14075	6.29553	0.000183778
ST6GALNAC5	ST6 N-acetylgalactosaminide alpha-2,6-sialyltransferase 5(ST6GALNAC5)		-2.04004	1.51615	2.79131e-15	-0.952103	1.51615	0.00632286	1.08794	1.51615	0.00388387
TNC	tenascin C(TNC)		-2.01652	7.96364	1.21083e-17	-3.56696	7.96364	9.34209e-38	-1.55044	7.96364	4.04767e-09
CPZ	carboxypeptidase Z(CPZ)		-1.98281	4.98304	1.92449e-22	-0.853811	4.98304	0.0117077	1.12899	4.98304	0.000155982
CDH2	cadherin 2(CDH2)		-1.94231	2.37086	1.49585e-16	-0.877601	2.37086	0.0140116	1.06471	2.37086	0.00193507
FASN	fatty acid synthase(FASN)		-1.88047	12.153	1.94844e-20	-2.13918	12.153	1.85436e-19	-0.258706	12.153	0.719559
ADAM12	ADAM metallopeptidase domain 12(ADAM12)		-1.87499	6.22575	1.1417e-18	-2.35092	6.22575	1.31602e-20	-0.475925	6.22575	0.29605
IFITM10	interferon induced transmembrane protein 10(IFITM10)		-1.8666	4.70489	3.87594e-19	-1.09466	4.70489	3.61327e-05	0.771942	4.70489	0.0156823
LOC101927851	uncharacterized LOC101927851(LOC101927851)		-1.8547	0.627908	1.00535e-08	-1.58342	0.627908	0.000152067	0.271278	0.627908	0.885026
ANGPTL8	angiopoietin like 8(ANGPTL8)		-1.84211	4.56518	5.95617e-17	-3.10937	4.56518	7.3551e-32	-1.26726	4.56518	3.61863e-05
KCNMA1	potassium calcium-activated channel subfamily M alpha 1(KCNMA1)		-1.83786	3.89366	1.93718e-17	-1.11978	3.89366	0.000160149	0.718076	3.89366	0.0386796
CDNF	cerebral dopamine neurotrophic factor(CDNF)		-1.79363	-0.259299	8.92369e-06	-1.38527	-0.259299	0.0158107	0.408365	-0.259299	0.834789
ELK2AP	ELK2A, member of ETS oncogene family, pseudogene(ELK2AP)		-1.74054	2.94053	4.54782e-15	-1.48181	2.94053	1.19051e-07	0.258727	2.94053	0.766262
CHST6	carbohydrate sulfotransferase 6(CHST6)		-1.72643	1.56406	7.09019e-12	-1.6981	1.56406	5.60743e-08	0.0283391	1.56406	0.995936
LIPG	lipase G, endothelial type(LIPG)		-1.6927	1.4249	1.29367e-10	-1.86936	1.4249	2.76071e-09	-0.176659	1.4249	0.907558
DIRAS3	DIRAS family GTPase 3(DIRAS3)		-1.65127	-0.125047	4.9949e-06	-1.48623	-0.125047	0.000900237	0.165036	-0.125047	0.94528
PTCHD1	patched domain containing 1(PTCHD1)		-1.62142	2.68452	1.58895e-12	-0.858609	2.68452	0.0073935	0.762808	2.68452	0.0406292
LOC101928988	uncharacterized LOC101928988(LOC101928988)		-1.5792	-1.12894	0.00786583	-1.70073	-1.12894	0.0428786	-0.121529	-1.12894	0.98105
GALNT5	polypeptide N-acetylgalactosaminyltransferase 5(GALNT5)		-1.5152	3.51981	1.58895e-12	-1.41743	3.51981	4.4932e-07	0.0977724	3.51981	0.946859
ADAMTS14	ADAM metallopeptidase with thrombospondin type 1 motif 14(ADAMTS14)		-1.51462	4.29751	4.97581e-13	-1.55532	4.29751	8.57757e-10	-0.0406963	4.29751	0.981178
P4HA3	prolyl 4-hydroxylase subunit alpha 3(P4HA3)		-1.509	4.10962	4.49927e-12	-1.95899	4.10962	7.76695e-14	-0.449997	4.10962	0.380225
ACLY	ATP citrate lyase(ACLY)		-1.46899	9.25012	9.27326e-13	-2.30998	9.25012	1.65202e-20	-0.840985	9.25012	0.00258755
PFKFB1	6-phosphofructo-2-kinase/fructose-2,6-biphosphatase 1(PFKFB1)		-1.45618	3.12936	4.86628e-08	-1.5113	3.12936	2.11232e-07	-0.0551136	3.12936	0.980048
COL2A1	collagen type II alpha 1 chain(COL2A1)		-1.45194	3.44658	1.85364e-11	-0.826428	3.44658	0.0124934	0.625512	3.44658	0.106801
BMPR1B	bone morphogenetic protein receptor type 1B(BMPR1B)		-1.44815	1.54899	1.92979e-08	-0.959634	1.54899	0.00645298	0.488514	1.54899	0.441985
MAP2K6	mitogen-activated protein kinase kinase 6(MAP2K6)		-1.39897	2.60783	1.82624e-09	-0.834412	2.60783	0.0140392	0.564556	2.60783	0.216651
PYGM	phosphorylase, glycogen, muscle(PYGM)		-1.38904	4.86012	3.57903e-10	-1.55078	4.86012	1.23299e-09	-0.161742	4.86012	0.875519
ACACA	acetyl-CoA carboxylase alpha(ACACA)		-1.38406	8.83436	6.00344e-11	-1.93648	8.83436	1.89644e-15	-0.55242	8.83436	0.133036
COL1A2	collagen type I alpha 2 chain(COL1A2)		-1.38094	13.2569	1.15624e-11	-0.718884	13.2569	0.0342199	0.662052	13.2569	0.052244
LYPD1	LY6/PLAUR domain containing 1(LYPD1)		-1.36214	3.57014	4.35637e-09	-1.40742	3.57014	1.75722e-07	-0.0452793	3.57014	0.981432
NGFR	nerve growth factor receptor(NGFR)		-1.35709	2.60415	8.46334e-09	-0.919458	2.60415	0.00482779	0.437634	2.60415	0.448233
C11orf87	chromosome 11 open reading frame 87(C11orf87)		-1.34416	1.87718	5.65538e-08	-1.028	1.87718	0.00154392	0.316155	1.87718	0.71164
CREB3L1	cAMP responsive element binding protein 3 like 1(CREB3L1)		-1.34012	4.8411	9.88547e-11	-0.861406	4.8411	0.00463658	0.478713	4.8411	0.276062
CISH	cytokine inducible SH2 containing protein(CISH)		-1.33284	4.10063	1.16774e-09	-0.988886	4.10063	0.000403721	0.343958	4.10063	0.550701
GLUL	glutamate-ammonia ligase(GLUL)		-1.32817	9.42922	1.4721e-10	-0.911108	9.42922	0.00107994	0.417064	9.42922	0.333142
GXYLT2	glucoside xylosyltransferase 2(GXYLT2)		-1.3205	4.98425	3.68793e-10	-0.706335	4.98425	0.0456138	0.614168	4.98425	0.0912127
TNN	tenascin N(TNN)		-1.31916	2.68429	2.82568e-08	-1.16741	2.68429	8.31126e-05	0.151744	2.68429	0.900633
PC	pyruvate carboxylase(PC)		-1.3066	8.19656	3.61783e-10	-1.13717	8.19656	7.75545e-06	0.169435	8.19656	0.854601
MIR1245B	microRNA 1245b(MIR1245B)		-1.30162	0.432281	4.51182e-05	-1.02915	0.432281	0.0212072	0.272461	0.432281	0.850325
MIR1245A	microRNA 1245a(MIR1245A)		-1.29044	0.432255	5.45959e-05	-0.988577	0.432255	0.0304949	0.301866	0.432255	0.822586
C1QTNF6	C1q and tumor necrosis factor related protein 6(C1QTNF6)		-1.29017	4.23356	1.46747e-09	-0.8028	4.23356	0.0143562	0.487374	4.23356	0.276062
SDK2	sidekick cell adhesion molecule 2(SDK2)		-1.2898	2.72882	4.11101e-08	-1.10865	2.72882	0.000232586	0.181152	2.72882	0.87386
COL3A1	collagen type III alpha 1 chain(COL3A1)		-1.27565	13.9615	5.09743e-10	-0.788743	13.9615	0.0128025	0.486907	13.9615	0.250058
SLITRK6	SLIT and NTRK like family member 6(SLITRK6)		-1.2741	1.13915	8.2497e-06	-1.00382	1.13915	0.00776398	0.270283	1.13915	0.814602
CDH11	cadherin 11(CDH11)		-1.25171	6.32834	5.10911e-09	-1.36939	6.32834	5.28928e-08	-0.117687	6.32834	0.918855
ADCY10	adenylate cyclase 10, soluble(ADCY10)		-1.25077	4.3451	1.02637e-08	-1.96968	4.3451	3.67995e-14	-0.718911	4.3451	0.0444856
SDC1	syndecan 1(SDC1)		-1.24923	3.20895	4.73192e-08	-0.849215	3.20895	0.0151822	0.400011	3.20895	0.489496
SFRP4	secreted frizzled related protein 4(SFRP4)		-1.23818	8.68683	3.492e-09	-1.01027	8.68683	0.000282197	0.227912	8.68683	0.768015
ST6GAL2	ST6 beta-galactoside alpha-2,6-sialyltransferase 2(ST6GAL2)		-1.21397	0.825289	3.09587e-05	-1.28729	0.825289	0.000506894	-0.0733186	0.825289	0.974754
WT1	Wilms tumor 1(WT1)		-1.2034	0.512485	0.000185275	-1.27641	0.512485	0.00096919	-0.0730058	0.512485	0.976886
PYCR1	pyrroline-5-carboxylate reductase 1(PYCR1)		-1.20203	3.21984	7.72168e-08	-1.06226	3.21984	0.000664186	0.139768	3.21984	0.909394
GPR39	G protein-coupled receptor 39(GPR39)		-1.19977	3.28202	7.76077e-07	-1.20804	3.28202	1.89548e-05	-0.00826988	3.28202	1
KCNA5	potassium voltage-gated channel subfamily A member 5(KCNA5)		-1.19039	0.945582	0.000144389	-1.18752	0.945582	0.0047816	0.00286847	0.945582	1
LY9	lymphocyte antigen 9(LY9)		-1.17608	1.64566	1.14305e-05	-1.66618	1.64566	1.74747e-07	-0.4901	1.64566	0.503689
ST8SIA2	ST8 alpha-N-acetyl-neuraminide alpha-2,8-sialyltransferase 2(ST8SIA2)		-1.14153	3.54414	7.14032e-07	-0.950309	3.54414	0.00112677	0.191219	3.54414	0.850445
UMODL1	uromodulin like 1(UMODL1)		-1.13252	0.937405	0.000154875	-0.973817	0.937405	0.0207626	0.158703	0.937405	0.92635
THBS4	thrombospondin 4(THBS4)		-1.1314	5.04253	4.79733e-06	-1.03802	5.04253	0.00271034	0.0933837	5.04253	0.948023
LINCMD1	long intergenic non-protein coding RNA, muscle differentiation 1(LINCMD1)		-1.12625	0.536281	0.000990988	-2.31918	0.536281	3.54055e-07	-1.19294	0.536281	0.0884936
DCLK3	doublecortin like kinase 3(DCLK3)		-1.11046	1.14811	0.000213162	-1.35593	1.14811	0.000248202	-0.245473	1.14811	0.865722
ADAMTS16	ADAM metallopeptidase with thrombospondin type 1 motif 16(ADAMTS16)		-1.10081	5.08834	4.13e-07	-1.38292	5.08834	3.21039e-08	-0.282106	5.08834	0.672796
CNTN3	contactin 3(CNTN3)		-1.1008	1.26821	7.37308e-05	-0.948288	1.26821	0.017051	0.152515	1.26821	0.922434
RUNX2	runt related transcription factor 2(RUNX2)		-1.0997	3.51681	1.57501e-06	-0.771082	3.51681	0.0212072	0.32862	3.51681	0.621095
COL12A1	collagen type XII alpha 1 chain(COL12A1)		-1.07568	8.94294	7.73347e-07	-1.10178	8.94294	3.02952e-05	-0.0261047	8.94294	0.991998
COL24A1	collagen type XXIV alpha 1 chain(COL24A1)		-1.06773	1.56498	6.67281e-05	-0.959118	1.56498	0.00655787	0.108607	1.56498	0.947996
LOC100128317	uncharacterized LOC100128317(LOC100128317)		-1.06145	0.0992856	0.00356732	-1.2923	0.0992856	0.00427931	-0.230856	0.0992856	0.898312
KIF26B	kinesin family member 26B(KIF26B)		-1.05048	2.87211	1.00466e-05	-0.773562	2.87211	0.0233078	0.276918	2.87211	0.728501
C6orf15	chromosome 6 open reading frame 15(C6orf15)		-1.04736	1.06999	0.000535916	-1.09888	1.06999	0.00483908	-0.0515216	1.06999	0.984066
LOC101927296	uncharacterized LOC101927296(LOC101927296)		-1.04489	0.915862	0.000535916	-1.10922	0.915862	0.00332265	-0.0643325	0.915862	0.977382
LOC101448202	uncharacterized LOC101448202(LOC101448202)		-1.0357	4.16829	3.16041e-06	-0.759506	4.16829	0.0204339	0.276199	4.16829	0.696568
CRACR2A	calcium release activated channel regulator 2A(CRACR2A)		-1.03459	2.76542	1.94253e-05	-1.11715	2.76542	0.000160149	-0.0825605	2.76542	0.957367
LRRN1	leucine rich repeat neuronal 1(LRRN1)		-1.00234	3.89458	1.99807e-05	-0.879239	3.89458	0.00323336	0.123097	3.89458	0.915036
CEMIP	cell migration inducing hyaluronan binding protein(CEMIP)		-0.997529	2.74891	4.51394e-05	-1.11468	2.74891	0.000122106	-0.117155	2.74891	0.932717
TFF3	trefoil factor 3(TFF3)		-0.995475	0.013148	0.0476469	-1.61757	0.013148	0.00178811	-0.622094	0.013148	0.626816
MXRA5	matrix remodeling associated 5(MXRA5)		-0.979621	9.00729	6.93362e-06	-1.12808	9.00729	1.70188e-05	-0.148461	9.00729	0.882078
ADRB3	adrenoceptor beta 3(ADRB3)		-0.978599	2.9601	8.56741e-05	-0.84593	2.9601	0.0120395	0.132669	2.9601	0.913913
COL5A1	collagen type V alpha 1 chain(COL5A1)		-0.96287	10.0519	8.54478e-06	-0.670836	10.0519	0.0467228	0.292034	10.0519	0.643954
FBXO32	F-box protein 32(FBXO32)		-0.952592	6.81778	1.52742e-05	-0.83311	6.81778	0.00337943	0.119481	6.81778	0.91391
ME1	malic enzyme 1(ME1)		-0.946986	8.07087	5.36354e-05	-2.07301	8.07087	6.3458e-17	-1.12602	8.07087	1.20453e-05
COL10A1	collagen type X alpha 1 chain(COL10A1)		-0.94666	3.1631	0.000105428	-0.887768	3.1631	0.00681928	0.0588923	3.1631	0.971237
FNDC1	fibronectin type III domain containing 1(FNDC1)		-0.940634	7.07116	1.98938e-05	-0.724747	7.07116	0.0230278	0.215887	7.07116	0.775868
LOC105370333	uncharacterized LOC105370333(LOC105370333)		-0.940342	0.227902	0.0204146	-1.1535	0.227902	0.0145509	-0.213162	0.227902	0.906458
BGN	biglycan(BGN)		-0.932929	6.32623	5.28944e-05	-0.998061	6.32623	0.000664186	-0.0651312	6.32623	0.965466
MIR503HG	MIR503 host gene(MIR503HG)		-0.93048	0.733306	0.00443233	-1.26766	0.733306	0.000968974	-0.337179	0.733306	0.765806
HAPLN3	hyaluronan and proteoglycan link protein 3(HAPLN3)		-0.92348	2.40215	0.000263364	-1.34301	2.40215	4.75116e-06	-0.419532	2.40215	0.497822
PRND	prion protein 2 (dublet)(PRND)		-0.918688	1.12745	0.0078833	-1.22793	1.12745	0.00551038	-0.309239	1.12745	0.827902
PRSS35	protease, serine 35(PRSS35)		-0.899384	2.6329	0.000407011	-0.999907	2.6329	0.00104236	-0.100524	2.6329	0.945502
C1QTNF9B-AS1	C1QTNF9B antisense RNA 1(C1QTNF9B-AS1)		-0.88694	3.39696	0.000355456	-1.34055	3.39696	1.54316e-06	-0.453612	3.39696	0.407349
SNHG24	small nucleolar RNA host gene 24(SNHG24)		-0.885284	3.76044	0.000169715	-0.754903	3.76044	0.02254	0.130381	3.76044	0.909359
FCN3	ficolin 3(FCN3)		-0.878105	3.55458	0.000308448	-1.27236	3.55458	1.38651e-06	-0.394257	3.55458	0.484802
SNORD114-7	small nucleolar RNA, C/D box 114-7(SNORD114-7)		-0.872742	0.693188	0.010952	-1.15917	0.693188	0.00483363	-0.286424	0.693188	0.825802
KIAA1211	KIAA1211(KIAA1211)		-0.872374	3.63334	0.000311412	-0.861699	3.63334	0.00655564	0.0106747	3.63334	1
PCSK2	proprotein convertase subtilisin/kexin type 2(PCSK2)		-0.872248	0.85554	0.00817933	-1.26018	0.85554	0.000472394	-0.387931	0.85554	0.691146
ADCK3	adenylate cyclase 3		-0.871992	6.24802	0.000151181	-0.985944	6.24802	0.000279319	-0.113952	6.24802	0.921802
KLLN	killin, p53-regulated DNA replication inhibitor(KLLN)		-0.869068	1.3536	0.00581608	-1.2383	1.3536	0.000469491	-0.369233	1.3536	0.695665
SLC25A1	solute carrier family 25 member 1(SLC25A1)		-0.861287	6.75483	0.000181823	-1.49799	6.75483	1.38346e-09	-0.636705	6.75483	0.0569788
DLK1	delta like non-canonical Notch ligand 1(DLK1)		-0.861251	4.29619	0.000260452	-1.27449	4.29619	1.86299e-06	-0.413243	4.29619	0.435531
BRINP1	BMP/retinoic acid inducible neural specific 1(BRINP1)		-0.831795	2.15426	0.00310671	-1.30242	2.15426	1.82594e-05	-0.47063	2.15426	0.447064
LRRC17	leucine rich repeat containing 17(LRRC17)		-0.828891	4.72391	0.000453535	-0.93884	4.72391	0.000936409	-0.109949	4.72391	0.924237
TCF15	transcription factor 15 (basic helix-loop-helix)(TCF15)		-0.814436	1.41788	0.0124306	-0.882916	1.41788	0.0430484	-0.0684798	1.41788	0.974977
CLEC3A	C-type lectin domain family 3 member A(CLEC3A)		-0.812178	1.51559	0.0282878	-1.46964	1.51559	0.000144631	-0.657458	1.51559	0.314084
C1QTNF9B	C1q and tumor necrosis factor related protein 9B(C1QTNF9B)		-0.807919	3.73398	0.00121108	-1.60014	3.73398	1.91238e-09	-0.792226	3.73398	0.0212686
LOC101927151	uncharacterized LOC101927151(LOC101927151)		-0.807416	5.70768	0.000701386	-1.47795	5.70768	4.17727e-09	-0.670537	5.70768	0.04319
EGFLAM	EGF like, fibronectin type III and laminin G domains(EGFLAM)		-0.807053	3.6955	0.00102339	-1.32309	3.6955	7.05757e-07	-0.516035	3.6955	0.245851
ADAMTS17	ADAM metallopeptidase with thrombospondin type 1 motif 17(ADAMTS17)		-0.806514	2.30591	0.00290609	-0.826647	2.30591	0.0221749	-0.0201336	2.30591	0.999371
MLXIPL	MLX interacting protein like(MLXIPL)		-0.805875	5.21654	0.000672001	-0.707705	5.21654	0.0284162	0.09817	5.21654	0.938552
EVA1A	eva-1 homolog A, regulator of programmed cell death(EVA1A)		-0.796989	1.12239	0.0139287	-1.12283	1.12239	0.00271702	-0.32584	1.12239	0.754298
COL18A1	collagen type XVIII alpha 1 chain(COL18A1)		-0.792533	6.50005	0.000780848	-0.969044	6.50005	0.00030028	-0.176511	6.50005	0.850194
KLHL31	kelch like family member 31(KLHL31)		-0.790208	6.91352	0.00100025	-1.38166	6.91352	4.44694e-08	-0.591452	6.91352	0.096879
MMP23A	matrix metallopeptidase 23A (pseudogene)(MMP23A)		-0.788309	4.18398	0.00118905	-0.763148	4.18398	0.0185529	0.0251613	4.18398	0.992545
CACNG2	calcium voltage-gated channel auxiliary subunit gamma 2(CACNG2)		-0.78486	1.43655	0.0193574	-0.860386	1.43655	0.0347218	-0.0755261	1.43655	0.968691
GPD1	glycerol-3-phosphate dehydrogenase 1(GPD1)		-0.784789	9.14508	0.000926674	-0.837507	9.14508	0.00314183	-0.0527181	9.14508	0.971621
C1QTNF9	C1q and tumor necrosis factor related protein 9(C1QTNF9)		-0.783171	4.36789	0.00145412	-1.51628	4.36789	5.19965e-09	-0.733108	4.36789	0.0304654
HECW1	HECT, C2 and WW domain containing E3 ubiquitin protein ligase 1(HECW1)		-0.780752	2.04208	0.0128879	-1.23023	2.04208	0.000209806	-0.449481	2.04208	0.528714
MMP23B	matrix metallopeptidase 23B(MMP23B)		-0.769917	4.42747	0.00155987	-0.755734	4.42747	0.0196201	0.0141822	4.42747	0.999783
GYG2P1	glycogenin 2 pseudogene 1(GYG2P1)		-0.766528	2.42245	0.00855376	-0.773269	2.42245	0.040978	-0.00674116	2.42245	1
MICAL2	microtubule associated monooxygenase, calponin and LIM domain containing 2(MICAL2)		-0.766474	4.5129	0.00170535	-0.88219	4.5129	0.00386348	-0.115716	4.5129	0.924089
GSTT2	glutathione S-transferase theta 2 (gene/pseudogene)(GSTT2)		-0.747953	6.01848	0.00241648	-1.18941	6.01848	4.94958e-06	-0.441461	6.01848	0.321053
GSTT2B	glutathione S-transferase theta 2B (gene/pseudogene)(GSTT2B)		-0.74717	6.01225	0.00246922	-1.18537	6.01225	5.50565e-06	-0.438201	6.01225	0.329663
ACSM5	acyl-CoA synthetase medium-chain family member 5(ACSM5)		-0.738339	4.37548	0.00362816	-0.740552	4.37548	0.023844	-0.00221301	4.37548	1
AACS	acetoacetyl-CoA synthetase(AACS)		-0.733517	6.67693	0.00277229	-1.60431	6.67693	8.54688e-11	-0.870792	6.67693	0.00215448
COL5A2	collagen type V alpha 2 chain(COL5A2)		-0.713491	10.2011	0.00293573	-0.731187	10.2011	0.0201547	-0.0176953	10.2011	0.998732
UNC5D	unc-5 netrin receptor D(UNC5D)		-0.703197	2.07189	0.0195064	-1.0663	2.07189	0.00164817	-0.363107	2.07189	0.648869
ASPN	asporin(ASPN)		-0.697512	7.49799	0.00537859	-1.53359	7.49799	4.24707e-10	-0.836083	7.49799	0.00303563
ADAM19	ADAM metallopeptidase domain 19(ADAM19)		-0.69439	4.34611	0.00626264	-1.0222	4.34611	0.000252712	-0.327807	4.34611	0.587192
LSAMP	limbic system-associated membrane protein(LSAMP)		-0.688471	3.89818	0.0124289	-1.28032	3.89818	2.71841e-06	-0.591847	3.89818	0.150372
SLC1A3	solute carrier family 1 member 3(SLC1A3)		-0.685348	5.5551	0.00753675	-1.13368	5.5551	2.20405e-05	-0.448328	5.5551	0.325997
C10orf10	chromosome 10 open reading frame 10(C10orf10)		-0.678527	6.45619	0.00752626	-0.855161	6.45619	0.00427931	-0.176634	6.45619	0.84176
AACSP1	acetoacetyl-CoA synthetase pseudogene 1(AACSP1)		-0.672341	4.6019	0.0114634	-1.49832	4.6019	8.4748e-09	-0.825978	4.6019	0.00804897
EYA1	EYA transcriptional coactivator and phosphatase 1(EYA1)		-0.667024	3.43558	0.0162946	-0.723229	3.43558	0.036855	-0.0562046	3.43558	0.972993
IGF1	insulin like growth factor 1(IGF1)		-0.642496	7.61271	0.0105412	-1.0244	7.61271	9.62714e-05	-0.381901	7.61271	0.433745
THRSP	thyroid hormone responsive(THRSP)		-0.638511	10.9252	0.0206722	-2.04012	10.9252	3.61474e-17	-1.40161	10.9252	2.60718e-08
COL8A1	collagen type VIII alpha 1 chain(COL8A1)		-0.628366	5.66091	0.0294688	-0.709611	5.66091	0.036855	-0.0812452	5.66091	0.953069
TKT	transketolase(TKT)		-0.625345	8.41699	0.0165609	-1.06737	8.41699	3.92885e-05	-0.442026	8.41699	0.301929
CALB2	calbindin 2(CALB2)		-0.624358	4.14583	0.0282262	-1.2572	4.14583	3.95932e-06	-0.632841	4.14583	0.0952396
C1QTNF3	C1q and tumor necrosis factor related protein 3(C1QTNF3)		-0.621541	5.18504	0.0212775	-1.60064	5.18504	2.79968e-10	-0.979097	5.18504	0.00029508
RASGRF2	Ras protein specific guanine nucleotide releasing factor 2(RASGRF2)		-0.613534	6.32985	0.0212699	-0.855943	6.32985	0.00306555	-0.242409	6.32985	0.737713
SMIM3	small integral membrane protein 3(SMIM3)		-0.598802	5.57885	0.0254033	-0.745152	5.57885	0.0164874	-0.14635	5.57885	0.885983
MIF	macrophage migration inhibitory factor (glycosylation-inhibiting factor)(MIF)		-0.585589	7.55339	0.0295946	-0.877486	7.55339	0.00161656	-0.291897	7.55339	0.634653
APLNR	apelin receptor(APLNR)		-0.577224	4.07916	0.0432846	-1.28382	4.07916	1.19162e-06	-0.706595	4.07916	0.0352825
MIF-AS1	MIF antisense RNA 1(MIF-AS1)		-0.568175	6.35947	0.0400424	-0.860309	6.35947	0.00240197	-0.292134	6.35947	0.638964
